# Supplementary material for: Recognition of maize seed varieties based on hyperspectral imaging technology and integrated learning algorithms
Source: PeerJ Comput Sci. 2023 May 10;9:e1354. doi: 10.7717/peerj-cs.1354 (PMC10280578; doi:10.7717/peerj-cs.1354)
Supplement: Supplemental Information 1 — Each row represents the hyperspectral data information of a seed. There are 60 rows representing the data information of 60 seeds. Each column represents the band information of each seed, and there are 176 columns in the table, representing 176 bands. [file peerj-cs-09-1354-s001.xls]

## Sheet: Sheet1
0.0351002	0.0274915	0.0248993	0.0232794	0.0225372	0.0215979	0.0212567	0.0215611	0.0219513	0.0222451	0.022779	0.0226621	0.0228166	0.0230051	0.0230595	0.0234258	0.0233177	0.0234067	0.0236662	0.0239435	0.0238821	0.0243072	0.0247305	0.0249818	0.0254536	0.0257181	0.0263095	0.0266077	0.0270512	0.0276786	0.0280895	0.0288419	0.029726	0.0308777	0.0322544	0.0347884	0.0385923	0.0428604	0.0482911	0.0543346	0.0599202	0.0657026	0.0722318	0.0792021	0.0844594	0.0893071	0.0946429	0.097733	0.100252	0.104072
0.0381161	0.0314601	0.0266321	0.0250844	0.023791	0.0237358	0.0238568	0.0237264	0.0248122	0.0253619	0.0257856	0.0266129	0.0269563	0.0272632	0.0275232	0.0281855	0.0281494	0.0283849	0.0286638	0.0291494	0.0296134	0.0298954	0.0305148	0.0312683	0.0317031	0.0323379	0.0327903	0.0334425	0.0337701	0.0345831	0.0352243	0.0362683	0.037654	0.0391939	0.0414028	0.0448627	0.0500821	0.0557794	0.0628349	0.0705803	0.07762	0.0845846	0.0925439	0.101079	0.107089	0.112614	0.118654	0.122633	0.124633	0.128444
0.0494038	0.0423514	0.041708	0.040658	0.0399058	0.0414353	0.0426378	0.0439815	0.0458099	0.0471579	0.0484215	0.0499306	0.0507785	0.0520151	0.0521651	0.0532016	0.0537915	0.0540694	0.0547638	0.0555063	0.0561472	0.0572593	0.0580306	0.058981	0.059729	0.0607194	0.0618017	0.0625552	0.0637757	0.0649713	0.0659359	0.0672559	0.0691592	0.0707703	0.0730355	0.077556	0.0844278	0.0916293	0.101014	0.111528	0.12125	0.130368	0.141311	0.153604	0.163221	0.170911	0.179837	0.185919	0.188836	0.193623
0.0478905	0.0410563	0.0397679	0.0376834	0.0381253	0.0384336	0.039815	0.0404887	0.0424366	0.0434874	0.0450126	0.0458789	0.0466015	0.0475234	0.0483391	0.0492978	0.0494493	0.050281	0.0509176	0.0514824	0.0524954	0.0535393	0.054447	0.0556344	0.056577	0.0574289	0.0585385	0.0593531	0.0605536	0.0620861	0.0633577	0.0650161	0.0673158	0.0700142	0.0735806	0.0792551	0.0885279	0.0986263	0.110277	0.12394	0.137134	0.149334	0.162955	0.178421	0.190602	0.200507	0.211599	0.21888	0.22247	0.228647
0.0566709	0.0513291	0.0491893	0.0488291	0.0501043	0.0519574	0.0536562	0.0549754	0.0572256	0.0590593	0.0610462	0.0624673	0.0631463	0.0641499	0.0645832	0.065513	0.0661169	0.0668536	0.067291	0.0679048	0.0691544	0.0701047	0.0714275	0.0723421	0.0736958	0.0747584	0.075833	0.0772192	0.0784962	0.0800194	0.0818394	0.0836568	0.0860762	0.0891897	0.0932345	0.0997941	0.109814	0.120217	0.132771	0.147037	0.160222	0.172711	0.187167	0.2034	0.216549	0.227295	0.239387	0.246863	0.250323	0.257817
0.0526806	0.0480778	0.0464064	0.0449116	0.0461555	0.0479972	0.0493951	0.0503609	0.0527203	0.0541228	0.055442	0.0564588	0.0572219	0.0577706	0.0588585	0.0595949	0.0604239	0.0606892	0.0610272	0.0616824	0.0625517	0.063321	0.0642853	0.0652998	0.0661086	0.0668646	0.0679263	0.0688372	0.0697564	0.070885	0.0720116	0.0734171	0.0753425	0.0775267	0.0805978	0.0859159	0.0942632	0.102961	0.114154	0.127211	0.1396	0.151472	0.165214	0.180139	0.192424	0.203069	0.213861	0.220671	0.223994	0.23117
0.0365646	0.0289506	0.0260696	0.0239452	0.0231462	0.0225666	0.0223131	0.0228878	0.0228493	0.0231833	0.0238881	0.0238654	0.0241822	0.0245434	0.0248459	0.0247985	0.0252914	0.0252257	0.0254624	0.025783	0.0259424	0.0265009	0.0268728	0.0275345	0.0281703	0.0285028	0.0294276	0.0299663	0.0303609	0.0312298	0.0320511	0.0331255	0.034587	0.0364913	0.0387992	0.0425054	0.0477408	0.053594	0.0606481	0.0681422	0.0750541	0.0818134	0.0895091	0.0973857	0.103098	0.108653	0.114462	0.118012	0.120325	0.124521
0.0427471	0.0358881	0.0314648	0.0296828	0.0293653	0.0294413	0.0296534	0.0303608	0.0312181	0.0321765	0.0322401	0.0333158	0.0336514	0.0342558	0.0347959	0.0353974	0.0356	0.0359296	0.0363322	0.0367746	0.0374246	0.0377938	0.0382908	0.0389965	0.0397936	0.0403707	0.0412004	0.0417922	0.0424248	0.0432607	0.0438571	0.0447848	0.0458767	0.0470875	0.0485041	0.0514759	0.0561982	0.0614287	0.0681198	0.0759233	0.0833322	0.0910334	0.100005	0.109525	0.116866	0.123753	0.131232	0.136285	0.139214	0.143946
0.0471901	0.0395136	0.0372277	0.0365719	0.0354692	0.0362981	0.0375915	0.0383289	0.039677	0.0407917	0.0415042	0.0428777	0.0435689	0.0444949	0.0449983	0.0458749	0.0459566	0.0467257	0.047393	0.0479405	0.0488792	0.049992	0.050646	0.0520734	0.0530138	0.0538394	0.0547706	0.0556446	0.0565584	0.0578545	0.0590255	0.0607741	0.0631897	0.0658335	0.0693605	0.0755249	0.0844097	0.0941997	0.106541	0.120379	0.133488	0.146072	0.159994	0.175748	0.188026	0.198071	0.209691	0.217591	0.221788	0.228369
0.0514275	0.0449855	0.0433331	0.0424919	0.0428105	0.0434871	0.0453222	0.0467706	0.0489643	0.0498202	0.0520873	0.0532183	0.0548154	0.0554286	0.05671	0.0581974	0.0587816	0.0602425	0.0609801	0.0621942	0.0636395	0.0648598	0.0662565	0.0680168	0.0696787	0.0710697	0.0725609	0.073925	0.0757805	0.078	0.0800696	0.0830683	0.0865608	0.0903378	0.0952176	0.102489	0.113779	0.125314	0.138582	0.153571	0.167753	0.180372	0.194584	0.211021	0.223823	0.233998	0.246184	0.253822	0.257507	0.264046
0.0553505	0.0483211	0.0459588	0.046455	0.048589	0.0495018	0.0516809	0.0533827	0.0554065	0.0566316	0.0587999	0.0605331	0.0616214	0.0627098	0.0630344	0.0638857	0.0648153	0.065699	0.0665178	0.0670489	0.0682088	0.0690579	0.0703014	0.071185	0.0726063	0.0731002	0.0740863	0.07508	0.0760903	0.0771743	0.0786118	0.080155	0.0819866	0.084276	0.0874763	0.0930128	0.101987	0.111593	0.123667	0.137796	0.15134	0.164479	0.179603	0.196536	0.210134	0.221834	0.234454	0.242801	0.247134	0.255171
0.056582	0.0512491	0.0500895	0.0493058	0.0510705	0.0529557	0.054517	0.0553343	0.0578198	0.0593803	0.0612431	0.0624202	0.06364	0.0649064	0.0656966	0.0669505	0.0679247	0.0687498	0.0698005	0.0706835	0.0715667	0.0729191	0.0746519	0.0759828	0.0773938	0.0786809	0.0801133	0.081484	0.0830029	0.0850238	0.087087	0.0900584	0.093768	0.0977353	0.103185	0.111724	0.12405	0.136781	0.151981	0.169211	0.184535	0.199273	0.215449	0.23307	0.247262	0.259143	0.271701	0.279306	0.282541	0.290467
0.0369439	0.0299246	0.027273	0.025003	0.0243857	0.0241379	0.024251	0.0247385	0.025219	0.0254889	0.0264221	0.0265148	0.0270986	0.0274418	0.0279646	0.0285519	0.0289881	0.0291804	0.0296148	0.0299475	0.0303858	0.0310051	0.0314152	0.0320204	0.0328048	0.0333519	0.0341725	0.0348281	0.0353215	0.0363	0.0370291	0.0380614	0.0393369	0.0408848	0.0430051	0.0465095	0.051707	0.0574131	0.0644638	0.0723147	0.0792554	0.085971	0.093929	0.102225	0.108272	0.114131	0.120398	0.12425	0.127002	0.131377
0.0452974	0.0393642	0.0362141	0.0344028	0.0334616	0.0338859	0.0344604	0.0344375	0.0357257	0.0365724	0.0368981	0.0375664	0.0381421	0.0385517	0.0389923	0.039462	0.0399796	0.0404123	0.0407104	0.0414332	0.0418733	0.0424252	0.0432976	0.0440435	0.0449217	0.045468	0.0462837	0.0471041	0.0476551	0.048493	0.0495008	0.0504867	0.0522071	0.0540629	0.0564268	0.0610522	0.0678306	0.0754485	0.0850983	0.0959438	0.105962	0.116295	0.127646	0.140166	0.149678	0.158141	0.167886	0.174178	0.177871	0.183965
0.0467436	0.0405547	0.0394944	0.0388541	0.0385907	0.0396011	0.0409692	0.0429321	0.0442297	0.0457731	0.0470617	0.0483429	0.0495172	0.0507701	0.0514124	0.0524491	0.053395	0.0541106	0.0550757	0.0562031	0.0571748	0.0581109	0.0592286	0.0605943	0.0615676	0.062794	0.0637252	0.0649382	0.0658197	0.0672243	0.0683135	0.0700831	0.0725202	0.0747649	0.0778802	0.0836613	0.0918683	0.100421	0.111565	0.123789	0.135227	0.146178	0.15883	0.173144	0.184292	0.193542	0.204481	0.212071	0.216019	0.222518
0.055794	0.0492958	0.0490313	0.0489847	0.0493249	0.0510525	0.052834	0.0540734	0.0568685	0.0584542	0.0607417	0.0619156	0.0638104	0.0650156	0.0664303	0.0682725	0.0688118	0.0705009	0.0719742	0.0734907	0.0753846	0.0768399	0.07844	0.0802403	0.0819044	0.0835093	0.0851603	0.0867745	0.0883764	0.0909651	0.0930671	0.0955966	0.0992952	0.102864	0.107059	0.11412	0.125021	0.136423	0.14953	0.16459	0.179079	0.191862	0.206959	0.224308	0.238017	0.249276	0.262122	0.270805	0.275126	0.282903
0.0499306	0.0448715	0.0423185	0.0413683	0.0431003	0.0440672	0.0457131	0.0476302	0.0500077	0.0518198	0.0532699	0.0553288	0.0564308	0.0578098	0.0590843	0.0600212	0.0610903	0.0623307	0.0634986	0.0648628	0.0658116	0.0669163	0.0685281	0.0697323	0.0712776	0.0723562	0.0734041	0.0747744	0.0760096	0.0775523	0.0792695	0.0816128	0.0843678	0.0876001	0.0918928	0.0986269	0.109207	0.120133	0.133352	0.148522	0.162683	0.176097	0.191293	0.208033	0.221311	0.232616	0.244786	0.252559	0.256319	0.264272
0.0495565	0.0448445	0.0426903	0.0416468	0.0423166	0.0436358	0.0443611	0.0452618	0.0473705	0.0485734	0.0501102	0.0505249	0.051694	0.0528571	0.0536905	0.053962	0.0552605	0.0560429	0.0570814	0.0579332	0.0586791	0.0598138	0.0611366	0.0620973	0.0631263	0.0641681	0.0651711	0.0660222	0.067242	0.0686482	0.0699809	0.0715459	0.0737695	0.0761815	0.0795864	0.0856105	0.0948482	0.105252	0.118462	0.13411	0.149401	0.164251	0.180981	0.19921	0.214199	0.22736	0.241214	0.249976	0.255103	0.26412
0.0387755	0.0320715	0.0299486	0.0279397	0.0266901	0.0268533	0.0265746	0.0267106	0.0273276	0.027517	0.0284099	0.0283793	0.0288194	0.0295109	0.0297345	0.0299045	0.0303868	0.0305522	0.0310892	0.0313114	0.0315342	0.0320389	0.0324495	0.0328825	0.0336522	0.034049	0.034777	0.0351144	0.0356186	0.0364208	0.0368958	0.037822	0.0389882	0.040387	0.0422574	0.0455265	0.0505642	0.0563898	0.0634725	0.0717641	0.0794645	0.087161	0.096052	0.105692	0.112795	0.120106	0.127452	0.132406	0.135984	0.141422
0.0507915	0.0440278	0.0425505	0.0414391	0.041921	0.0431517	0.0444441	0.045884	0.0480436	0.0497245	0.0511255	0.0524591	0.0538781	0.0551257	0.0563887	0.0574937	0.0584741	0.0596255	0.0604584	0.0616339	0.0626162	0.0638278	0.0649296	0.066288	0.0676856	0.0686661	0.0699659	0.0711702	0.0722284	0.0738629	0.0749212	0.0766777	0.0787861	0.0809543	0.0832807	0.0882962	0.0956257	0.103304	0.112972	0.123607	0.132809	0.14198	0.152725	0.164354	0.173021	0.180614	0.189694	0.195195	0.198193	0.203652
0.0553127	0.0478426	0.0482283	0.0492279	0.0493896	0.0511619	0.0529647	0.0557142	0.0573276	0.0591476	0.0607975	0.06265	0.0644314	0.0658016	0.0668631	0.0685606	0.0697041	0.070934	0.0726369	0.0740749	0.0757562	0.0770206	0.078527	0.0800807	0.0815818	0.0830861	0.0845567	0.0857448	0.0871443	0.0888169	0.0902151	0.0921353	0.0950949	0.0974823	0.100717	0.106789	0.115975	0.125179	0.136908	0.149706	0.161346	0.17207	0.184593	0.199024	0.210034	0.218271	0.229081	0.236141	0.239489	0.245678
0.0559655	0.0493496	0.049372	0.0493417	0.0508537	0.0522187	0.0545216	0.0561642	0.0586278	0.0601578	0.0621376	0.0629731	0.0650513	0.0663116	0.0676668	0.0690342	0.0698107	0.0712386	0.0729083	0.0745578	0.0759914	0.0775039	0.0787107	0.0802384	0.0817686	0.0831506	0.0845877	0.085738	0.087093	0.0887494	0.0902692	0.0920598	0.0944716	0.0966418	0.0994949	0.104534	0.113277	0.122341	0.133184	0.145786	0.157951	0.169167	0.181989	0.19707	0.208793	0.218405	0.229738	0.23729	0.241068	0.247609
0.0598783	0.0541071	0.0529372	0.0541233	0.0572057	0.0589126	0.0620905	0.0638708	0.0663209	0.0684012	0.0702664	0.0722702	0.0744195	0.0761787	0.0778178	0.0794337	0.0806484	0.0822411	0.0840196	0.0855749	0.0876346	0.089384	0.0916398	0.09293	0.0953641	0.0969617	0.0986666	0.100532	0.102217	0.104018	0.106537	0.109145	0.112717	0.116591	0.121702	0.129465	0.141758	0.154286	0.169169	0.186114	0.201835	0.216144	0.232867	0.251733	0.266178	0.277882	0.291416	0.29972	0.303798	0.312204
0.0554605	0.0509997	0.0491754	0.0504093	0.0524635	0.0545699	0.0576161	0.0590696	0.0615893	0.0629935	0.0646337	0.0660841	0.0679025	0.0693494	0.0710756	0.0718569	0.0733806	0.0744036	0.0758132	0.077453	0.0785913	0.0800373	0.0818123	0.0833124	0.0845224	0.0860282	0.087389	0.0882507	0.0897953	0.0917542	0.0935626	0.0957422	0.0989452	0.102474	0.106935	0.114445	0.1259	0.137664	0.152311	0.169588	0.185406	0.200244	0.217135	0.235552	0.250182	0.262644	0.275795	0.283783	0.28802	0.296822
0.0388241	0.0314643	0.028689	0.0270601	0.0264261	0.0257754	0.0258734	0.0266724	0.0269005	0.0267568	0.0271925	0.0276608	0.0278737	0.0282752	0.028512	0.0287332	0.0289316	0.0292546	0.0295656	0.0298703	0.0300011	0.0307323	0.0309744	0.0313361	0.0320122	0.0324333	0.0329869	0.0332357	0.033651	0.0344109	0.034962	0.0357794	0.0371255	0.03859	0.0406585	0.0441979	0.049661	0.0555609	0.0629669	0.0714335	0.079362	0.0874104	0.0966534	0.106813	0.114603	0.122204	0.130328	0.135588	0.139697	0.145482
0.0470488	0.0411845	0.0379627	0.0358125	0.036318	0.0371032	0.0378189	0.0382453	0.0395648	0.0406924	0.0415873	0.0427353	0.0436775	0.0445728	0.0451204	0.0462493	0.0471097	0.0477571	0.0483357	0.0492933	0.0499802	0.0510439	0.0522797	0.0535521	0.0547376	0.0558715	0.0567684	0.0579327	0.0590357	0.060227	0.0616149	0.063585	0.0661733	0.0690424	0.0726311	0.0787335	0.0874128	0.0964784	0.107663	0.119371	0.12998	0.140528	0.152608	0.16553	0.175136	0.183944	0.194115	0.200603	0.204309	0.210624
0.0534594	0.0466009	0.0465739	0.0455846	0.0450862	0.0466281	0.0484236	0.0492234	0.050257	0.0514726	0.0529166	0.0540093	0.054827	0.0559365	0.0568136	0.0580551	0.0588692	0.0596491	0.0608053	0.0617977	0.0626477	0.0637697	0.0647058	0.066037	0.0670484	0.0681052	0.0689772	0.0699199	0.0708757	0.0720165	0.0729392	0.0744269	0.0766573	0.0785326	0.0810676	0.0864018	0.0945394	0.103766	0.115471	0.128744	0.141766	0.154122	0.168223	0.184276	0.196801	0.207193	0.219213	0.227868	0.232816	0.239811
0.0565465	0.0508667	0.0495103	0.0506419	0.0519488	0.0533155	0.0557246	0.057514	0.0599286	0.061182	0.0628105	0.0642027	0.0656732	0.0668816	0.0683113	0.0700339	0.0707533	0.0720948	0.0735893	0.0747435	0.0760404	0.0774609	0.0787331	0.0803713	0.0815187	0.0827355	0.0840041	0.0848626	0.0860179	0.087497	0.0887257	0.0904069	0.0929323	0.0955332	0.0988453	0.105051	0.115407	0.126382	0.140149	0.156103	0.171693	0.186697	0.203848	0.222864	0.238559	0.250866	0.264993	0.274886	0.279672	0.287982
0.0508781	0.0450299	0.0435959	0.0435289	0.0455772	0.0470025	0.0492229	0.0516507	0.0535732	0.0555551	0.0572011	0.0589063	0.0603678	0.0621826	0.0630641	0.0643437	0.0657069	0.0669946	0.0682995	0.0698026	0.071107	0.0723837	0.0740443	0.0753152	0.0765949	0.078221	0.0794702	0.0807522	0.0819693	0.0832361	0.0846302	0.0860938	0.0878317	0.0897576	0.0922778	0.0970047	0.105064	0.113441	0.124474	0.13746	0.150107	0.162478	0.176768	0.192943	0.206077	0.217323	0.229857	0.238252	0.242822	0.251305
0.0509761	0.0471292	0.0458639	0.0461986	0.0478221	0.0505621	0.0525661	0.0544536	0.0567971	0.0588488	0.0600573	0.0616477	0.0633821	0.0649804	0.066414	0.0674869	0.0690006	0.0703339	0.07194	0.0735139	0.0746961	0.0763569	0.0779989	0.079523	0.0812285	0.0827648	0.0843251	0.0857976	0.0872227	0.0891698	0.0910409	0.0934575	0.0967229	0.0997627	0.103932	0.110652	0.120987	0.131455	0.144379	0.15902	0.172507	0.185139	0.199825	0.215962	0.228488	0.239544	0.251194	0.258704	0.262623	0.27068
0.0468624	0.0393792	0.038669	0.0362569	0.0371499	0.0374466	0.0377058	0.0387962	0.0400567	0.0410504	0.0421694	0.042353	0.0436569	0.0443198	0.0450238	0.0454052	0.0460133	0.0465663	0.0468749	0.0473139	0.047966	0.0488389	0.0494617	0.0498505	0.0508679	0.0515212	0.0523321	0.0530896	0.0538609	0.0547964	0.0556017	0.0567013	0.0581279	0.0599629	0.0621765	0.0662333	0.072592	0.0792347	0.0876385	0.09702	0.105394	0.11377	0.123851	0.134716	0.142589	0.150287	0.158254	0.163188	0.166655	0.172529
0.0460928	0.03969	0.0374258	0.0357883	0.0355323	0.0355529	0.0361031	0.0368259	0.0370415	0.0380169	0.0384949	0.0392176	0.039928	0.0404559	0.0409619	0.0414981	0.0420511	0.0424235	0.0429242	0.0434076	0.0441144	0.0448132	0.0457891	0.0466084	0.047623	0.0484979	0.0493024	0.0499873	0.0505382	0.0514476	0.0525485	0.0541588	0.0562817	0.0588653	0.062007	0.067632	0.0757149	0.0846166	0.0954481	0.106949	0.117948	0.128575	0.140641	0.153648	0.163562	0.172566	0.182978	0.189288	0.192994	0.199394
0.0444536	0.0374987	0.0363506	0.0351775	0.0345446	0.0359916	0.0365956	0.0378449	0.0387939	0.0397715	0.0407488	0.0417105	0.0425915	0.0435552	0.0443071	0.0449381	0.0456902	0.0463199	0.0471779	0.0475614	0.0484947	0.049476	0.0502086	0.0514261	0.0520394	0.0530806	0.05362	0.0543753	0.0551205	0.0561465	0.0568551	0.0579604	0.0599805	0.0618202	0.0641978	0.0689011	0.0756287	0.0829522	0.0923232	0.102655	0.112626	0.122229	0.133394	0.145675	0.155517	0.163727	0.173342	0.180175	0.183507	0.189151
0.0491656	0.042418	0.0402449	0.0399547	0.0409298	0.0412602	0.042573	0.0436568	0.0448702	0.0457095	0.046898	0.0478602	0.0488996	0.0494111	0.0504138	0.0516749	0.0516329	0.0530928	0.0540366	0.0548563	0.0559747	0.057165	0.0588418	0.0602615	0.061529	0.0624923	0.0637904	0.0645329	0.0656701	0.0675608	0.0691209	0.0716973	0.0751384	0.0792463	0.0844567	0.0924375	0.10416	0.116326	0.130378	0.145832	0.160344	0.1739	0.188772	0.205734	0.219118	0.229909	0.242252	0.250581	0.25438	0.261945
0.0455159	0.0385132	0.0351449	0.0341493	0.0354052	0.0359934	0.0372846	0.0379372	0.039796	0.0401577	0.0414773	0.0423235	0.0429945	0.0435657	0.044512	0.0453503	0.0458037	0.0465858	0.0474972	0.0481289	0.0490122	0.0498406	0.0509339	0.0512944	0.052299	0.0530465	0.053777	0.0544881	0.0550567	0.055903	0.056774	0.057621	0.0588844	0.060335	0.0626884	0.0667685	0.0735996	0.0814231	0.0914577	0.103672	0.115865	0.128181	0.142153	0.157841	0.170617	0.181824	0.193871	0.201985	0.206937	0.215039
0.0539763	0.0493085	0.0487908	0.0485275	0.0504613	0.0526134	0.0550512	0.0565201	0.0593542	0.0610757	0.0628659	0.063883	0.0654073	0.0668115	0.068425	0.0692138	0.0706079	0.071703	0.0730207	0.0741507	0.0751955	0.0764862	0.0782383	0.0794018	0.0808026	0.0821698	0.0837066	0.0847363	0.0862218	0.0880412	0.0897456	0.091969	0.094745	0.0978889	0.101781	0.108664	0.119086	0.129775	0.143068	0.158774	0.172966	0.186638	0.202122	0.218647	0.232325	0.243387	0.255797	0.262915	0.26715	0.275429
0.0471041	0.0381915	0.0361252	0.0337427	0.0325806	0.03297	0.0334324	0.0337833	0.0336984	0.0344379	0.034913	0.0352567	0.0357242	0.0363835	0.0367688	0.0369497	0.0371864	0.0375316	0.0378926	0.0379172	0.0382883	0.038946	0.0393866	0.0397053	0.0404655	0.0409446	0.0417226	0.0422672	0.0429142	0.0439145	0.0445623	0.0455833	0.0469769	0.0486642	0.0508568	0.0547194	0.0605696	0.0672569	0.0757526	0.0851856	0.0940723	0.103117	0.113356	0.124661	0.132848	0.140683	0.148929	0.153817	0.157312	0.162747
0.0479984	0.0413382	0.0382689	0.035998	0.0363236	0.03669	0.0375909	0.0383198	0.0396773	0.0405148	0.0415398	0.0423982	0.0436821	0.0441336	0.0452742	0.0460799	0.046373	0.0470744	0.047822	0.0484213	0.0492814	0.0502405	0.0511941	0.0522322	0.053245	0.0541141	0.0552701	0.0560407	0.057066	0.0582669	0.0595629	0.0611836	0.0632076	0.0655886	0.0684018	0.0734791	0.0808	0.088469	0.0982971	0.108536	0.118093	0.127524	0.138714	0.150861	0.160171	0.168663	0.178449	0.184771	0.188359	0.194552
0.0464835	0.0380542	0.0374721	0.0352264	0.034855	0.0356522	0.0364563	0.0380062	0.0391676	0.0402067	0.0414228	0.0429018	0.0439548	0.0452311	0.0461893	0.0470302	0.0478546	0.0487054	0.0497419	0.0507009	0.0518183	0.0530638	0.0541034	0.0555294	0.0567959	0.0581259	0.0592712	0.0604618	0.0618371	0.063529	0.0651253	0.0672072	0.0702218	0.0732689	0.0769278	0.0832608	0.0921188	0.101346	0.112668	0.125276	0.136735	0.147662	0.160242	0.174234	0.185528	0.194692	0.205351	0.212626	0.216556	0.222838
0.0559917	0.0507281	0.0505057	0.0512957	0.0527933	0.0540636	0.0569966	0.0593819	0.06141	0.0628724	0.0643457	0.0659963	0.0674161	0.0683356	0.0699315	0.0713107	0.0717922	0.0731743	0.0741078	0.0753317	0.0762497	0.077539	0.0787681	0.0798831	0.0809476	0.0819484	0.0833271	0.0840237	0.0850836	0.0862168	0.0875759	0.0889006	0.0910123	0.0931038	0.0960096	0.101013	0.10965	0.118511	0.129616	0.142461	0.154757	0.166578	0.180191	0.195818	0.208052	0.218473	0.230116	0.23788	0.241276	0.248218
0.0592586	0.0537025	0.0538725	0.054474	0.0567089	0.058364	0.0616413	0.0630274	0.0653131	0.0663513	0.0682187	0.069913	0.0710995	0.0723035	0.073331	0.074843	0.0758816	0.0768008	0.0778397	0.0791427	0.0804966	0.0820609	0.083477	0.084801	0.0866969	0.0882272	0.0895219	0.0908849	0.0923294	0.0940087	0.095906	0.0983908	0.101771	0.10578	0.110752	0.118841	0.131365	0.143738	0.158643	0.175748	0.191248	0.205583	0.221786	0.240196	0.254201	0.265918	0.278641	0.286467	0.289584	0.297424
0.0520003	0.0453748	0.0451745	0.0444382	0.0459129	0.0484027	0.0504809	0.0516883	0.0536026	0.0555562	0.0569786	0.0577252	0.0593885	0.0609087	0.0620027	0.0631304	0.0642538	0.0651802	0.0663322	0.0675432	0.0681975	0.0696111	0.0705288	0.0720134	0.0733625	0.0744454	0.0757671	0.0768616	0.0780005	0.0793125	0.0804747	0.0819583	0.0837371	0.0856006	0.0878664	0.0922339	0.0997576	0.107593	0.117683	0.130271	0.142123	0.153663	0.167402	0.182396	0.194822	0.205451	0.216709	0.224319	0.228461	0.236412
0.0428944	0.0348809	0.0313614	0.0294608	0.0286321	0.0288388	0.0299306	0.0298242	0.0310114	0.0314722	0.0318419	0.0320326	0.0329074	0.033512	0.034155	0.0346362	0.034866	0.0351795	0.0356703	0.0360265	0.0363498	0.0370594	0.0376764	0.0379323	0.039063	0.0396092	0.0403162	0.0410936	0.0417469	0.042789	0.0437439	0.0446697	0.0461035	0.0478053	0.0496491	0.0531886	0.0584106	0.0641739	0.0712332	0.0791829	0.0864572	0.0936058	0.10207	0.111462	0.118328	0.124692	0.131806	0.136086	0.139182	0.144065
0.04725	0.0398677	0.0365629	0.0345798	0.0336681	0.0338356	0.0336383	0.0339697	0.0346292	0.0356322	0.0355273	0.0363077	0.0364796	0.0369745	0.0372398	0.0380487	0.0381491	0.0383506	0.0385392	0.0389311	0.0392351	0.0395968	0.0400299	0.0404375	0.0409849	0.0414404	0.0421307	0.042588	0.0431289	0.0439555	0.0445304	0.0454148	0.0466643	0.0480914	0.0497946	0.0535018	0.0592551	0.0656608	0.0741305	0.0837725	0.0931517	0.102887	0.114237	0.126388	0.1358	0.144652	0.154284	0.160543	0.164418	0.170005
0.0552764	0.0474768	0.0473231	0.0465645	0.0460398	0.0478923	0.0495038	0.0510414	0.0526508	0.0542945	0.0560736	0.057104	0.0587304	0.0600105	0.0609203	0.0617872	0.0625813	0.0633585	0.0642893	0.065207	0.0660065	0.0670924	0.0681287	0.0692745	0.0704727	0.0715399	0.072583	0.0735923	0.0747125	0.0760517	0.0771814	0.0789335	0.0813303	0.0831561	0.0860228	0.0913312	0.099206	0.107467	0.118053	0.12999	0.141041	0.151427	0.163739	0.177924	0.188927	0.197838	0.208472	0.215902	0.219553	0.225413
0.0503671	0.0435359	0.041671	0.0408258	0.0417978	0.0416076	0.0429431	0.0438472	0.0447006	0.046107	0.0473169	0.0479998	0.0488856	0.049642	0.0502654	0.0512646	0.0513939	0.0522958	0.0527222	0.0534579	0.0541213	0.054936	0.0557933	0.0566374	0.057515	0.0582178	0.0591132	0.0597378	0.0603912	0.061559	0.0627655	0.0642208	0.0659698	0.0683157	0.0713044	0.0761304	0.0842963	0.0930157	0.103442	0.115449	0.127078	0.138003	0.150053	0.163959	0.174709	0.183945	0.194231	0.201112	0.204346	0.210473
0.0548806	0.0478373	0.0452401	0.0451531	0.0465133	0.0470817	0.0485976	0.0498328	0.0516415	0.0526946	0.0540014	0.0556327	0.0565923	0.0577972	0.0581899	0.0593061	0.0597302	0.0607366	0.061575	0.0620587	0.0630402	0.0640029	0.0652664	0.0660074	0.0675715	0.068627	0.0697744	0.070794	0.0719016	0.0731827	0.0746333	0.0765951	0.0792426	0.0819345	0.0857606	0.0919685	0.101922	0.112195	0.124948	0.1394	0.152934	0.165436	0.179853	0.195539	0.207639	0.217897	0.229215	0.236311	0.239651	0.246974
0.0549572	0.0515038	0.0498853	0.0502483	0.0525278	0.054334	0.0571937	0.0585586	0.0612626	0.0631703	0.0653931	0.0668078	0.0681979	0.0699236	0.0714076	0.0721208	0.0735468	0.0742871	0.075504	0.0762683	0.0769534	0.0780392	0.0794771	0.0808001	0.0822083	0.0836601	0.0848443	0.0856196	0.0869925	0.088517	0.0896313	0.0910908	0.0931833	0.0950515	0.097673	0.10297	0.111481	0.120265	0.131428	0.14486	0.15682	0.168015	0.180993	0.195032	0.206335	0.215624	0.225564	0.231701	0.234211	0.240718
0.0393524	0.031789	0.0287402	0.0263289	0.0245844	0.0251807	0.0247927	0.0250638	0.0256594	0.0254249	0.0261467	0.0266461	0.0267492	0.0271251	0.0273382	0.0274116	0.0277352	0.0278161	0.0281424	0.0280146	0.0281001	0.0287673	0.0291576	0.0295158	0.0301322	0.0305258	0.031315	0.0317986	0.032096	0.0330181	0.0336059	0.0345302	0.0358709	0.0375816	0.0396223	0.0429882	0.0480035	0.0537198	0.0606812	0.0683352	0.0754831	0.0825165	0.0906033	0.0994529	0.10573	0.111866	0.118205	0.122191	0.124662	0.128963
0.0518398	0.0439784	0.0396947	0.0375217	0.0366488	0.0369491	0.0371833	0.0377323	0.0382645	0.0393378	0.0394697	0.0399466	0.0404033	0.0407683	0.0408852	0.0414307	0.0415059	0.0415922	0.041533	0.0418267	0.0419394	0.0423534	0.0426409	0.043025	0.0433799	0.0437518	0.0445109	0.0451478	0.0457161	0.046337	0.0470196	0.0479485	0.0491876	0.0504705	0.0523046	0.0558892	0.0613492	0.0676725	0.0759903	0.0852277	0.0943237	0.103413	0.114097	0.125516	0.134354	0.142196	0.151107	0.15686	0.159845	0.165159
0.0508401	0.0438255	0.0418265	0.0401837	0.0392237	0.0410983	0.0413409	0.0432796	0.04393	0.0453895	0.0464461	0.0471978	0.0481712	0.0491177	0.0497121	0.0504553	0.0511059	0.0514059	0.0520796	0.0524265	0.052892	0.0538148	0.0542054	0.0551399	0.0559312	0.0566727	0.057554	0.0582716	0.0592289	0.0601814	0.0611339	0.0622035	0.0638485	0.0649002	0.0665359	0.0702281	0.0759958	0.0820873	0.090464	0.0998133	0.109077	0.11785	0.128331	0.140202	0.149946	0.157761	0.166879	0.17321	0.176406	0.181736
0.0484625	0.0402007	0.0373716	0.0360328	0.0361387	0.0354735	0.0368517	0.0388932	0.0394276	0.0405165	0.0420104	0.043267	0.0440056	0.0450181	0.0454663	0.0467862	0.0467516	0.0472985	0.0480787	0.0486663	0.0490642	0.0501465	0.0509294	0.0519982	0.0526796	0.0535268	0.0544445	0.055097	0.05589	0.0570094	0.0582882	0.059701	0.0617948	0.0639691	0.0671528	0.0718317	0.079488	0.087315	0.0965347	0.106797	0.116632	0.125813	0.136231	0.148034	0.157757	0.165518	0.174694	0.180833	0.184112	0.189858
0.048148	0.0409645	0.0376244	0.0373831	0.0382848	0.0388395	0.0400463	0.0416784	0.0432191	0.0448938	0.0458958	0.0477725	0.0486942	0.0499144	0.0505328	0.0514086	0.0518826	0.0528901	0.0534926	0.0541656	0.0548142	0.0559623	0.0570985	0.0579282	0.0593314	0.0603508	0.0614269	0.0625346	0.0635956	0.0648119	0.0661301	0.0677821	0.0696984	0.0719992	0.0748628	0.0799769	0.0878251	0.0959645	0.105809	0.117029	0.127514	0.137198	0.148334	0.160781	0.170581	0.179009	0.188253	0.193986	0.196559	0.202132
0.0506868	0.0451316	0.0430331	0.0418169	0.0430042	0.0433597	0.0451856	0.0460549	0.047502	0.0483704	0.0499254	0.0505677	0.0517674	0.0526353	0.0532722	0.0538682	0.0543903	0.0547863	0.0551489	0.0555154	0.055886	0.0564229	0.0574762	0.0581832	0.0590194	0.0597935	0.0607554	0.0613898	0.0622549	0.0631795	0.0640647	0.0651316	0.0665228	0.0681129	0.0704022	0.0747592	0.0816644	0.0890763	0.0985405	0.109726	0.120241	0.130274	0.141932	0.154762	0.165141	0.174255	0.183857	0.189544	0.192731	0.199006
0.0441941	0.0357463	0.0334041	0.0300146	0.0289951	0.029456	0.0290552	0.0293256	0.0308132	0.0311101	0.031191	0.031699	0.0323702	0.032381	0.0326522	0.0326308	0.0331519	0.0326116	0.0327058	0.0327709	0.0328942	0.0334778	0.0337144	0.0339757	0.0346508	0.0349535	0.035655	0.0362544	0.0367794	0.0375462	0.0381918	0.0391441	0.0402893	0.0417712	0.0436226	0.0468252	0.0517487	0.0570309	0.0636108	0.0706768	0.0771906	0.0834883	0.0906411	0.0983636	0.103844	0.109145	0.114858	0.117858	0.119729	0.123672
0.0428361	0.0361753	0.0319693	0.0302218	0.0292601	0.029879	0.0295841	0.0295579	0.0304157	0.0312676	0.0316192	0.0322743	0.0325719	0.0331668	0.0333006	0.0338047	0.03367	0.0337562	0.0337857	0.0340803	0.0341209	0.0344093	0.0348779	0.0354123	0.0359149	0.0365618	0.0371262	0.0376863	0.0381952	0.0389217	0.0396246	0.0407856	0.0420531	0.0436242	0.0457252	0.0495019	0.0549769	0.0609252	0.0685186	0.0769575	0.0850316	0.0930813	0.101672	0.111395	0.118534	0.125203	0.132584	0.137094	0.13984	0.143917
0.0423966	0.0347449	0.0326666	0.0304257	0.0292891	0.0298535	0.0305058	0.0312144	0.0318088	0.0327883	0.0334633	0.0340762	0.035013	0.0352594	0.0359895	0.0362624	0.0365352	0.0370865	0.0372988	0.0376946	0.0379536	0.0386131	0.0390224	0.039738	0.0401974	0.0408323	0.0416088	0.042222	0.0430675	0.0438448	0.0445878	0.0454297	0.0468024	0.0479042	0.0492854	0.0526408	0.0574229	0.0627257	0.0696993	0.0779766	0.0858867	0.0938743	0.103158	0.113695	0.122006	0.129309	0.137193	0.142975	0.146255	0.15081
0.041813	0.0336729	0.0302979	0.0280183	0.0278416	0.0264455	0.0271719	0.0278541	0.0280259	0.0279795	0.0284897	0.0291291	0.029129	0.0294959	0.0295487	0.0301412	0.0300664	0.0305277	0.0306417	0.0307291	0.0310699	0.0314468	0.0318121	0.0323418	0.0324888	0.0329407	0.0333922	0.0336663	0.0342745	0.0348116	0.0354641	0.0363127	0.0375368	0.0387809	0.0406729	0.0441039	0.0495426	0.0557838	0.0633678	0.0724556	0.0813978	0.0904617	0.100314	0.111529	0.120704	0.12873	0.137399	0.143525	0.146816	0.152185
0.0538373	0.0487896	0.0463647	0.0454864	0.0460303	0.0469871	0.0486563	0.0507306	0.0522845	0.0534356	0.0550122	0.0563738	0.0575434	0.0581428	0.0589156	0.0597384	0.0600439	0.0606092	0.061315	0.0611684	0.0617659	0.0627134	0.063772	0.06485	0.0660148	0.0670112	0.0680658	0.0691247	0.0702233	0.0712476	0.0726685	0.0739648	0.0757313	0.0776065	0.0802305	0.0848157	0.0923211	0.0997325	0.108751	0.119184	0.128561	0.137161	0.147548	0.158984	0.167638	0.174683	0.182854	0.187393	0.188781	0.193691
0.0509474	0.0450706	0.042606	0.0417456	0.0424897	0.0440971	0.046364	0.0476923	0.0503775	0.0524884	0.0543005	0.0555328	0.0570882	0.0586968	0.0599804	0.0606151	0.061779	0.0621413	0.0627213	0.0634076	0.0637186	0.0649007	0.0663172	0.067555	0.068927	0.0702068	0.0718221	0.0729127	0.0740827	0.0756447	0.0769378	0.078589	0.0806986	0.0829292	0.0859257	0.0909176	0.0988248	0.106509	0.115983	0.126756	0.136062	0.145019	0.155016	0.166127	0.174714	0.181508	0.188962	0.19305	0.194502	0.198996
[truncated: 126 more columns]
