# Supplementary material for: Recognition of maize seed varieties based on hyperspectral imaging technology and integrated learning algorithms
Source: PeerJ Comput Sci. 2023 May 10;9:e1354. doi: 10.7717/peerj-cs.1354 (PMC10280578; doi:10.7717/peerj-cs.1354)
Supplement: Supplemental Information 2 — Each row represents the hyperspectral data information of a seed. There are 60 rows representing the data information of 60 seeds. Each column represents the band information of each seed, and there are 176 columns in the table, representing 176 bands. [file peerj-cs-09-1354-s002.xls]

## Sheet: Sheet1
0.0357026	0.0287075	0.0251951	0.0220282	0.02173	0.0212916	0.0215307	0.0217738	0.0220845	0.0225445	0.0223642	0.022564	0.0231625	0.0229637	0.0230014	0.0234742	0.0230554	0.0232589	0.0231939	0.0233844	0.0237083	0.0238771	0.0244554	0.024472	0.0249389	0.0252287	0.0255426	0.0262116	0.0263148	0.0268295	0.0273151	0.0278485	0.0287968	0.0297704	0.030926	0.0330878	0.0363198	0.0400289	0.0446052	0.0498656	0.0550667	0.0604301	0.0666994	0.0733998	0.0786468	0.0834495	0.0885135	0.0914482	0.0937103	0.097421
0.0383314	0.0335174	0.0287993	0.0281745	0.027606	0.026828	0.0270855	0.0275949	0.0281234	0.0289654	0.0292293	0.0298669	0.0303992	0.0305992	0.0310064	0.031575	0.0316204	0.0316451	0.0321735	0.0323452	0.0329442	0.0333728	0.0338789	0.0345527	0.0351801	0.0355846	0.0364599	0.0371271	0.0374898	0.0384341	0.0390008	0.0400005	0.0412473	0.0426	0.0442621	0.0472341	0.0515504	0.0562585	0.0621876	0.0687026	0.0754043	0.0820515	0.089985	0.0987697	0.105299	0.111314	0.118002	0.121972	0.124542	0.128658
0.0400977	0.0338755	0.031734	0.0302101	0.0288202	0.0293672	0.0297549	0.0303876	0.0311212	0.031944	0.0328128	0.033167	0.0338557	0.0347559	0.0348146	0.0354195	0.035407	0.0355566	0.0361357	0.0365676	0.0370229	0.037604	0.0379975	0.0389429	0.0395191	0.0400115	0.0405862	0.0412442	0.0418169	0.0426908	0.0433887	0.0444904	0.0459397	0.0475196	0.0496659	0.0535129	0.0590981	0.0654368	0.0735541	0.0831656	0.0928239	0.102708	0.114341	0.127458	0.137977	0.146888	0.156648	0.163578	0.167207	0.172518
0.0564367	0.0493881	0.0488313	0.0475141	0.0485039	0.0496447	0.050823	0.0519895	0.0536364	0.0546297	0.056881	0.057765	0.0586063	0.0589439	0.0596778	0.0605539	0.0605903	0.0613452	0.0618504	0.0624835	0.0634068	0.0642006	0.0650207	0.0661633	0.066997	0.067873	0.0687633	0.0696045	0.0705116	0.0719984	0.0731607	0.074661	0.0765689	0.0787292	0.0812162	0.0858312	0.09349	0.101632	0.111388	0.123723	0.136584	0.150203	0.166607	0.185751	0.202534	0.216366	0.231297	0.241361	0.246874	0.254794
0.0568523	0.0525045	0.0508258	0.050706	0.052634	0.054466	0.0570003	0.0580649	0.0610918	0.0630158	0.0647698	0.0662864	0.06787	0.0685997	0.069642	0.0704838	0.0712956	0.0719192	0.0726642	0.0733289	0.0744435	0.0757637	0.0770501	0.0780015	0.0794524	0.0804853	0.081688	0.0829205	0.0841467	0.0854464	0.0869251	0.0887058	0.0908513	0.0932047	0.0962353	0.101496	0.109887	0.118216	0.128824	0.141402	0.153852	0.166517	0.18189	0.199695	0.214028	0.226385	0.23971	0.248018	0.252116	0.260294
0.0522823	0.0474461	0.0458856	0.0458147	0.0476862	0.0484035	0.0509907	0.0512729	0.0535602	0.0549119	0.056298	0.0567369	0.0579919	0.0588027	0.0596497	0.059958	0.06071	0.060812	0.0613854	0.0621	0.0626839	0.0635473	0.0647522	0.0656287	0.0662634	0.0669324	0.0678454	0.0685947	0.0696712	0.0707361	0.0718831	0.0733804	0.0752146	0.0771119	0.0799555	0.0846589	0.0920469	0.099763	0.109946	0.122236	0.134472	0.147246	0.162523	0.179302	0.19388	0.205949	0.218624	0.226599	0.231237	0.239144
0.03281	0.0257663	0.0230032	0.0194309	0.0185349	0.0182188	0.0181913	0.0180607	0.0180955	0.0184433	0.0181763	0.0178226	0.0182147	0.0180937	0.0176	0.0181082	0.0180438	0.018028	0.018079	0.0180638	0.0181271	0.0184709	0.018911	0.0188361	0.0193687	0.0196858	0.0198516	0.020191	0.020436	0.0208745	0.0212928	0.0215602	0.0222678	0.0231559	0.0241795	0.0259595	0.0287381	0.0319838	0.0362171	0.0411942	0.0463617	0.0516435	0.0581656	0.0651935	0.0709546	0.0760685	0.0814793	0.0850933	0.0876963	0.0913805
0.0421036	0.0360657	0.0317083	0.0312232	0.0307399	0.0301536	0.0300708	0.0308241	0.031749	0.031809	0.0325302	0.0332473	0.0336228	0.0339957	0.0342794	0.0348083	0.0349294	0.0353824	0.0355524	0.0359192	0.0365174	0.03707	0.0375053	0.0380581	0.0387741	0.0393157	0.0399351	0.0405967	0.0410138	0.0417755	0.0423771	0.0432597	0.0444671	0.0457513	0.0472639	0.0501653	0.0546451	0.059514	0.0660896	0.0735449	0.081247	0.0894018	0.0990298	0.109743	0.118258	0.126059	0.134711	0.14058	0.143996	0.149484
0.0501762	0.0431992	0.0422208	0.0418827	0.041483	0.042958	0.0439943	0.0455396	0.0465082	0.0474358	0.0488226	0.0497879	0.0505401	0.0517981	0.0520237	0.0530326	0.0533444	0.0540796	0.0547277	0.0554228	0.0562284	0.0571887	0.0578517	0.0589846	0.0598653	0.0606807	0.0616572	0.0623069	0.0631394	0.0641479	0.0649329	0.0662984	0.0683215	0.0701753	0.0724582	0.0771248	0.0840339	0.091493	0.101315	0.112759	0.124002	0.135306	0.148777	0.164294	0.176543	0.186995	0.19866	0.207157	0.211482	0.218359
0.059824	0.053039	0.0515464	0.0512516	0.0516181	0.0526754	0.0541704	0.0553787	0.0577268	0.0590841	0.06109	0.0621244	0.0634606	0.0643399	0.0653249	0.0663833	0.0667834	0.0681655	0.0687872	0.0699084	0.0708151	0.0720657	0.0732899	0.0745418	0.0756584	0.0767083	0.0777887	0.0785731	0.0797569	0.0812779	0.0826696	0.0845366	0.0869852	0.0896114	0.0929303	0.0985197	0.107954	0.117961	0.130067	0.144842	0.159628	0.174607	0.191995	0.211953	0.228563	0.242619	0.258091	0.269056	0.275004	0.284233
0.0568686	0.051209	0.0494025	0.0495254	0.0501784	0.0515045	0.0535902	0.0551158	0.0565569	0.0576056	0.0594588	0.0607477	0.062117	0.0628963	0.06369	0.0643717	0.0651835	0.0662045	0.0668566	0.0675855	0.0686203	0.0697279	0.0709885	0.0719544	0.0733274	0.0741939	0.0751402	0.076218	0.0771483	0.0783537	0.0799231	0.0817313	0.0839876	0.0865566	0.0899617	0.0955393	0.10465	0.114334	0.126487	0.141262	0.155776	0.170504	0.18785	0.206953	0.223226	0.23699	0.251819	0.261024	0.265772	0.274533
0.0654663	0.0629737	0.0603061	0.0621118	0.0636495	0.0656918	0.0670669	0.0689037	0.0710319	0.0730169	0.0748373	0.0756908	0.0766645	0.0775172	0.0782987	0.0792636	0.0803696	0.0805836	0.0814574	0.0822024	0.0826547	0.0838649	0.0848772	0.0859224	0.0868006	0.0875123	0.0885658	0.089312	0.0900601	0.0914672	0.0928828	0.0944472	0.0965176	0.0987684	0.101563	0.106881	0.116155	0.125628	0.137697	0.152892	0.167622	0.182785	0.200568	0.221154	0.238695	0.253197	0.26871	0.278807	0.28456	0.294266
0.0370543	0.0303047	0.0274738	0.0240138	0.0231846	0.0232908	0.023517	0.023412	0.0233787	0.0239714	0.0238503	0.0241935	0.024554	0.0243798	0.0245998	0.0251835	0.0248168	0.0250384	0.02501	0.0250421	0.025303	0.0257556	0.0262427	0.0262893	0.026982	0.0274275	0.0276958	0.0281973	0.0285901	0.0289657	0.0296689	0.0304131	0.0316562	0.0330991	0.0349794	0.0379979	0.0425983	0.0478138	0.054414	0.0618914	0.0692289	0.0768721	0.085613	0.0948832	0.102258	0.10887	0.115702	0.119991	0.123178	0.128186
0.0449113	0.0394568	0.0359525	0.0346059	0.0340307	0.0343781	0.0342751	0.0343456	0.0353877	0.0356705	0.0364405	0.0368195	0.0376771	0.0376634	0.0383294	0.038895	0.039355	0.0395294	0.0398074	0.0402208	0.0406178	0.0412488	0.0417821	0.0424337	0.0430569	0.0434594	0.0441871	0.0447584	0.045165	0.0457977	0.0464314	0.0472386	0.0485348	0.04991	0.0513191	0.054634	0.0596731	0.065149	0.0727035	0.0814629	0.0906032	0.100478	0.112488	0.125873	0.136733	0.147192	0.158334	0.165703	0.170582	0.177379
0.0498844	0.0442911	0.0437129	0.0425864	0.0422968	0.0442104	0.0450149	0.0463075	0.0473773	0.0489546	0.0498878	0.0508909	0.0525435	0.0539245	0.0544048	0.0556066	0.0564974	0.057177	0.0583588	0.0592884	0.0602441	0.0614614	0.0628575	0.0642183	0.065375	0.0665583	0.0676781	0.0688268	0.0700037	0.0714092	0.072967	0.0751165	0.0780942	0.0807883	0.0840626	0.090116	0.0983963	0.10733	0.118505	0.131088	0.143392	0.155555	0.169978	0.186089	0.199236	0.210027	0.222516	0.231509	0.236007	0.243413
0.0542578	0.0490809	0.0484442	0.0490685	0.050683	0.0514533	0.0541785	0.0557671	0.0578142	0.0592903	0.0612306	0.0624397	0.0642426	0.0653198	0.0666089	0.0680277	0.0688988	0.0705436	0.0716845	0.073084	0.0743029	0.0760079	0.0772298	0.0786155	0.0795969	0.0807742	0.0821553	0.0829874	0.0841723	0.0856542	0.0869293	0.0884268	0.0903164	0.092325	0.0944796	0.0987876	0.106552	0.114479	0.124179	0.136346	0.148072	0.160248	0.174888	0.191839	0.206087	0.218208	0.232022	0.24136	0.246548	0.254836
0.0585589	0.0535123	0.0531013	0.0523934	0.0553463	0.0568899	0.0584741	0.0605601	0.0627751	0.0641185	0.0657003	0.0676737	0.0690831	0.0701371	0.0708144	0.0721488	0.0726401	0.0738574	0.0748075	0.0756134	0.0768882	0.0782613	0.0795446	0.0808098	0.0821732	0.0832233	0.0842388	0.0853947	0.086336	0.0877227	0.0895497	0.0918229	0.0945662	0.0977071	0.101794	0.108486	0.119117	0.13026	0.144027	0.160533	0.176924	0.193371	0.212863	0.234602	0.252623	0.268259	0.284781	0.295848	0.30168	0.311661
0.0573199	0.0550496	0.053386	0.0562974	0.0588643	0.0615887	0.0636184	0.065873	0.0687288	0.070751	0.0730942	0.0741371	0.0758612	0.0769999	0.0778748	0.0792537	0.0802619	0.081336	0.0826615	0.0838333	0.0847293	0.0856442	0.0871017	0.0880434	0.0891227	0.0902538	0.0913589	0.0921422	0.0932172	0.0946053	0.0959282	0.0974314	0.0992189	0.100896	0.103164	0.108137	0.116282	0.124919	0.13589	0.149895	0.163186	0.176977	0.19324	0.211659	0.227597	0.24142	0.255642	0.265259	0.270996	0.280311
0.0400616	0.0323818	0.0303305	0.0279203	0.0274267	0.0281604	0.0284677	0.0291157	0.0297115	0.0302952	0.0304908	0.0308603	0.0314329	0.0315611	0.031941	0.0327496	0.0326447	0.0330601	0.0333723	0.0335168	0.0338571	0.0342461	0.0347506	0.0350678	0.0357244	0.0361678	0.0367675	0.0372419	0.0378327	0.038423	0.0390231	0.03977	0.0407079	0.0420481	0.0434732	0.0462337	0.050618	0.0554563	0.0619947	0.0694636	0.0771058	0.0853553	0.0950382	0.105823	0.114535	0.122532	0.130861	0.136245	0.140129	0.145911
0.0411418	0.0344473	0.0308525	0.0297398	0.0288259	0.028448	0.0280146	0.0277913	0.0282182	0.0282221	0.0284207	0.0287093	0.0290464	0.0289465	0.029109	0.0295306	0.0294964	0.0298528	0.0301205	0.0302631	0.030645	0.0311177	0.0314593	0.0319954	0.0324381	0.0328488	0.033464	0.0338813	0.0340611	0.0346667	0.0352569	0.0358761	0.0368772	0.0379581	0.0394238	0.0421026	0.0463615	0.0512847	0.0580372	0.0661829	0.0746504	0.0840648	0.0953408	0.107663	0.118181	0.128153	0.138561	0.146015	0.150982	0.157839
0.0476005	0.0408262	0.0394547	0.0393849	0.0387142	0.0395006	0.0403336	0.0421016	0.0428027	0.0438999	0.0448274	0.0458205	0.046906	0.0479356	0.0485301	0.0494495	0.0501484	0.0505763	0.0516625	0.0523439	0.053236	0.0543358	0.055242	0.0563639	0.0573414	0.058223	0.0592128	0.0601204	0.0607634	0.0619599	0.0630198	0.0646675	0.0670719	0.0691798	0.0721629	0.0775516	0.0850985	0.0936683	0.104258	0.116592	0.129121	0.141431	0.155936	0.172239	0.185662	0.196457	0.209257	0.218124	0.22315	0.230044
0.0504915	0.0439713	0.0431975	0.0426872	0.0433411	0.0439144	0.044934	0.0464918	0.0474709	0.0477227	0.0495581	0.0502425	0.0509318	0.0519335	0.0524678	0.0537918	0.0541474	0.0551336	0.0560652	0.0571505	0.0581399	0.0591759	0.0601726	0.0611859	0.0622231	0.0629309	0.064101	0.0646235	0.0656598	0.0668885	0.0680687	0.0697937	0.0720297	0.0748138	0.0781491	0.0837233	0.0925017	0.102015	0.113625	0.127338	0.14146	0.155521	0.171476	0.189463	0.204462	0.216857	0.23049	0.239837	0.244861	0.253022
0.0525236	0.0473424	0.0463955	0.0460643	0.047601	0.048663	0.0498486	0.0512774	0.0528235	0.053295	0.054287	0.0556987	0.057128	0.0579755	0.0586249	0.0591216	0.0598288	0.0608608	0.0616837	0.0625062	0.0634489	0.0644698	0.0655844	0.0663812	0.067538	0.0684352	0.0692601	0.0700187	0.0707333	0.0717293	0.0729729	0.0742705	0.0759646	0.0779436	0.0805183	0.0852195	0.0927501	0.100868	0.111219	0.124063	0.137258	0.151269	0.168113	0.187136	0.203426	0.21796	0.233236	0.243919	0.250401	0.260387
0.0558901	0.0537599	0.0511474	0.0528237	0.0546218	0.0564676	0.0584096	0.0602076	0.0615094	0.0626064	0.0643473	0.0648849	0.0659165	0.0670712	0.0678198	0.0685735	0.0693905	0.0698619	0.0708713	0.0720253	0.0727227	0.073591	0.0745311	0.0754138	0.0765156	0.0772135	0.0781406	0.0787173	0.0795049	0.0806626	0.0819261	0.0833393	0.0852112	0.0874881	0.0904113	0.0957766	0.104153	0.112704	0.124102	0.138502	0.152559	0.167193	0.184682	0.204447	0.221801	0.236931	0.252843	0.264036	0.271221	0.281913
0.0427265	0.0351051	0.0324765	0.0300728	0.0300998	0.0301306	0.0305632	0.0309785	0.0313989	0.0320796	0.0319511	0.0320089	0.0330584	0.0332987	0.0335275	0.0339603	0.0341262	0.0345849	0.0345356	0.0347864	0.0352851	0.0357638	0.0362871	0.036673	0.0374337	0.0378109	0.038235	0.0387237	0.0392615	0.0398904	0.0406643	0.0415376	0.0429243	0.0446736	0.0467104	0.0503338	0.0560218	0.0621306	0.0699786	0.0791356	0.0879173	0.0970876	0.107822	0.119488	0.128639	0.137157	0.146167	0.15166	0.15568	0.161568
0.0441459	0.0377966	0.0354574	0.0340942	0.0344264	0.0343032	0.0350728	0.034779	0.0359688	0.0364005	0.0367733	0.037367	0.0378099	0.0385128	0.0388628	0.0392564	0.039635	0.0399649	0.0405856	0.040794	0.0414952	0.0419909	0.042505	0.0433338	0.0440196	0.0444833	0.0450853	0.0456372	0.0459529	0.0467408	0.0473103	0.0481179	0.0494602	0.0506769	0.0522802	0.0555722	0.0607317	0.0662035	0.0735338	0.0818977	0.0903683	0.0992078	0.10976	0.121403	0.1308	0.139818	0.149516	0.156434	0.160911	0.167157
0.0494444	0.042887	0.0427073	0.0423895	0.0419688	0.0437428	0.0443604	0.0458398	0.0468157	0.0477295	0.0481445	0.04938	0.050164	0.0513309	0.0515509	0.052553	0.0533112	0.0541739	0.0550355	0.0557043	0.056513	0.0575854	0.0582635	0.0592437	0.0602511	0.0611381	0.0619517	0.0624621	0.0633077	0.0640643	0.0649189	0.0658626	0.0677209	0.0693197	0.071415	0.0757024	0.0823182	0.0895213	0.0990696	0.110303	0.121344	0.132681	0.145988	0.161274	0.173774	0.184473	0.19671	0.205615	0.210782	0.2181
0.0558711	0.0503736	0.0485563	0.0488744	0.0511598	0.0519296	0.0536561	0.0553719	0.0561315	0.0568632	0.0579324	0.0588667	0.0598287	0.0601149	0.0609247	0.0619119	0.0624828	0.0633507	0.0642334	0.0650917	0.0658452	0.0668095	0.067802	0.0688016	0.0697783	0.07076	0.0716999	0.0721128	0.0727432	0.0738459	0.0748383	0.07608	0.0779477	0.0801677	0.0830185	0.0878756	0.0963783	0.105576	0.116832	0.130889	0.145673	0.160513	0.178019	0.198032	0.214784	0.22946	0.245351	0.256449	0.262864	0.272705
0.0514571	0.0464344	0.0468135	0.0467812	0.0494749	0.0512996	0.053126	0.0549862	0.056954	0.0577305	0.0589068	0.0604581	0.0620746	0.0628611	0.0639187	0.0651551	0.066038	0.0671619	0.0681152	0.0689727	0.0702913	0.0715141	0.0724685	0.0735411	0.0746629	0.0757947	0.07649	0.0774094	0.0781682	0.078955	0.0798133	0.0810957	0.0828209	0.0844963	0.0868134	0.0913531	0.0987566	0.106436	0.116215	0.128007	0.139929	0.151984	0.166498	0.182994	0.196657	0.208553	0.221951	0.230481	0.23578	0.244511
0.0494182	0.045795	0.0423094	0.0426324	0.0435916	0.0449738	0.0459894	0.0472302	0.0481073	0.0488103	0.0503648	0.0506974	0.0520579	0.0526342	0.0535359	0.0543225	0.0552407	0.055823	0.0567844	0.0578824	0.0584737	0.0594385	0.060535	0.0616006	0.0625846	0.0633933	0.0644527	0.0650131	0.0656807	0.0670259	0.0683126	0.0700503	0.0721358	0.074692	0.0777981	0.0830942	0.0911817	0.0999865	0.110909	0.124435	0.137945	0.151792	0.167478	0.184938	0.199959	0.212523	0.225823	0.234782	0.240343	0.249335
0.0455125	0.0381239	0.0349571	0.0328541	0.0328059	0.0333885	0.033893	0.034789	0.0356217	0.036241	0.0367354	0.0371589	0.0380339	0.0385585	0.0387839	0.0395699	0.039836	0.0399468	0.0404145	0.0406016	0.0411724	0.0420488	0.0427822	0.0432165	0.0441433	0.044806	0.0453464	0.046259	0.0468196	0.0478391	0.04879	0.050325	0.0522412	0.0546833	0.0573886	0.0621698	0.0688107	0.0760117	0.0850149	0.0948755	0.104254	0.113938	0.125142	0.137537	0.146764	0.1551	0.164058	0.16937	0.172785	0.17899
0.0430504	0.0375348	0.0346055	0.0337136	0.0341037	0.0328954	0.0335614	0.0342671	0.0346429	0.0352238	0.0354699	0.035734	0.0363659	0.0365711	0.0369852	0.0377753	0.0376358	0.03801	0.0385516	0.0387764	0.0393548	0.0398696	0.0403016	0.040807	0.0415609	0.0419409	0.0426026	0.0430698	0.0433149	0.0441086	0.0446898	0.0452069	0.0463142	0.0475541	0.0489472	0.0518834	0.0564931	0.0616121	0.0685376	0.0764834	0.0850285	0.0945479	0.106002	0.118912	0.129961	0.140027	0.150815	0.157805	0.162566	0.168753
0.0512596	0.0465679	0.0457143	0.046091	0.0449283	0.047163	0.0478452	0.0493706	0.0498777	0.0506147	0.0518168	0.0526354	0.0538386	0.0544241	0.0551428	0.0557995	0.0565571	0.0569581	0.0580231	0.0584156	0.0589955	0.0600804	0.0607339	0.0618757	0.0625565	0.0633256	0.0639833	0.0645968	0.0652371	0.0662295	0.0666783	0.0678744	0.0696545	0.0711332	0.0732479	0.0776048	0.0845405	0.0919138	0.101734	0.113346	0.124989	0.137132	0.151751	0.168193	0.182139	0.19395	0.207226	0.216663	0.222178	0.229569
0.0487364	0.0432097	0.0414943	0.0406059	0.0417812	0.0415018	0.0430049	0.0444723	0.0449288	0.0461627	0.0471641	0.0478989	0.0489744	0.0495435	0.0505083	0.0513574	0.0519594	0.0526973	0.0535027	0.0542565	0.054809	0.0558791	0.0569411	0.0579332	0.0587997	0.0597087	0.0604767	0.0610094	0.061674	0.0627522	0.0637836	0.0650832	0.0671438	0.0694051	0.0722479	0.0772236	0.0855598	0.0945548	0.1054	0.118939	0.132811	0.147131	0.163547	0.18255	0.198597	0.212461	0.227608	0.238258	0.244617	0.254045
0.0531159	0.0473556	0.0466364	0.0468423	0.0492872	0.0500096	0.0512798	0.0526318	0.0539829	0.054448	0.0553343	0.0566889	0.0578229	0.0581896	0.0585423	0.0598783	0.0604416	0.0611894	0.0619037	0.0627056	0.0635108	0.0642537	0.0654001	0.0661906	0.0671221	0.0678436	0.0687147	0.0693803	0.0700286	0.0707579	0.0718656	0.0729743	0.0746442	0.0768215	0.0791148	0.0838605	0.0915864	0.0997483	0.110458	0.123192	0.136694	0.150715	0.167382	0.186309	0.20259	0.216877	0.23231	0.242404	0.248372	0.258255
0.0592675	0.0561149	0.0540362	0.0546976	0.0576501	0.0582566	0.0595973	0.0624494	0.0638804	0.0647069	0.0668023	0.0672263	0.068068	0.0692433	0.0702773	0.0710918	0.0720262	0.0726217	0.0735261	0.0742542	0.0751985	0.076135	0.0771633	0.0781116	0.0790461	0.0800205	0.0809909	0.081547	0.0821322	0.0834605	0.0849955	0.0864199	0.0888031	0.091459	0.0949409	0.100724	0.110241	0.120201	0.132361	0.147392	0.16161	0.175392	0.191545	0.209345	0.22386	0.236044	0.249179	0.257251	0.261972	0.270364
0.0452902	0.0391826	0.0360057	0.0331386	0.0332712	0.0335946	0.0340691	0.0349011	0.0356788	0.0364313	0.0366874	0.0370088	0.0378397	0.0380907	0.0382116	0.0391048	0.0391306	0.0391866	0.0395667	0.0398032	0.0399885	0.0405424	0.0410964	0.0412451	0.0420248	0.0423882	0.0428687	0.0435688	0.044016	0.0449331	0.0454864	0.046565	0.0479713	0.0495569	0.0517203	0.0552678	0.0608833	0.0670711	0.0748151	0.0834847	0.092056	0.100885	0.110791	0.122074	0.130976	0.138897	0.146959	0.152014	0.155833	0.161551
0.0564238	0.0512774	0.0484115	0.0479964	0.0479108	0.0480871	0.0484552	0.0497101	0.0513458	0.0516696	0.0526418	0.0534454	0.0546069	0.0554865	0.0561093	0.0568561	0.0572009	0.0576871	0.0582391	0.0584082	0.059335	0.0603308	0.0610825	0.0620099	0.0631636	0.0637792	0.0648611	0.0655491	0.0662057	0.0675295	0.0687994	0.0705587	0.0733953	0.0763619	0.0799065	0.086182	0.0950816	0.104506	0.116277	0.128905	0.140984	0.152722	0.166624	0.181725	0.193025	0.203164	0.214271	0.220836	0.224167	0.230437
0.0513718	0.0475962	0.0474118	0.046356	0.0460442	0.0467751	0.047773	0.048922	0.0494782	0.0503758	0.0514248	0.0522716	0.0529909	0.0536884	0.0542815	0.0549651	0.0554113	0.0559738	0.0564605	0.0571142	0.057769	0.0585135	0.0589029	0.0599844	0.0604388	0.060965	0.0615739	0.0621781	0.0627336	0.0634713	0.0640298	0.0649644	0.0663967	0.0676842	0.0692578	0.0730369	0.0787394	0.0849803	0.0934385	0.103599	0.114128	0.125019	0.13841	0.153796	0.166811	0.177585	0.190164	0.198979	0.204027	0.211221
0.0494509	0.0432384	0.0409217	0.0401587	0.0423365	0.0415844	0.0424787	0.0443827	0.0446994	0.0453136	0.0465157	0.0472745	0.0479858	0.048724	0.0494353	0.0503475	0.0506277	0.0515525	0.0520612	0.052763	0.0532586	0.0542203	0.0550071	0.0559475	0.0566292	0.0574937	0.0584514	0.0589029	0.0596694	0.0605321	0.0616203	0.0627804	0.0642393	0.0660662	0.0686005	0.0727525	0.0797395	0.0871982	0.0964647	0.107819	0.119829	0.132356	0.147086	0.164182	0.178559	0.191285	0.20458	0.214037	0.219334	0.227384
0.0485987	0.0409496	0.0379492	0.0366785	0.0374104	0.0374436	0.0373809	0.0382301	0.0384626	0.0386456	0.0391393	0.0398371	0.0409962	0.0415419	0.0416128	0.0424985	0.0428491	0.0433526	0.0437405	0.0442529	0.044784	0.0456723	0.046324	0.0470206	0.0478507	0.048515	0.0492397	0.0498913	0.0504886	0.0511664	0.0519839	0.0530146	0.0541744	0.0555939	0.057419	0.0609644	0.0666031	0.0728035	0.0810458	0.0915584	0.103313	0.115938	0.131496	0.148964	0.164396	0.178152	0.192071	0.201872	0.20791	0.216956
0.0516236	0.0464853	0.0427102	0.0419522	0.0434641	0.0433831	0.0442609	0.0451908	0.0461741	0.0467465	0.0482284	0.0486162	0.0490381	0.0498857	0.0505109	0.0510198	0.0513364	0.0517575	0.0525828	0.0528248	0.0531031	0.05388	0.0545797	0.0552736	0.0558138	0.0563967	0.0571717	0.0576575	0.0579841	0.0589224	0.0598504	0.060787	0.0622578	0.0640783	0.066313	0.0706464	0.077532	0.0848273	0.094317	0.106886	0.119669	0.132916	0.148628	0.16635	0.181774	0.194887	0.208294	0.217768	0.223454	0.232394
0.0462431	0.0388375	0.0359584	0.032693	0.0321847	0.0331855	0.0337772	0.0342172	0.0345849	0.0352577	0.035406	0.0357031	0.0362545	0.0365851	0.0365899	0.03738	0.0372969	0.0373566	0.0376032	0.0376699	0.0378672	0.0383339	0.0389812	0.0390457	0.0398501	0.0402691	0.0407288	0.0414436	0.0418512	0.0426769	0.0433856	0.0443093	0.0456005	0.047005	0.0486406	0.0517271	0.0565798	0.0619322	0.0688517	0.0769657	0.0852905	0.0936757	0.104036	0.115274	0.124353	0.132753	0.141172	0.146937	0.150764	0.156456
0.0482513	0.043457	0.0395642	0.0386098	0.038731	0.0380446	0.0387036	0.0396176	0.0401458	0.0399806	0.0413223	0.041932	0.042508	0.0424532	0.0430945	0.0436674	0.04375	0.0440557	0.0445567	0.044646	0.0450149	0.0453642	0.0458573	0.046241	0.0469173	0.0472411	0.047844	0.0484909	0.0487104	0.0494332	0.0500917	0.0508785	0.0521844	0.0534617	0.0549896	0.0583717	0.063588	0.069241	0.0768581	0.085517	0.0944583	0.103769	0.115245	0.1279	0.137975	0.147515	0.157515	0.164437	0.168367	0.17446
0.0589724	0.0526876	0.0515309	0.0508444	0.0494649	0.0501389	0.0510455	0.0525757	0.0527738	0.0536914	0.0542961	0.0553253	0.0561662	0.0567331	0.0567845	0.0576069	0.0576419	0.0580238	0.0585887	0.0588438	0.0593108	0.0599485	0.0605727	0.0616489	0.0623549	0.0630277	0.0635693	0.0641735	0.0648124	0.0657273	0.0666996	0.0680871	0.0705161	0.0727484	0.0757085	0.0813142	0.0894985	0.0986913	0.110335	0.123598	0.136949	0.150091	0.165507	0.182656	0.196235	0.207434	0.220184	0.22879	0.233247	0.239655
0.0552112	0.0490219	0.0473045	0.0459003	0.0467514	0.047189	0.0488316	0.0497641	0.0505915	0.0515583	0.0525747	0.053304	0.0543324	0.0549699	0.0552656	0.0559772	0.0562349	0.0569538	0.0574501	0.0579575	0.0585101	0.0592415	0.0599469	0.0608779	0.0613962	0.0621863	0.0628316	0.0632355	0.0638304	0.064627	0.0654288	0.0668601	0.0685722	0.0703546	0.0729549	0.0773568	0.0848761	0.0931835	0.103452	0.116153	0.129669	0.143698	0.160231	0.178959	0.19517	0.209471	0.224376	0.235088	0.241285	0.250257
0.0568845	0.0507948	0.0495829	0.0501964	0.0509801	0.0522009	0.0532799	0.0543021	0.0565173	0.0570225	0.0578057	0.0593646	0.0601304	0.0610921	0.0618402	0.0629119	0.0631994	0.0637221	0.0642489	0.0647079	0.0653047	0.0660255	0.0668383	0.0675142	0.0686756	0.0693894	0.070157	0.0707434	0.0713748	0.071985	0.0731285	0.074334	0.0762098	0.0783282	0.0811359	0.0864567	0.0950582	0.104051	0.11569	0.129843	0.144044	0.158218	0.175104	0.193372	0.208308	0.221511	0.235441	0.244288	0.249305	0.257729
0.0622532	0.0583803	0.0541731	0.0547464	0.0562499	0.0572825	0.0586424	0.0594065	0.0606985	0.0619574	0.0633495	0.0639482	0.0650036	0.0658862	0.0664345	0.067194	0.0676379	0.0680152	0.0684779	0.068797	0.0693135	0.0698453	0.0709235	0.0718225	0.0727044	0.073681	0.0747	0.0751497	0.0757781	0.0768148	0.0780864	0.0798127	0.0821201	0.084545	0.0881131	0.0941351	0.103854	0.114104	0.12703	0.143047	0.158473	0.173785	0.191412	0.210546	0.226648	0.239892	0.253729	0.262646	0.267351	0.276052
0.0465986	0.0390205	0.0368886	0.0346755	0.0337897	0.0345024	0.035107	0.0360727	0.0364676	0.0377751	0.037865	0.0382749	0.0390646	0.0394109	0.0393885	0.0400522	0.0399508	0.0399371	0.0399337	0.0399651	0.0401962	0.0403675	0.0409281	0.0408284	0.0416549	0.0419357	0.0423909	0.0430985	0.0433585	0.0439597	0.0445718	0.0451724	0.046248	0.0472888	0.0487522	0.0514162	0.0556935	0.0604662	0.0667407	0.0736988	0.0805917	0.0875791	0.0960493	0.105245	0.11252	0.119073	0.126003	0.130144	0.13298	0.13761
0.0489443	0.0422037	0.0391687	0.0369813	0.0371948	0.0364458	0.0371993	0.0370959	0.0383363	0.0384952	0.0388716	0.0394148	0.0396496	0.0398321	0.0398377	0.0403654	0.0403704	0.0403207	0.040582	0.0404148	0.0405815	0.0408161	0.0411873	0.0414749	0.0420082	0.0421937	0.0427217	0.0432727	0.0435091	0.0441806	0.0448713	0.0456434	0.0468083	0.048076	0.0496298	0.0527889	0.0577585	0.0630627	0.0704914	0.0789477	0.0876062	0.0971247	0.10877	0.12158	0.132064	0.141863	0.152325	0.159331	0.163653	0.169892
0.0534315	0.0463496	0.045401	0.0442982	0.0430515	0.0434251	0.0447535	0.0462067	0.0465571	0.0474729	0.0483352	0.0489399	0.0500194	0.050943	0.0514611	0.0519686	0.0521451	0.0523047	0.0528982	0.0532546	0.0536232	0.0544431	0.0550007	0.0559927	0.0566426	0.0572223	0.0579458	0.0584822	0.0591605	0.0602526	0.0612479	0.06261	0.0645275	0.0664675	0.0690464	0.074133	0.0811787	0.0892686	0.0995906	0.111544	0.123221	0.134972	0.148719	0.16442	0.176956	0.187586	0.199397	0.207565	0.212164	0.218689
0.0502524	0.0443443	0.0415963	0.0400802	0.0403648	0.0400424	0.0411866	0.041943	0.0427429	0.0434318	0.0441645	0.0447626	0.0456236	0.0457511	0.0464206	0.0468455	0.0468213	0.0471268	0.0474126	0.0476796	0.047907	0.0483876	0.048838	0.0496417	0.0496799	0.0503955	0.0509694	0.0510932	0.0516721	0.0523835	0.0530612	0.0539904	0.0552097	0.0566088	0.0585626	0.0619405	0.0678872	0.0744689	0.0828687	0.0933422	0.104494	0.11632	0.130303	0.146285	0.160057	0.172054	0.184744	0.193579	0.198289	0.205565
0.0568994	0.0496718	0.0478609	0.0469371	0.0484047	0.0487711	0.049511	0.0513889	0.052617	0.0533176	0.0538977	0.0555589	0.0564864	0.0571127	0.0574488	0.0581956	0.0583592	0.0591465	0.0593592	0.0595351	0.0600212	0.060573	0.0611844	0.0619353	0.0628682	0.0636136	0.0642733	0.0648701	0.0654861	0.0661543	0.0672612	0.0680067	0.0694308	0.0710554	0.0730878	0.0773467	0.084267	0.091778	0.101239	0.112866	0.124667	0.136694	0.150848	0.166869	0.180415	0.192159	0.204885	0.213141	0.217705	0.225295
0.0507156	0.0451396	0.0410548	0.0402517	0.0414855	0.0414267	0.0422277	0.0434038	0.0447646	0.0451223	0.0465782	0.0470129	0.0475607	0.0485095	0.0490726	0.0494103	0.0497532	0.0497633	0.0498574	0.0500746	0.0500472	0.0505526	0.0514113	0.0520221	0.052635	0.0531979	0.0537763	0.0542166	0.0547128	0.0554534	0.0562437	0.0570865	0.0582554	0.0596046	0.0618827	0.0657034	0.0719804	0.0788271	0.0875916	0.0986368	0.10928	0.120648	0.133383	0.148055	0.160395	0.170974	0.182064	0.189587	0.193789	0.200539
0.0427803	0.0353763	0.0325903	0.0298435	0.0287129	0.0297849	0.0301463	0.0306541	0.0312622	0.0321635	0.0324735	0.0329346	0.0334171	0.0335251	0.033754	0.0343502	0.0340195	0.0344402	0.0346569	0.03454	0.0348781	0.0353949	0.0361726	0.0362652	0.0372035	0.0381069	0.0387061	0.0393292	0.0401596	0.041159	0.0420955	0.0431309	0.0446412	0.0463973	0.0483311	0.0515698	0.0562431	0.0612811	0.0676484	0.0745446	0.0811032	0.0877668	0.0955896	0.103991	0.110288	0.116025	0.122395	0.125865	0.128166	0.132063
0.0468159	0.0403816	0.0360047	0.0339492	0.0332602	0.0336372	0.033501	0.034052	0.0351648	0.0357756	0.035714	0.0368099	0.0372781	0.0372962	0.0374448	0.037963	0.0378866	0.0382079	0.038182	0.0384371	0.0385885	0.039008	0.0392336	0.0397677	0.0402994	0.0409184	0.0416731	0.0422809	0.0426354	0.0434619	0.0441207	0.0451773	0.0465887	0.0479164	0.0495286	0.0526085	0.0572221	0.0621584	0.0686259	0.0758947	0.0830862	0.0904281	0.0992797	0.108924	0.116188	0.123158	0.130927	0.135716	0.138208	0.142585
0.0493372	0.0419909	0.0398981	0.0380978	0.0363335	0.0370894	0.0379285	0.0382515	0.0386938	0.039032	0.0395793	0.04007	0.0404521	0.0406232	0.0407893	0.0411239	0.0409453	0.040835	0.0411309	0.0409875	0.041175	0.0414395	0.041767	0.0422859	0.0424725	0.0427684	0.0433588	0.0437494	0.0442002	0.0448039	0.0453629	0.0460695	0.0473388	0.0482299	0.0496814	0.0525956	0.0571908	0.062117	0.0689471	0.0773635	0.0864011	0.0965504	0.108732	0.123197	0.135484	0.146364	0.157676	0.16625	0.171031	0.177561
0.0586735	0.0521448	0.0495003	0.0486489	0.0504651	0.0502911	0.0526824	0.0538263	0.0554073	0.0566522	0.0577364	0.0589466	0.0599765	0.0604094	0.0610697	0.0617775	0.0616426	0.0623744	0.0625159	0.062946	0.0632859	0.0639968	0.0646132	0.0654529	0.066262	0.066786	0.0678313	0.0684318	0.0693068	0.0705139	0.0715727	0.0729684	0.0747022	0.0766692	0.0792926	0.0835772	0.0907054	0.0980751	0.107175	0.118013	0.128844	0.13983	0.152995	0.168179	0.180717	0.191192	0.20268	0.210268	0.214121	0.220716
0.0471621	0.0400614	0.0372628	0.0368081	0.0370197	0.0371652	0.0377874	0.0389761	0.0401699	0.0406781	0.0421713	0.0431854	0.0441112	0.0447111	0.0450444	0.0456841	0.0459683	0.0461979	0.0464078	0.0467462	0.0470391	0.0477405	0.0483065	0.0491471	0.0499868	0.0507091	0.0513402	0.0518585	0.0523512	0.0531947	0.0541282	0.0552021	0.0566239	0.0582577	0.0605134	0.0645198	0.0709151	0.0775365	0.0858568	0.0957137	0.105375	0.115027	0.126244	0.138755	0.148854	0.157401	0.166821	0.172704	0.175545	0.181203
0.0559936	0.0528017	0.0502535	0.0518631	0.0538834	0.056332	0.0587552	0.0614554	0.0637659	0.0659388	0.0687787	0.0702923	0.0715892	0.0733352	0.0747115	0.0764163	0.0773647	0.0777755	0.0784499	0.0795015	0.0802686	0.0812406	0.0830833	0.0844547	0.0862104	0.0876489	0.0895873	0.0908179	0.0919909	0.0936475	0.0951738	0.0962655	0.098003	0.0998002	0.102028	0.106603	0.11406	0.120942	0.129352	0.139512	0.148257	0.155877	0.16533	0.176258	0.184621	0.190571	0.197501	0.200908	0.201547	0.205754
[truncated: 126 more columns]
