# Supplementary material for: Recognition of maize seed varieties based on hyperspectral imaging technology and integrated learning algorithms
Source: PeerJ Comput Sci. 2023 May 10;9:e1354. doi: 10.7717/peerj-cs.1354 (PMC10280578; doi:10.7717/peerj-cs.1354)
Supplement: Supplemental Information 3 — Each row represents the hyperspectral data information of a seed. There are 60 rows representing the data information of 60 seeds. Each column represents the band information of each seed, and there are 176 columns in the table, representing 176 bands. [file peerj-cs-09-1354-s003.xls]

## Sheet: Sheet1
0.0395306	0.0310621	0.0283987	0.0250533	0.0244747	0.024401	0.0246803	0.0248968	0.0260935	0.0261949	0.0264771	0.0263195	0.0269775	0.0266917	0.0270567	0.0272909	0.0270682	0.027161	0.0272178	0.0272752	0.0276464	0.027987	0.0284713	0.0286046	0.0292879	0.0295387	0.0299933	0.030438	0.0309258	0.0315885	0.0322164	0.0328171	0.0338672	0.0350707	0.036494	0.0388978	0.0427411	0.0467233	0.0520166	0.0578748	0.0635984	0.0695903	0.0764635	0.0841732	0.0901676	0.0955255	0.101361	0.105098	0.108093	0.112345
0.0436394	0.0384063	0.0352932	0.0334635	0.0325581	0.032515	0.0334162	0.0337422	0.0347913	0.0352216	0.0362753	0.0366616	0.0371808	0.0375811	0.0380051	0.0386256	0.0385453	0.0386184	0.0389419	0.0392185	0.0395434	0.0402761	0.040714	0.0413872	0.0422044	0.0427671	0.0435191	0.0442418	0.0448968	0.0458434	0.0466593	0.04778	0.0494831	0.0510111	0.0530863	0.0567451	0.0621557	0.0677553	0.0751755	0.0831723	0.0912978	0.0995639	0.109192	0.119781	0.127678	0.135139	0.143102	0.147824	0.15076	0.155932
0.0475399	0.0413318	0.0377524	0.0377975	0.0366667	0.0381616	0.0390445	0.0393882	0.0406678	0.0416004	0.0428624	0.0438087	0.0442629	0.0452469	0.0452672	0.0459343	0.0459066	0.0461456	0.0467465	0.0469816	0.0475773	0.0485121	0.0490919	0.0497857	0.0505514	0.0512451	0.0518435	0.052503	0.0533423	0.0541835	0.0549648	0.055984	0.0575914	0.0591804	0.0612164	0.0649983	0.0708317	0.0768209	0.0853899	0.0951291	0.105224	0.116025	0.128883	0.1436	0.155639	0.165803	0.176858	0.184596	0.188889	0.195333
0.0555381	0.0488507	0.0472463	0.0462843	0.0463322	0.0474335	0.0489722	0.0503525	0.052033	0.0535145	0.0550669	0.0559422	0.0570888	0.0573667	0.0582869	0.0589974	0.0588845	0.0599367	0.0600678	0.0608355	0.061537	0.0625851	0.0632507	0.0642325	0.0649955	0.0658005	0.0668102	0.0675369	0.068457	0.069779	0.0709079	0.0722189	0.0743988	0.0765886	0.0796504	0.0846473	0.0929932	0.102185	0.113549	0.12744	0.142055	0.15715	0.174648	0.194246	0.211256	0.22549	0.240363	0.250379	0.255995	0.264382
0.0604879	0.0564554	0.0542146	0.0535671	0.0548749	0.056643	0.0578356	0.0593366	0.061319	0.0625491	0.0643764	0.0653352	0.066159	0.0665071	0.0667607	0.0677246	0.0679072	0.0680937	0.068417	0.0686209	0.0693782	0.0701376	0.0712354	0.0717591	0.0727883	0.0733362	0.0742812	0.0751136	0.0758946	0.0769381	0.0781394	0.0793846	0.0810617	0.0831716	0.085875	0.0910027	0.099199	0.107693	0.118451	0.13157	0.144503	0.157993	0.173949	0.192366	0.20708	0.220176	0.234092	0.243099	0.247833	0.25694
0.0521218	0.0481291	0.0431559	0.0426015	0.0431396	0.0440953	0.044753	0.046136	0.0475321	0.048334	0.0497377	0.0500227	0.0503667	0.0514753	0.0522204	0.0525856	0.0527214	0.0526869	0.0529609	0.0535449	0.0540618	0.0547555	0.0555959	0.0564544	0.0570797	0.0576139	0.0586299	0.0591994	0.0596676	0.0609349	0.0620893	0.0637352	0.0658479	0.0682476	0.0717084	0.0772126	0.0856044	0.0945528	0.105671	0.119871	0.133972	0.148552	0.16524	0.183451	0.199241	0.211872	0.224878	0.233339	0.238233	0.246684
0.0397226	0.0324313	0.0295087	0.0259481	0.0257298	0.0257243	0.0258133	0.0261448	0.027105	0.0275575	0.0272622	0.0276958	0.0282079	0.0282423	0.0285602	0.0287325	0.0285031	0.0287744	0.0289901	0.0290426	0.0293984	0.0297149	0.0303046	0.0304375	0.0311605	0.0317165	0.0322739	0.0327775	0.0332208	0.0338537	0.0345026	0.0354101	0.0367274	0.0382304	0.0401312	0.0430739	0.0478879	0.0531172	0.0597263	0.0672303	0.0744986	0.0821563	0.0907632	0.100095	0.107336	0.113728	0.120229	0.124347	0.127348	0.132141
0.0447016	0.0374003	0.0343737	0.0324243	0.0324295	0.0319068	0.0322132	0.033104	0.0342427	0.0348083	0.0354977	0.0365093	0.0373991	0.0381407	0.0384758	0.0394541	0.0395067	0.040002	0.0405031	0.0410554	0.0417784	0.0426801	0.0435698	0.0445165	0.0458422	0.0467937	0.0480722	0.0489046	0.0498203	0.051319	0.0525922	0.054333	0.0569622	0.0597179	0.0631041	0.0686358	0.0765044	0.0847425	0.0950318	0.106452	0.117352	0.12816	0.140594	0.154353	0.164443	0.173639	0.183373	0.189294	0.192655	0.198532
0.0566211	0.0515363	0.0500526	0.0495075	0.0482279	0.0495194	0.0511285	0.0522831	0.0534736	0.0552423	0.0569072	0.0578805	0.0589359	0.0604337	0.0607471	0.061936	0.0623151	0.0625243	0.0635032	0.0640612	0.0649951	0.065841	0.0666428	0.0678216	0.068793	0.0694786	0.0703929	0.0712674	0.0723027	0.0736141	0.0746599	0.0761948	0.0785794	0.0805275	0.08316	0.0885805	0.0963875	0.105042	0.116419	0.129495	0.14253	0.156189	0.172615	0.191304	0.206345	0.219204	0.233291	0.243196	0.248614	0.256388
0.0542256	0.0486241	0.0472938	0.0468831	0.0475841	0.0486395	0.0494662	0.0512367	0.05366	0.0545185	0.0563507	0.0574112	0.0587075	0.0595465	0.060356	0.0612135	0.0616467	0.0626317	0.0633339	0.064459	0.0650909	0.0661593	0.0670538	0.0681763	0.0690277	0.0698429	0.0708586	0.0714675	0.0724661	0.0738952	0.0749547	0.0761969	0.0780729	0.0800976	0.0825342	0.0868126	0.0944827	0.10281	0.112867	0.125077	0.137985	0.150592	0.165727	0.182942	0.197646	0.209816	0.22342	0.232296	0.23756	0.245207
0.0680133	0.0638811	0.0626627	0.0624586	0.0645121	0.0662503	0.0685774	0.0699771	0.0722126	0.074153	0.0764094	0.0783937	0.0790468	0.0802338	0.0807035	0.0818943	0.0826628	0.0837078	0.0840813	0.0849075	0.0861132	0.0874363	0.0886477	0.0895051	0.091009	0.0919926	0.0928786	0.0940881	0.0953076	0.0968477	0.0984966	0.100354	0.102509	0.104964	0.108231	0.113825	0.12356	0.133745	0.146575	0.1617	0.176805	0.192047	0.210166	0.230574	0.24742	0.261633	0.276768	0.286708	0.291258	0.300638
0.0487651	0.0445585	0.0387074	0.0397541	0.0393042	0.0403317	0.0406537	0.0422754	0.043048	0.0436124	0.0450456	0.0456187	0.0455583	0.046511	0.0469293	0.0472871	0.048084	0.04809	0.0486645	0.048894	0.0494122	0.0500979	0.0508829	0.05166	0.0521471	0.0527976	0.0535371	0.0542301	0.0546273	0.0556532	0.0566715	0.057818	0.059345	0.0611069	0.0635064	0.0676911	0.0745051	0.0816994	0.0908808	0.102509	0.114342	0.126891	0.141516	0.158036	0.172225	0.184366	0.196737	0.204891	0.209721	0.217437
0.0412219	0.0337714	0.031816	0.0291758	0.0290007	0.0291614	0.0296729	0.0306976	0.0315589	0.0321371	0.0320909	0.0328641	0.0333499	0.033626	0.0340362	0.0344835	0.0344129	0.0346776	0.0349131	0.0350731	0.0354048	0.0359081	0.0363024	0.0365162	0.0372027	0.0376245	0.0381136	0.0386528	0.039088	0.0397415	0.0401765	0.0408156	0.04187	0.0431012	0.0446548	0.0474689	0.0520816	0.0571265	0.0634388	0.0707357	0.0777738	0.0849281	0.0933396	0.102691	0.109858	0.11644	0.123408	0.127786	0.13098	0.136151
0.0500576	0.0450773	0.0426699	0.0420597	0.0420377	0.0421436	0.042811	0.0434693	0.0450242	0.0456172	0.0467195	0.0471776	0.0484715	0.0487923	0.0490228	0.0496303	0.0501009	0.0503262	0.050744	0.0512617	0.0516709	0.0524684	0.0529695	0.0534227	0.0544841	0.0548981	0.0557446	0.0564061	0.0567537	0.0577052	0.0584348	0.0595964	0.0611924	0.062898	0.0651247	0.0693028	0.0759251	0.0827688	0.0917329	0.102211	0.112356	0.122873	0.135576	0.149422	0.160371	0.170298	0.180858	0.187607	0.191735	0.198591
0.0589595	0.0510377	0.0502455	0.0486249	0.0483993	0.0494603	0.0503539	0.0517647	0.0528676	0.0541121	0.0550576	0.0558618	0.0572276	0.0585598	0.0586429	0.0595734	0.0600396	0.0606896	0.0613155	0.0621896	0.0627519	0.0638081	0.0647349	0.0658361	0.0667385	0.0676059	0.0685587	0.0692493	0.0701536	0.0714491	0.0726801	0.0743075	0.0769819	0.0793434	0.0824851	0.0885166	0.0971759	0.106727	0.118711	0.132837	0.147083	0.161885	0.179344	0.199453	0.215919	0.229657	0.245089	0.256164	0.262322	0.27117
0.0573966	0.052021	0.0517487	0.0515962	0.0528676	0.0537598	0.0557897	0.0571526	0.0595095	0.0606166	0.0622183	0.0637128	0.0647178	0.0659726	0.0670465	0.0683446	0.0688404	0.0701996	0.0713306	0.0722122	0.0733875	0.0746565	0.0759139	0.077312	0.0783537	0.0794264	0.0806505	0.081612	0.0827095	0.084251	0.0858986	0.0877545	0.090178	0.0929213	0.096469	0.102343	0.112124	0.12266	0.135597	0.151152	0.166839	0.182478	0.2007	0.221562	0.238909	0.253362	0.269507	0.280451	0.286142	0.295674
0.0570574	0.0523428	0.0519924	0.0515593	0.0539038	0.0548106	0.0572786	0.0584933	0.0601952	0.0615631	0.0634323	0.0647793	0.0658725	0.0668816	0.067506	0.0685771	0.0694551	0.070104	0.0711112	0.0719768	0.0728834	0.0738285	0.0751154	0.0756693	0.0770557	0.0777473	0.0786902	0.0794026	0.08043	0.0813817	0.0824992	0.083743	0.0853051	0.0869703	0.0892881	0.0935389	0.101167	0.109205	0.11975	0.133061	0.147271	0.162648	0.181182	0.202827	0.221659	0.238252	0.255818	0.267791	0.275118	0.286064
0.0571904	0.0537825	0.0503328	0.0512937	0.052091	0.0538491	0.0547169	0.0563447	0.0578948	0.0591431	0.0608859	0.0617429	0.062528	0.0637181	0.0643717	0.0654539	0.0662653	0.0667572	0.0675731	0.0682028	0.0689529	0.0699573	0.0711071	0.0723823	0.0731285	0.0742386	0.075062	0.0759376	0.0766943	0.0784348	0.0801767	0.0822059	0.0850817	0.0884701	0.0926375	0.0995087	0.110013	0.120887	0.134418	0.150533	0.16584	0.180985	0.198172	0.216933	0.232689	0.245353	0.258853	0.267126	0.271515	0.279839
0.0434389	0.0363907	0.0344325	0.0319066	0.0312748	0.0321909	0.0326362	0.0331337	0.0341789	0.0349958	0.0350757	0.035748	0.0364538	0.0367827	0.0370535	0.0375032	0.0378178	0.0382037	0.0383032	0.0384891	0.0387292	0.0392514	0.0398581	0.0400827	0.0408251	0.0413533	0.0418234	0.0423625	0.0428895	0.0434422	0.0440167	0.0446671	0.0458083	0.0469732	0.048656	0.0515544	0.0562454	0.0615804	0.0682936	0.0762363	0.0840179	0.0920809	0.101943	0.112491	0.120758	0.128453	0.136722	0.141779	0.145665	0.151369
0.0484638	0.0427372	0.0397423	0.0372568	0.0370698	0.0371422	0.0377771	0.0377727	0.0381593	0.0388752	0.039059	0.0397575	0.040124	0.0399108	0.0405507	0.0407177	0.0411415	0.0413699	0.0417978	0.0417632	0.0425199	0.0427601	0.0431544	0.0437409	0.0444776	0.0449556	0.0457169	0.046135	0.046462	0.0471717	0.0478217	0.0486855	0.0501377	0.0515865	0.0534576	0.057212	0.0629262	0.0693914	0.0779793	0.0883685	0.0994443	0.111487	0.126133	0.142319	0.155442	0.167558	0.180751	0.189449	0.195092	0.202984
0.0548744	0.0482638	0.0477224	0.0476319	0.0477793	0.0494187	0.0509055	0.0526416	0.0537996	0.0551484	0.0565987	0.0578981	0.0591112	0.060587	0.0609194	0.0622159	0.0632582	0.0641359	0.0652259	0.0662342	0.0671883	0.0681706	0.0693203	0.0707277	0.0717352	0.0728138	0.0741547	0.0749552	0.0759966	0.0772199	0.0782435	0.0798657	0.0819878	0.0839077	0.0861662	0.0912745	0.0987668	0.106867	0.117601	0.130151	0.142876	0.155934	0.171558	0.189404	0.204154	0.216571	0.230512	0.240444	0.246158	0.254584
0.0576283	0.0517201	0.052286	0.0519835	0.0539729	0.0549653	0.0570605	0.0589363	0.0606121	0.0617301	0.0631672	0.064643	0.0657537	0.0667039	0.0678674	0.0690451	0.0694926	0.0706586	0.0716298	0.0725658	0.0735883	0.0746687	0.0756035	0.0767127	0.0775898	0.0783996	0.0795541	0.0800526	0.0809264	0.0819828	0.0829734	0.0842661	0.0860132	0.0880453	0.0905853	0.0952341	0.103409	0.112347	0.123429	0.137447	0.152085	0.167551	0.1858	0.207388	0.225835	0.242095	0.259795	0.272356	0.280098	0.291026
0.0582891	0.0535447	0.0531845	0.0547717	0.0572726	0.0593103	0.0612189	0.0627229	0.0649223	0.0661635	0.0673864	0.068931	0.0704602	0.0712857	0.0717186	0.0730039	0.0737996	0.0749142	0.075876	0.0766543	0.0777523	0.0787065	0.079975	0.0806629	0.0819173	0.0827096	0.08369	0.0846186	0.0853498	0.0864077	0.0873917	0.088761	0.090339	0.0921994	0.0945085	0.0991711	0.10734	0.11574	0.126679	0.140466	0.154552	0.16956	0.187724	0.208331	0.225454	0.24071	0.25691	0.267508	0.273407	0.283529
0.0541499	0.0495635	0.0470552	0.0476381	0.0496616	0.0513134	0.0530693	0.0556496	0.0570966	0.0586744	0.0604855	0.0619488	0.0627263	0.0642941	0.0653368	0.0666315	0.0676975	0.0684254	0.0695208	0.0702671	0.0711545	0.0721699	0.0732849	0.074185	0.0752442	0.0761403	0.0770821	0.0778128	0.0783944	0.079834	0.0811215	0.0825361	0.0842709	0.0861468	0.088629	0.0934512	0.101239	0.109175	0.119569	0.13292	0.145998	0.159511	0.175389	0.193501	0.209063	0.222091	0.235807	0.244941	0.250523	0.259625
0.0429902	0.0353296	0.0321711	0.0290221	0.0289904	0.028832	0.0283256	0.0286683	0.0292399	0.0290104	0.028845	0.0289431	0.0294867	0.0294592	0.0292234	0.0295079	0.0294329	0.0293843	0.0293661	0.029259	0.0293633	0.0297273	0.0298724	0.0298725	0.030535	0.0306969	0.0308791	0.0313112	0.0314201	0.0317356	0.0322329	0.0327462	0.0336512	0.0348829	0.0363803	0.0390591	0.0435424	0.048797	0.0558213	0.064221	0.0730901	0.082991	0.0946932	0.107453	0.118188	0.128236	0.138359	0.145221	0.150329	0.157392
0.0476012	0.0416921	0.0382	0.0373816	0.0374406	0.0372974	0.0377019	0.0375983	0.0381675	0.0385632	0.0390803	0.0394127	0.0398698	0.0401059	0.040378	0.0407663	0.041024	0.041347	0.0415714	0.0419123	0.0421846	0.0429275	0.0432268	0.0437741	0.0442093	0.0447461	0.0453302	0.045838	0.0461788	0.0468055	0.0473059	0.0482203	0.0495967	0.0510134	0.0526867	0.0561771	0.0618777	0.0679885	0.0764227	0.0863756	0.0969507	0.108473	0.122342	0.13772	0.150527	0.162831	0.175361	0.184329	0.190174	0.198232
0.0511639	0.0450288	0.0442905	0.044244	0.0448007	0.0463941	0.0475751	0.0489923	0.0504458	0.0515488	0.0531005	0.0539107	0.0549039	0.0560723	0.0566083	0.0578105	0.0587806	0.0593324	0.0602472	0.0610538	0.0620321	0.0630175	0.0640187	0.065013	0.0661183	0.0670281	0.0679564	0.0685552	0.0694043	0.0704096	0.0712217	0.0724041	0.0744364	0.0762046	0.0787944	0.0838928	0.0913936	0.0997776	0.110749	0.123527	0.136654	0.15018	0.165934	0.183144	0.197678	0.209708	0.223457	0.23313	0.238816	0.246798
0.0560506	0.0507901	0.0497275	0.0497105	0.0521075	0.0524295	0.0542559	0.0562102	0.0579495	0.0587831	0.0606675	0.0616619	0.0634089	0.0645249	0.0657911	0.0671208	0.0675697	0.0690582	0.0703194	0.0714892	0.0726961	0.0741213	0.0755138	0.0768923	0.0782433	0.0795053	0.0808019	0.0816557	0.0826041	0.0841725	0.0855994	0.0875067	0.0900648	0.0928567	0.0964517	0.102454	0.11193	0.122344	0.134794	0.149949	0.164978	0.180188	0.197561	0.217741	0.233796	0.247129	0.261953	0.271511	0.276468	0.285091
0.0666107	0.0638741	0.0646259	0.0666479	0.0699562	0.0722391	0.0747786	0.0766621	0.0790211	0.080101	0.0816211	0.083355	0.0850896	0.0860093	0.0872492	0.0884235	0.0893522	0.090456	0.09152	0.0925729	0.0938183	0.0951751	0.0965976	0.0974922	0.0986766	0.0997332	0.100884	0.101859	0.102737	0.103542	0.104659	0.106139	0.107988	0.11011	0.112786	0.117931	0.126812	0.135859	0.147326	0.161855	0.176177	0.190942	0.208908	0.2292	0.246054	0.260616	0.276538	0.286776	0.292396	0.30238
0.0551911	0.0537432	0.0517143	0.0521266	0.053419	0.0551988	0.0568051	0.0586562	0.0599164	0.0613878	0.0632045	0.0636669	0.0647931	0.0659484	0.0666195	0.0672615	0.068249	0.0687626	0.0698745	0.0707777	0.0714049	0.0722745	0.0731001	0.074093	0.0749149	0.0756045	0.0762881	0.0770548	0.0773568	0.078645	0.0796243	0.0809647	0.0828009	0.0843675	0.0868675	0.0915794	0.0992229	0.10698	0.117276	0.130596	0.143507	0.157313	0.172991	0.191239	0.207004	0.219819	0.233592	0.243131	0.24916	0.258304
0.0451477	0.0377887	0.034952	0.0332621	0.0328493	0.0339384	0.0339456	0.0350795	0.035579	0.0367293	0.0374164	0.0380377	0.0392986	0.0395852	0.0400284	0.0412828	0.0412973	0.0417008	0.0419657	0.0424049	0.0428725	0.0436572	0.044376	0.0448596	0.0458427	0.0465758	0.0470657	0.0478174	0.0485624	0.0496116	0.0505371	0.0517583	0.0535822	0.0557364	0.0582455	0.0624569	0.0690534	0.0760349	0.0849016	0.0948366	0.104451	0.113983	0.125509	0.1378	0.147436	0.155864	0.16481	0.170015	0.17378	0.179928
0.0520717	0.0476861	0.0452674	0.0437409	0.0442782	0.0438776	0.0448729	0.0452911	0.0468862	0.0471065	0.0480658	0.0485957	0.0493918	0.0499755	0.0506567	0.0514589	0.0517327	0.052202	0.0527195	0.052775	0.0536714	0.0543205	0.0549832	0.0555827	0.0564799	0.0570198	0.0577233	0.058304	0.0587489	0.0596691	0.060577	0.0616219	0.0631898	0.0650358	0.0669771	0.0712897	0.0777575	0.0848866	0.0941251	0.104778	0.115266	0.126192	0.139243	0.153581	0.164707	0.175133	0.186263	0.193069	0.197343	0.203973
0.051499	0.0452432	0.044603	0.0442532	0.0443074	0.0461492	0.0467451	0.0474595	0.0488082	0.04984	0.0503136	0.0512268	0.0526583	0.0535469	0.0538677	0.0551383	0.0552691	0.0561459	0.0569758	0.0573635	0.0581647	0.0590493	0.0597081	0.060897	0.0618462	0.0624644	0.0631877	0.0637553	0.0643661	0.0652839	0.06599	0.0673144	0.0692638	0.0711572	0.073483	0.0784533	0.0859304	0.0939407	0.104467	0.116793	0.129068	0.1419	0.156783	0.173859	0.187432	0.199357	0.212629	0.221969	0.227366	0.234926
0.0534956	0.0470515	0.0462275	0.0465039	0.0486878	0.0493387	0.0517179	0.0535901	0.0549458	0.056965	0.0581703	0.0597917	0.0609701	0.0618223	0.0628569	0.0641015	0.0646869	0.0660274	0.0666968	0.0676819	0.0687338	0.0697771	0.0706363	0.071694	0.0724786	0.0733002	0.074283	0.0747399	0.0752237	0.0762524	0.0771863	0.0783479	0.0797255	0.0813459	0.0834772	0.0876191	0.094978	0.102888	0.11304	0.125468	0.13843	0.151766	0.167875	0.185883	0.200982	0.214196	0.228295	0.238047	0.243412	0.251703
0.0573278	0.0512779	0.0504487	0.0513489	0.0517821	0.0535281	0.0553186	0.0568722	0.0581888	0.0590979	0.0604982	0.0619166	0.0633885	0.0645326	0.0649596	0.0663261	0.0668726	0.0679032	0.0686931	0.0698187	0.0705871	0.071529	0.072733	0.0736938	0.0748426	0.0755818	0.0765179	0.0773432	0.0779901	0.0789988	0.0801443	0.081333	0.0832459	0.085236	0.0878088	0.0927114	0.100832	0.109245	0.120442	0.134044	0.148291	0.163157	0.181073	0.200766	0.217432	0.232053	0.247396	0.257211	0.262774	0.272376
0.0481128	0.0429533	0.0396849	0.0397888	0.0405545	0.0412993	0.0430824	0.0440307	0.0453791	0.0463855	0.0482374	0.0484179	0.0493367	0.0504145	0.050942	0.0518621	0.0524231	0.0530498	0.0538054	0.0545409	0.0553235	0.0562654	0.0570033	0.0579402	0.0588163	0.0596358	0.0603313	0.0608357	0.0611654	0.0622993	0.0634817	0.0648708	0.0668109	0.0690383	0.071914	0.0768435	0.0845273	0.0924079	0.102417	0.114825	0.126414	0.138434	0.151828	0.16718	0.180102	0.190534	0.202038	0.209949	0.214834	0.222974
0.04864	0.0419986	0.038955	0.0367217	0.0369366	0.0372618	0.038163	0.0389214	0.0398322	0.0407367	0.040855	0.0415525	0.0422563	0.0426786	0.0430415	0.0440308	0.043871	0.0439679	0.0442152	0.0445076	0.0446277	0.0452972	0.04579	0.0460671	0.0471056	0.0475645	0.0480747	0.0485397	0.0492226	0.0500519	0.050925	0.0518161	0.0532798	0.0551527	0.0571796	0.0608581	0.0667484	0.0732081	0.0814664	0.0909779	0.100794	0.110919	0.123047	0.136787	0.147397	0.1572	0.166884	0.173167	0.177274	0.18382
0.0493225	0.0440069	0.0401354	0.0393741	0.0387608	0.038202	0.0389855	0.0391881	0.0401589	0.0398884	0.0401243	0.0409938	0.0415054	0.0418522	0.042085	0.0425439	0.0428521	0.0429191	0.0432319	0.0430926	0.0436401	0.0439382	0.0444045	0.0447793	0.0455032	0.0457265	0.0463766	0.0467274	0.0469593	0.0476382	0.0482728	0.0490784	0.050338	0.0519714	0.0537056	0.0574617	0.0632798	0.069487	0.0780369	0.0875466	0.0976729	0.108163	0.120575	0.134323	0.145366	0.155831	0.167082	0.17489	0.17934	0.186427
0.0524472	0.0451323	0.0441966	0.0435257	0.0429053	0.0441258	0.0450675	0.0454376	0.046207	0.0462132	0.0472705	0.0475918	0.0483203	0.0488573	0.0491916	0.049561	0.0500003	0.050025	0.0504859	0.0510294	0.0513212	0.0521171	0.0525368	0.053432	0.0537077	0.0542687	0.0546192	0.0548751	0.0553528	0.0559753	0.0565068	0.057471	0.0591433	0.0608603	0.0632682	0.0679725	0.0751221	0.08345	0.0939857	0.106745	0.119938	0.133315	0.148781	0.166206	0.180497	0.192521	0.205689	0.214921	0.220011	0.227295
0.0521202	0.0467477	0.0449782	0.0447558	0.0463184	0.0462912	0.0479693	0.0488346	0.049615	0.0505962	0.051356	0.0521356	0.0529068	0.0537228	0.0543331	0.0552019	0.0554925	0.0562719	0.0568199	0.0573905	0.058183	0.0587512	0.0595569	0.0605231	0.0613654	0.0620319	0.0627075	0.0630733	0.0638113	0.064556	0.0655471	0.0666935	0.0682744	0.0700426	0.0724794	0.0765943	0.0840462	0.0916657	0.101422	0.113664	0.126595	0.140154	0.156661	0.17524	0.191368	0.205492	0.220338	0.230675	0.236303	0.245548
0.0598701	0.0558635	0.0549956	0.0546255	0.0564716	0.0571158	0.058257	0.0585975	0.0601782	0.0599257	0.0604038	0.0616671	0.0625072	0.0628244	0.063215	0.0641711	0.0640512	0.0647825	0.0649796	0.065368	0.065937	0.0665319	0.0672725	0.0677233	0.0684798	0.0689156	0.069428	0.0699055	0.0702828	0.0708223	0.0716675	0.0724742	0.0737305	0.0753907	0.0775726	0.0819685	0.0893603	0.0971395	0.107667	0.120476	0.134151	0.148649	0.166002	0.185877	0.203122	0.218154	0.234517	0.245294	0.252093	0.262391
0.0517427	0.0481015	0.0436961	0.0441979	0.0454109	0.0461278	0.0472706	0.0478503	0.0493494	0.0503809	0.0521187	0.0524328	0.0533072	0.0542843	0.0548401	0.0556697	0.0561226	0.0569986	0.0574354	0.0581406	0.058783	0.0594797	0.0603429	0.0610322	0.0618648	0.0624805	0.0635005	0.0639524	0.0643474	0.0656011	0.0664137	0.0676372	0.0695257	0.071863	0.0746818	0.0795474	0.0879505	0.0966132	0.107909	0.122214	0.136572	0.151451	0.168228	0.187448	0.203064	0.216233	0.229709	0.238657	0.244329	0.25339
0.0468318	0.0390967	0.0360552	0.0331939	0.0322458	0.03303	0.0334941	0.0340051	0.0344866	0.0350996	0.0351316	0.0354783	0.0362318	0.0363893	0.0365745	0.0371436	0.0369546	0.0372581	0.037317	0.0372476	0.0374963	0.0380855	0.0386499	0.0387582	0.0396736	0.0401545	0.0404765	0.0411412	0.0416403	0.0423233	0.0433347	0.044448	0.0459202	0.0480003	0.0503704	0.0541286	0.0602865	0.0669614	0.075353	0.0846665	0.094071	0.103369	0.114384	0.126073	0.134905	0.142857	0.151223	0.156156	0.159599	0.165253
0.0552193	0.0492167	0.0461509	0.0442319	0.0433741	0.0439072	0.0440019	0.04393	0.0447405	0.0449434	0.0454293	0.0460738	0.0463656	0.0469294	0.0471599	0.0476497	0.0478642	0.0480105	0.048056	0.0482863	0.0487263	0.0492098	0.0495469	0.0499993	0.0507677	0.0511144	0.0519009	0.052389	0.0527589	0.0536021	0.054416	0.0554462	0.0570316	0.0586987	0.0607098	0.0647463	0.0710221	0.0779445	0.0870073	0.0977727	0.109093	0.121108	0.135725	0.15157	0.164621	0.17651	0.188929	0.196905	0.201628	0.208844
0.0514334	0.0431262	0.0421708	0.0408924	0.0396098	0.040295	0.0408146	0.0418815	0.0419887	0.0431911	0.0435343	0.0440706	0.0449185	0.0454376	0.0456175	0.046325	0.0466533	0.0470007	0.0473224	0.0479374	0.0483416	0.0491211	0.0496001	0.0506818	0.0512135	0.051812	0.052435	0.0529463	0.0536403	0.0544504	0.0551428	0.0562973	0.0581538	0.0600403	0.0623563	0.0668749	0.073549	0.0808935	0.0907835	0.102355	0.114745	0.12808	0.143709	0.161606	0.176539	0.189273	0.202822	0.212472	0.217844	0.225406
0.0642869	0.0593039	0.0576553	0.0575663	0.0590515	0.058754	0.0595132	0.0609058	0.0611253	0.0619339	0.0624629	0.0632692	0.0637538	0.0640964	0.064429	0.0651967	0.0651119	0.06545	0.0656714	0.0661459	0.0663401	0.0669037	0.0674283	0.068225	0.0687747	0.0693185	0.0698212	0.0699821	0.0704033	0.0712176	0.071942	0.0729833	0.0747048	0.0767301	0.0795303	0.0842712	0.0926215	0.101981	0.113615	0.12813	0.143523	0.159614	0.178393	0.199509	0.217374	0.232694	0.248906	0.260025	0.266227	0.275623
0.0677997	0.0639515	0.0635917	0.0649407	0.0677508	0.0695329	0.0707001	0.0731964	0.0754275	0.0756544	0.0775302	0.0793004	0.0807644	0.0817105	0.0824263	0.0838057	0.084294	0.0847023	0.0853269	0.0860543	0.0869024	0.0876743	0.0885795	0.089377	0.0905961	0.0913535	0.092288	0.0932596	0.0938137	0.0945548	0.0955821	0.0970133	0.0986326	0.100736	0.10345	0.108497	0.117725	0.127098	0.13944	0.154394	0.169641	0.185049	0.203727	0.223901	0.241028	0.255242	0.270627	0.280342	0.285371	0.294578
0.0648172	0.0619867	0.0568475	0.0571782	0.058281	0.0596007	0.0603903	0.0619177	0.0625442	0.0640608	0.0657812	0.0664108	0.0666193	0.0681688	0.0685439	0.069175	0.0697699	0.0697759	0.0704009	0.0708792	0.0708642	0.0716952	0.0725836	0.0736139	0.07454	0.0752678	0.0762392	0.0767109	0.077314	0.0783866	0.079394	0.0810011	0.0831546	0.0854832	0.0889402	0.0949407	0.104507	0.114515	0.127489	0.143505	0.159053	0.174743	0.19213	0.211757	0.227961	0.24114	0.254942	0.263786	0.268692	0.277246
0.0573368	0.0491542	0.0450107	0.0411414	0.0412071	0.0407191	0.0415317	0.041946	0.0423272	0.0430692	0.0430289	0.0437451	0.0438035	0.0439079	0.0441921	0.0443117	0.0439188	0.0439758	0.043496	0.0432857	0.0433782	0.04354	0.043807	0.0435966	0.0443662	0.0445811	0.0449845	0.0453938	0.045857	0.0464725	0.0469221	0.0475337	0.0486058	0.0501087	0.0515767	0.0546738	0.0595661	0.0650262	0.0721034	0.0805086	0.0889279	0.0976465	0.10815	0.119715	0.128687	0.13691	0.145343	0.150583	0.154129	0.159729
0.0525813	0.0451108	0.0413209	0.0393087	0.0389331	0.0387787	0.0391536	0.0391079	0.0405947	0.0412703	0.0414131	0.0418841	0.0425944	0.0428912	0.0431346	0.043768	0.0437342	0.0437728	0.0437757	0.0439061	0.0443374	0.0445665	0.0450102	0.045535	0.0461584	0.0464628	0.0472864	0.047705	0.0482333	0.0491024	0.0499168	0.0511031	0.0527606	0.0547306	0.0570716	0.0614952	0.0678859	0.075263	0.0846687	0.0955419	0.106365	0.117853	0.1311	0.145795	0.15701	0.167405	0.178147	0.185306	0.188782	0.195107
0.0628416	0.0543973	0.0545065	0.0529558	0.0518465	0.0528911	0.0541545	0.0553195	0.0565285	0.0573679	0.0581816	0.0592202	0.0598112	0.060573	0.0612226	0.0615073	0.0621483	0.0621197	0.0625195	0.0627847	0.062996	0.0636449	0.0641431	0.0649385	0.0656585	0.0661395	0.0667522	0.0672092	0.0678341	0.0687792	0.0695767	0.0705767	0.0724604	0.0741866	0.0761378	0.080747	0.0874954	0.0950363	0.10504	0.116839	0.128869	0.141189	0.155915	0.172756	0.186662	0.198285	0.210999	0.219914	0.224772	0.231399
0.0663004	0.0601495	0.0595083	0.0585284	0.0601277	0.0602831	0.0618013	0.0635831	0.0643558	0.0656821	0.0665611	0.0677033	0.0680979	0.0687812	0.0693558	0.069963	0.0702289	0.0705423	0.0707591	0.0712182	0.0713885	0.0719896	0.0725883	0.0734712	0.0742298	0.0747588	0.0753385	0.0755771	0.0762106	0.0772042	0.0781755	0.0794457	0.0811286	0.0830984	0.0857729	0.09072	0.0990001	0.107824	0.11887	0.132455	0.146374	0.160815	0.177801	0.197202	0.212968	0.22677	0.241493	0.251239	0.256051	0.264212
0.0614913	0.0553875	0.0536994	0.0529879	0.0544622	0.0549084	0.0558909	0.0572717	0.0584587	0.0589691	0.05988	0.0612976	0.0617912	0.0618306	0.0620134	0.062855	0.0628888	0.0629702	0.0631222	0.0632335	0.0633417	0.0637519	0.0644264	0.0648415	0.0654802	0.0660726	0.0667371	0.0669191	0.0672056	0.0679569	0.068597	0.0694494	0.0707481	0.0722893	0.0744686	0.0788283	0.0860822	0.0942524	0.10482	0.118066	0.131948	0.146493	0.164103	0.183399	0.200251	0.214954	0.230654	0.240758	0.246436	0.255618
0.0509083	0.0450472	0.0410483	0.0398588	0.0410633	0.0415167	0.0420818	0.0426632	0.0437006	0.0443879	0.0459551	0.0464095	0.0469288	0.0478658	0.0483724	0.0488218	0.0494603	0.0492462	0.0493837	0.0495825	0.049656	0.0501887	0.0507983	0.0513778	0.0521352	0.0526416	0.0532586	0.0536916	0.0540135	0.0547218	0.055605	0.0563645	0.0575266	0.0588065	0.060997	0.0649417	0.0712952	0.0783544	0.0875746	0.0988274	0.110314	0.122134	0.135757	0.150904	0.163597	0.174475	0.185303	0.192568	0.196568	0.203347
0.0387092	0.0307372	0.02761	0.0244824	0.0232626	0.0225703	0.0226132	0.022808	0.0224862	0.022578	0.0222772	0.0221437	0.022193	0.0220928	0.0218548	0.0220767	0.0215852	0.0216771	0.0216305	0.0211761	0.0213234	0.021487	0.021891	0.0219419	0.0224009	0.0226941	0.0229222	0.0234227	0.0237115	0.0241106	0.0246442	0.0250817	0.02589	0.0269936	0.0281458	0.0302475	0.0335835	0.0374415	0.0424095	0.0481657	0.0543748	0.0606739	0.0681063	0.0760304	0.0825004	0.0885047	0.0948242	0.0990434	0.102116	0.106515
0.0588808	0.0510356	0.0474801	0.0448328	0.0443562	0.0444834	0.0445276	0.0448186	0.0461527	0.0469186	0.0473182	0.0477631	0.0480392	0.0483286	0.048341	0.0486966	0.0483489	0.0483514	0.0481982	0.0482855	0.0482544	0.0484245	0.0486705	0.049178	0.0496004	0.050191	0.0510129	0.0514238	0.0518101	0.0526583	0.053387	0.0545472	0.0559235	0.0572257	0.0588617	0.0623708	0.067615	0.073104	0.0805452	0.0890821	0.0978119	0.107326	0.118485	0.130753	0.140385	0.149174	0.15888	0.164698	0.167851	0.173286
0.0550515	0.0466212	0.0447723	0.0423162	0.0402595	0.040772	0.0410462	0.0421084	0.0419564	0.0420046	0.0428552	0.0429992	0.0430586	0.0432225	0.0434816	0.0434118	0.0432277	0.0430406	0.0431061	0.0429766	0.0429771	0.0431483	0.0432843	0.0436794	0.0438103	0.0441561	0.04454	0.044739	0.0450885	0.0457177	0.0461889	0.0470093	0.0482261	0.0492135	0.0507453	0.053719	0.0585762	0.064005	0.0711254	0.0800199	0.0894786	0.099606	0.111965	0.125928	0.13788	0.14789	0.158729	0.166537	0.171015	0.176955
0.0493404	0.041565	0.039127	0.036884	0.0370042	0.0360504	0.0370511	0.0383058	0.038631	0.0395545	0.040079	0.0404836	0.0411509	0.0412269	0.0413534	0.0418903	0.0417011	0.0421635	0.042043	0.0420824	0.0423633	0.0428198	0.0431416	0.0436456	0.044065	0.0445262	0.0450528	0.0451348	0.0456386	0.0462718	0.0469992	0.0477543	0.0488179	0.0501593	0.0519409	0.0548262	0.0602243	0.0660973	0.0734692	0.082574	0.0923263	0.102479	0.114613	0.128501	0.14018	0.15041	0.161169	0.168724	0.172894	0.179373
0.0681085	0.0615104	0.0606211	0.0587684	0.0605064	0.0620028	0.0627324	0.0646659	0.0668578	0.0674611	0.0684613	0.0698961	0.0708793	0.0711664	0.071318	0.0722188	0.0720389	0.071912	0.0719369	0.0719447	0.0721739	0.0725644	0.0730894	0.073742	0.0743865	0.0752135	0.0757408	0.0764723	0.0767605	0.0775411	0.078219	0.0792909	0.0806903	0.0821968	0.0841136	0.088458	0.0958606	0.103258	0.112784	0.124446	0.136121	0.148116	0.1626	0.179118	0.192638	0.203788	0.215843	0.223186	0.22656	0.23363
0.0459684	0.0407631	0.0353646	0.0335412	0.0334573	0.0334955	0.0332489	0.0343543	0.0344067	0.0351915	0.0362601	0.0365264	0.0364293	0.0376068	0.0373824	0.0377252	0.037797	0.037746	0.0376196	0.0376049	0.0376622	0.037975	0.0384465	0.0390844	0.0393079	0.0400266	0.0406517	0.0412	0.0411963	0.0419078	0.0426565	0.0433467	0.0445174	0.0459389	0.0481913	0.0517613	0.0577015	0.0640617	0.0723422	0.0827332	0.0932494	0.104234	0.116862	0.130871	0.142222	0.151349	0.16056	0.166606	0.169342	0.174962
[truncated: 126 more columns]
