# Supplementary material for: Recognition of maize seed varieties based on hyperspectral imaging technology and integrated learning algorithms
Source: PeerJ Comput Sci. 2023 May 10;9:e1354. doi: 10.7717/peerj-cs.1354 (PMC10280578; doi:10.7717/peerj-cs.1354)
Supplement: Supplemental Information 4 — Each row represents the hyperspectral data information of a seed. There are 60 rows representing the data information of 60 seeds. Each column represents the band information of each seed, and there are 176 columns in the table, representing 176 bands. [file peerj-cs-09-1354-s004.xls]

## Sheet: Sheet1
0.0376284	0.0302648	0.0272709	0.0259431	0.0247166	0.0239452	0.0239603	0.0235882	0.0240939	0.0240747	0.0244272	0.0246067	0.0246073	0.0248356	0.0250037	0.0253904	0.0253176	0.0253327	0.0254525	0.0257826	0.0259884	0.0263678	0.0265758	0.0271056	0.0275588	0.0279009	0.0285401	0.0288558	0.0293794	0.0300801	0.0306521	0.031363	0.0325413	0.0338802	0.0354733	0.0383085	0.042573	0.0473493	0.0533454	0.0599995	0.0662392	0.0728581	0.0803224	0.0884474	0.094358	0.100134	0.106177	0.110011	0.112894	0.11723
0.0462455	0.0399578	0.035479	0.0344292	0.0327689	0.0331796	0.0337715	0.0337802	0.0343588	0.0355109	0.0360911	0.036554	0.0371904	0.0376486	0.0378418	0.0383395	0.0385141	0.0390021	0.0391724	0.0394464	0.0401225	0.0406562	0.0413376	0.0421026	0.0427083	0.0433052	0.0440241	0.0448829	0.0455108	0.046216	0.0471969	0.0482392	0.0497544	0.0512693	0.0531429	0.0567997	0.062207	0.0679934	0.0753512	0.0835254	0.0914854	0.0992045	0.10865	0.118843	0.126487	0.133585	0.141558	0.146766	0.149737	0.154879
0.0461762	0.0387867	0.0356895	0.0341273	0.0329785	0.0333549	0.0334106	0.0339201	0.0344589	0.0350063	0.0354419	0.0360412	0.0366919	0.037438	0.0370446	0.0376529	0.0379847	0.0380758	0.0385553	0.03917	0.0396215	0.0403045	0.0409392	0.0418569	0.0424893	0.0433235	0.0440104	0.0445162	0.0453868	0.046444	0.0473462	0.0486595	0.0505274	0.0525602	0.0552922	0.0599258	0.0666005	0.0741876	0.0837218	0.0945235	0.104868	0.115513	0.127628	0.141274	0.152623	0.16213	0.172928	0.180497	0.184982	0.191022
0.0509875	0.0438639	0.0413096	0.0384136	0.0381075	0.0383194	0.0384813	0.0391211	0.0403965	0.0405614	0.0411919	0.0421645	0.0423591	0.0423013	0.0431073	0.0433279	0.0437247	0.0441874	0.0447144	0.0450876	0.0458447	0.0464088	0.0469548	0.0476243	0.0482858	0.0489676	0.049767	0.0501885	0.0509499	0.0522135	0.0531086	0.0542212	0.0558169	0.0575143	0.0597153	0.0636983	0.0702734	0.0775598	0.0866201	0.0976688	0.109023	0.120231	0.133213	0.148094	0.161135	0.171527	0.183417	0.191495	0.196199	0.203364
0.0473985	0.0388404	0.0358437	0.0347269	0.0352322	0.0353353	0.0359522	0.0367079	0.0376354	0.038531	0.0399047	0.0409429	0.0413396	0.0422572	0.0427322	0.0434622	0.0440335	0.0448	0.0451635	0.045917	0.0469084	0.0476479	0.048697	0.049705	0.050596	0.0514324	0.0522055	0.0529589	0.0540115	0.0551283	0.0565105	0.0580864	0.0602366	0.0628001	0.0660948	0.0715557	0.0800836	0.0889023	0.0998962	0.112445	0.124565	0.136531	0.149993	0.165066	0.177351	0.188079	0.199718	0.207261	0.211491	0.218832
0.0440101	0.0387565	0.0360632	0.0339325	0.0354652	0.0355924	0.0352914	0.0374709	0.0380033	0.0394359	0.0400988	0.0415474	0.0420205	0.0428391	0.0434656	0.0443124	0.0450475	0.04583	0.0464838	0.0471615	0.0478732	0.0488926	0.0499078	0.0509199	0.0515687	0.0526375	0.05337	0.0544213	0.0552692	0.0564337	0.057645	0.0589387	0.060516	0.0621971	0.064412	0.0684636	0.0751051	0.0821318	0.0910576	0.101989	0.112657	0.123523	0.136064	0.15023	0.161839	0.172304	0.182932	0.189959	0.193852	0.201247
0.0391969	0.0318743	0.0295825	0.0271778	0.025922	0.0257883	0.025951	0.0259735	0.02656	0.0266355	0.0272058	0.0269904	0.0271689	0.0277591	0.0279655	0.028035	0.0284868	0.0285862	0.0288041	0.0288673	0.0293459	0.0299988	0.0301607	0.0305572	0.0312354	0.0314836	0.0322135	0.0325566	0.0329782	0.0338022	0.0342596	0.0349275	0.0361202	0.0371344	0.0386495	0.0413166	0.0454763	0.0499872	0.0557101	0.0618298	0.0677385	0.0735618	0.0806394	0.0879782	0.0936498	0.0989325	0.104632	0.108105	0.11081	0.114946
0.045014	0.0383591	0.0352083	0.032939	0.0322334	0.0321903	0.0323159	0.0328168	0.0332228	0.0338014	0.0341212	0.0347304	0.0354572	0.0353282	0.0356616	0.0361478	0.0367316	0.036721	0.0371185	0.0377212	0.0382577	0.0385658	0.0393328	0.0400101	0.0406741	0.0413617	0.0420986	0.0427432	0.0433997	0.0440907	0.0450471	0.0462971	0.0480124	0.0498743	0.0521921	0.0565337	0.0626252	0.069336	0.0777954	0.0871069	0.0961566	0.105406	0.116096	0.127801	0.136835	0.145194	0.154625	0.160771	0.164564	0.170533
0.0506031	0.0432565	0.0410706	0.0408319	0.0397299	0.0411822	0.0416225	0.0431045	0.0436124	0.044684	0.0461064	0.0465751	0.0475379	0.0487263	0.0487865	0.04985	0.0503203	0.0507408	0.0515507	0.0522804	0.0531164	0.0540951	0.0547401	0.055912	0.0567543	0.0575582	0.0585251	0.0592028	0.0600965	0.0612336	0.0621219	0.0634085	0.065255	0.0668748	0.0689899	0.0732584	0.0792624	0.0860113	0.0949089	0.104932	0.114319	0.123634	0.134818	0.147628	0.157968	0.166632	0.176888	0.183873	0.187893	0.193804
0.0519624	0.0444207	0.0442145	0.0420026	0.0424128	0.043819	0.0449142	0.0466082	0.0480137	0.0494387	0.0511216	0.0525724	0.0537784	0.0546364	0.0557844	0.0565749	0.057488	0.0588072	0.0596312	0.0608599	0.0620727	0.0630181	0.0643913	0.0654095	0.0665372	0.0675203	0.0686137	0.0694688	0.0704283	0.0721703	0.0733395	0.0750173	0.077315	0.0795337	0.0825523	0.0875415	0.0958243	0.104468	0.114886	0.127069	0.139056	0.150546	0.163716	0.178909	0.191666	0.202038	0.213522	0.221647	0.225955	0.233231
0.0500212	0.0439388	0.0407555	0.0407415	0.0416116	0.042056	0.0426631	0.0443813	0.0452939	0.0467709	0.0483632	0.0493859	0.0503511	0.0513007	0.0521929	0.0526029	0.0537134	0.0548422	0.055389	0.0565125	0.0577268	0.0587717	0.0602649	0.0612847	0.0622518	0.0633454	0.0645754	0.0655157	0.0666411	0.0681155	0.0697515	0.0716918	0.0737386	0.0762124	0.0794299	0.0844962	0.0926976	0.101154	0.111824	0.124016	0.135775	0.147613	0.160746	0.176339	0.188639	0.1991	0.210991	0.218704	0.223089	0.23061
0.0576921	0.0551868	0.05197	0.051957	0.0532194	0.0553746	0.0555669	0.0576094	0.0593705	0.0605981	0.0625791	0.0638131	0.0646834	0.0652649	0.0663263	0.0673131	0.0682299	0.0692664	0.0699866	0.0710945	0.0719539	0.0731338	0.0746224	0.075438	0.076398	0.0777481	0.0786988	0.0796577	0.080579	0.0820217	0.083492	0.0853594	0.0875581	0.0897521	0.0927593	0.0982871	0.107303	0.11633	0.127997	0.142027	0.155293	0.168339	0.183759	0.200554	0.214393	0.226197	0.239131	0.24679	0.251021	0.259363
0.0416928	0.0319977	0.0304796	0.0285167	0.0276999	0.0274714	0.0277004	0.0275806	0.0281255	0.0284167	0.028908	0.0292044	0.0296372	0.0298754	0.0302473	0.0303394	0.0307406	0.0309275	0.0312521	0.0314974	0.0319114	0.0324045	0.0330213	0.0333361	0.0341609	0.0344926	0.0351475	0.035798	0.036184	0.0371528	0.0377424	0.0385706	0.0399211	0.0413306	0.0433141	0.0467288	0.0519306	0.057724	0.0649984	0.0734061	0.0814104	0.0895466	0.0991522	0.109083	0.116819	0.124288	0.132158	0.137131	0.140646	0.146379
0.0456992	0.0377143	0.0342932	0.0324457	0.0312425	0.0311044	0.0306907	0.0310109	0.0314982	0.0323158	0.031906	0.0331171	0.0333736	0.033499	0.0338035	0.0347172	0.0348419	0.0353169	0.0355714	0.0361844	0.0367591	0.0373061	0.0379979	0.0389563	0.039717	0.0404239	0.0412996	0.0420488	0.0426324	0.0437023	0.0447658	0.0461809	0.0481879	0.0505571	0.0532836	0.0583585	0.0652098	0.0728405	0.0823942	0.0927036	0.102886	0.113037	0.124716	0.137108	0.146743	0.155572	0.165356	0.172159	0.17613	0.182769
0.0493401	0.0425713	0.0402411	0.0389624	0.0381685	0.0392253	0.0394675	0.0401199	0.0406807	0.0414902	0.0424888	0.0431675	0.0438212	0.0449486	0.0451226	0.0460391	0.0465411	0.0469601	0.0479635	0.0485645	0.0496596	0.0506305	0.0513337	0.0524843	0.053505	0.0543029	0.0552888	0.0560609	0.0568106	0.0580037	0.0589445	0.0603998	0.0623908	0.0641606	0.0664821	0.0708795	0.0774368	0.0844369	0.093501	0.103446	0.113011	0.122471	0.13354	0.146133	0.155976	0.164514	0.174254	0.181026	0.185093	0.191094
0.0522866	0.0447226	0.0428894	0.0412498	0.0413626	0.0421012	0.042552	0.0434328	0.044563	0.0451914	0.0466709	0.0474438	0.0480693	0.0487928	0.0496903	0.0506634	0.0511128	0.052155	0.0529764	0.0539491	0.0551122	0.0560669	0.0569544	0.0579858	0.0591126	0.0601119	0.0612717	0.0620092	0.0631306	0.0645678	0.0656828	0.0674145	0.0699639	0.072542	0.0759127	0.0816095	0.0903846	0.0996797	0.111215	0.124593	0.137589	0.150581	0.164931	0.181508	0.194894	0.206403	0.219232	0.228185	0.233327	0.241306
0.0485492	0.0407589	0.0380401	0.0358637	0.0358315	0.0362561	0.0372165	0.0370571	0.0379913	0.0384455	0.0395405	0.0399715	0.040808	0.0414207	0.042148	0.0426864	0.0434441	0.0444637	0.0447972	0.0457544	0.0465197	0.0476215	0.0484649	0.049518	0.050178	0.0512088	0.0521303	0.0530269	0.0539145	0.0549716	0.0563295	0.0580039	0.0602105	0.0630317	0.0663143	0.0717388	0.080268	0.0895071	0.101019	0.114271	0.127613	0.140764	0.155542	0.172333	0.185994	0.197933	0.210655	0.21928	0.224458	0.232863
0.0456573	0.0410266	0.0378383	0.0354258	0.0360958	0.0363612	0.0360454	0.0369903	0.0379983	0.038577	0.0389401	0.0402008	0.0403807	0.0412958	0.0416334	0.0422293	0.0428777	0.043466	0.043808	0.044873	0.0455434	0.046387	0.0471519	0.0479194	0.0486764	0.0495556	0.0502407	0.0510041	0.0517009	0.0526986	0.0537304	0.0549711	0.056662	0.0586242	0.0611022	0.0655729	0.0728769	0.0807525	0.0911485	0.104104	0.117313	0.131105	0.146987	0.164211	0.179361	0.192799	0.206678	0.215991	0.222134	0.231599
0.0405362	0.0325457	0.0305184	0.0282977	0.0270999	0.0276585	0.0271854	0.027155	0.0274848	0.0276701	0.0281421	0.0281975	0.028504	0.029097	0.0293718	0.0297516	0.0298811	0.0301327	0.030645	0.0310113	0.0313151	0.0319355	0.0323212	0.0325919	0.0334846	0.0337605	0.034451	0.0348334	0.035266	0.0362108	0.0366149	0.0373431	0.0385933	0.0399435	0.0416325	0.0448329	0.0495686	0.0550077	0.0617064	0.0696032	0.0769892	0.0846674	0.0939409	0.103723	0.111241	0.118714	0.126478	0.131455	0.13505	0.140234
0.0464747	0.0396789	0.0371341	0.0353689	0.0346093	0.0346614	0.0347544	0.0345235	0.0355684	0.036046	0.0359454	0.0367681	0.0370034	0.0375048	0.0377676	0.0381813	0.038502	0.0388156	0.0392052	0.0396691	0.0401453	0.0404985	0.0411957	0.0418136	0.0425071	0.0430739	0.0437778	0.0442283	0.0445727	0.045407	0.0460886	0.0471119	0.0486333	0.0503746	0.0525462	0.0568204	0.0629486	0.0700301	0.0790869	0.0891552	0.0991617	0.109181	0.120685	0.133262	0.142992	0.152083	0.162125	0.168593	0.173146	0.179448
0.0475476	0.0394779	0.0376495	0.037287	0.0356538	0.0369089	0.0374469	0.0383888	0.0394462	0.0399566	0.0405865	0.0415943	0.0425789	0.0438498	0.0442038	0.0450612	0.0457753	0.0465912	0.0475637	0.0481487	0.0492754	0.0503868	0.05118	0.0523978	0.0534032	0.0543555	0.055316	0.0561169	0.0569865	0.0581395	0.0590732	0.060429	0.0624482	0.0643886	0.0667169	0.0711958	0.0779599	0.0851336	0.0944959	0.105514	0.115961	0.126594	0.139166	0.153197	0.164619	0.174542	0.185947	0.194137	0.199315	0.206132
0.0493226	0.0416388	0.0401571	0.0379867	0.0373198	0.0383391	0.0387464	0.0389148	0.0397139	0.0399761	0.0409065	0.0414116	0.042189	0.0425765	0.0430767	0.0438099	0.044259	0.0450062	0.045609	0.0466394	0.0475653	0.0483008	0.049229	0.0502413	0.051386	0.0520374	0.0530496	0.0536027	0.0543517	0.0557254	0.0569811	0.0585494	0.0611223	0.0637774	0.0676015	0.0731426	0.0819248	0.0914063	0.102878	0.116102	0.129077	0.141964	0.156222	0.172092	0.185558	0.196336	0.208641	0.21702	0.221974	0.229657
0.0425831	0.0341489	0.0307383	0.029556	0.0293579	0.0290296	0.029658	0.0295617	0.0300693	0.0300805	0.0309356	0.0314838	0.0320679	0.0321013	0.0325888	0.0330086	0.0335131	0.0342827	0.0345965	0.0352485	0.0360437	0.0367275	0.0374256	0.0383706	0.0389977	0.0397335	0.0402443	0.0408826	0.0414376	0.0422339	0.0429983	0.0442757	0.0459258	0.0480463	0.0506527	0.0552829	0.0623216	0.070025	0.0797614	0.0909385	0.102327	0.113575	0.126495	0.140505	0.152265	0.162525	0.173459	0.181279	0.185994	0.193632
0.0459583	0.0405777	0.037234	0.0362873	0.0364228	0.0370799	0.0370712	0.0382734	0.0393272	0.0397986	0.0401108	0.0412535	0.0417821	0.0423256	0.0428616	0.0438041	0.04414	0.0451326	0.0455496	0.0465487	0.0473128	0.048124	0.0492026	0.0498945	0.0506411	0.0516881	0.0524319	0.0530602	0.0536826	0.0545446	0.0555548	0.0569749	0.058716	0.0606214	0.0633045	0.0678799	0.0751878	0.0830579	0.0932895	0.105596	0.118091	0.130964	0.145691	0.161545	0.175145	0.187053	0.199483	0.20769	0.21291	0.221587
0.0359866	0.0283946	0.0244054	0.0224892	0.0209427	0.0201483	0.0193179	0.0188643	0.0187906	0.0180131	0.0183032	0.0179576	0.0175746	0.017636	0.0176454	0.0173889	0.0174974	0.017458	0.0176816	0.0177611	0.017823	0.0181217	0.0184275	0.0185641	0.0190406	0.0191301	0.0195541	0.0198108	0.0200246	0.020488	0.0208314	0.0213367	0.0221815	0.02306	0.0243291	0.0266624	0.030166	0.0344584	0.0401351	0.0467739	0.0538028	0.0611611	0.0698756	0.0792854	0.0869432	0.0943317	0.102074	0.107182	0.111281	0.116641
0.0428269	0.03621	0.0312486	0.0298535	0.0289394	0.0286878	0.028961	0.0282836	0.0285488	0.0291971	0.0288289	0.0291899	0.0296417	0.0294129	0.0297928	0.0302088	0.0303804	0.0305919	0.0309396	0.0314955	0.0318284	0.0322401	0.0329146	0.033464	0.0340686	0.0346448	0.0352567	0.0357063	0.0360913	0.0369216	0.0375464	0.0384377	0.039947	0.041498	0.0435279	0.0472258	0.0526911	0.0589865	0.0670872	0.0759849	0.0846879	0.0937365	0.10423	0.115564	0.124277	0.132637	0.141869	0.148012	0.152283	0.158182
0.0449709	0.0370653	0.0337545	0.032561	0.0311382	0.0313834	0.0312636	0.0313622	0.0314511	0.0315979	0.0321431	0.0320721	0.0324809	0.0331427	0.0330928	0.0337459	0.0338885	0.0341165	0.0348101	0.0352559	0.0356645	0.0366123	0.0371636	0.0381699	0.0389	0.0395741	0.0403482	0.0408386	0.041445	0.042358	0.0433422	0.0449731	0.0471008	0.0493524	0.0523912	0.0575732	0.0647023	0.0730619	0.0832333	0.0952001	0.10677	0.118529	0.131968	0.14675	0.159204	0.169569	0.181416	0.190206	0.195709	0.202876
0.0473247	0.0406536	0.0373492	0.0355333	0.0349205	0.0355213	0.0355075	0.0361228	0.0366438	0.0368878	0.0377566	0.0381205	0.0389165	0.0390547	0.0394504	0.0403556	0.0405663	0.0415248	0.0421089	0.042843	0.0436537	0.0444534	0.045146	0.0460193	0.0468749	0.0475276	0.0482868	0.0488751	0.0495178	0.0505997	0.0515206	0.052909	0.0546897	0.0569281	0.059871	0.0648265	0.0727994	0.081866	0.0929165	0.105762	0.119046	0.132151	0.146446	0.162773	0.176305	0.187765	0.200374	0.209279	0.214868	0.222939
0.0461009	0.038318	0.0351757	0.0345371	0.0350328	0.0347759	0.0351376	0.0355063	0.0361908	0.0364666	0.0375953	0.0381238	0.0388818	0.0396224	0.0397259	0.0404675	0.0411261	0.0417858	0.042631	0.0434821	0.0442717	0.0449219	0.045977	0.0467698	0.0476843	0.0485173	0.0492693	0.0499007	0.0507955	0.0515309	0.052642	0.0538445	0.055382	0.0575078	0.0600308	0.0642223	0.0710882	0.0784156	0.0877449	0.0988391	0.110236	0.12163	0.135097	0.149928	0.162621	0.1734	0.185327	0.193843	0.198826	0.207019
0.0463156	0.0406755	0.038891	0.0373169	0.0373951	0.0379318	0.0374813	0.0383264	0.0392676	0.0396397	0.0399551	0.0411955	0.0415896	0.0420528	0.0429473	0.0435458	0.0439678	0.0447337	0.0452617	0.0461881	0.0469723	0.0477831	0.0488475	0.0497405	0.0507404	0.0516952	0.0522532	0.0530414	0.0536846	0.0548271	0.0560081	0.0578488	0.0602954	0.0631501	0.0670268	0.073172	0.0821037	0.0920262	0.104469	0.119254	0.133631	0.14797	0.164829	0.182516	0.197289	0.210425	0.224037	0.233122	0.238685	0.24832
0.0423189	0.0354072	0.0328929	0.0305577	0.0297565	0.0295203	0.0299191	0.0300028	0.0301753	0.0308243	0.031024	0.031194	0.0313648	0.0319513	0.0323643	0.0326593	0.0328297	0.033155	0.0334118	0.0336204	0.0339334	0.0346651	0.0350604	0.0354887	0.0362092	0.0364633	0.0371476	0.0376216	0.0380159	0.0389204	0.0395154	0.0403292	0.041543	0.0431027	0.0450706	0.0484666	0.0537184	0.0595802	0.0668825	0.0753495	0.083541	0.0918022	0.101569	0.112261	0.120425	0.128337	0.136665	0.141797	0.145764	0.151505
0.0446371	0.0375488	0.0334972	0.0308823	0.0310254	0.0305224	0.0304555	0.0296329	0.0300915	0.0306118	0.030295	0.030954	0.0311173	0.0309443	0.0316197	0.0321463	0.0324617	0.0326301	0.0328824	0.0332685	0.0336182	0.0341551	0.0347412	0.0352365	0.0358148	0.0362533	0.0368877	0.0374362	0.0375902	0.0385088	0.0391779	0.0401799	0.0417688	0.0434716	0.0456361	0.0496485	0.0555803	0.0621265	0.0703662	0.0796944	0.0886976	0.0977172	0.108304	0.119604	0.128709	0.136779	0.145831	0.151823	0.155766	0.161412
0.0438284	0.036953	0.0334534	0.0323582	0.0310035	0.0311717	0.0314237	0.0314314	0.0314836	0.0319613	0.0319972	0.0325043	0.03303	0.033678	0.0337315	0.0343762	0.0345767	0.0349363	0.0355584	0.0358816	0.0364655	0.0371951	0.0375846	0.0383588	0.0390839	0.0395542	0.0401093	0.040601	0.0410927	0.041935	0.0425469	0.0436254	0.0450875	0.0465445	0.048551	0.0524691	0.0580777	0.0646885	0.0734503	0.0837201	0.0943787	0.10554	0.118635	0.133454	0.145851	0.156674	0.1685	0.177477	0.182893	0.190092
0.0476621	0.0410779	0.0383926	0.0369702	0.0365506	0.0370574	0.0369548	0.0375775	0.0384662	0.0385372	0.0392913	0.0397667	0.0406067	0.0408639	0.0415403	0.0423306	0.0425289	0.0435327	0.0439299	0.0447156	0.0456892	0.0465158	0.0471361	0.0482212	0.0490887	0.0496961	0.0506179	0.0511442	0.0517978	0.0528047	0.053909	0.0553751	0.0571566	0.0593608	0.0623806	0.0672866	0.0750593	0.0838467	0.094487	0.106825	0.119655	0.132089	0.146229	0.162427	0.176038	0.187533	0.20039	0.209255	0.214923	0.222726
0.0472483	0.0391343	0.0363942	0.0354674	0.0362234	0.0362254	0.0362305	0.0367545	0.0373617	0.0371863	0.0386903	0.0389792	0.0395622	0.0402188	0.0407312	0.0414564	0.042122	0.0429576	0.0434302	0.0444521	0.0450355	0.0458062	0.0469407	0.0476067	0.0483477	0.049039	0.0498755	0.0505684	0.0513072	0.0521002	0.0532509	0.054462	0.055982	0.0579945	0.0606968	0.0653333	0.0724238	0.0803388	0.0901939	0.101952	0.113885	0.125858	0.139934	0.155742	0.168822	0.180343	0.1927	0.201045	0.206542	0.214729
0.0460584	0.0396161	0.0371189	0.0348581	0.0358589	0.0357717	0.0359652	0.0370378	0.0373996	0.0384679	0.039007	0.040221	0.0407669	0.0415098	0.042109	0.0428855	0.0432925	0.0441106	0.044482	0.0454983	0.0462356	0.0471517	0.0478324	0.0484367	0.0491393	0.049953	0.0505998	0.0513028	0.051857	0.0525566	0.0533381	0.0543893	0.0557197	0.0570484	0.059054	0.0627221	0.0685989	0.0751278	0.0834887	0.0939865	0.104635	0.11558	0.128664	0.143124	0.155544	0.166545	0.178443	0.186132	0.19121	0.199548
0.0406341	0.0320218	0.0293363	0.0266441	0.0258654	0.0259425	0.0260018	0.0256184	0.0263059	0.0260149	0.0263148	0.0265197	0.0268128	0.0267884	0.0270922	0.0272039	0.0275311	0.0275698	0.0278777	0.027943	0.0284248	0.0287684	0.0291493	0.0294704	0.0301386	0.0303962	0.0310195	0.0313244	0.0317879	0.0325016	0.0331428	0.0341493	0.0354091	0.0370628	0.0391513	0.0427109	0.0480624	0.0540458	0.061293	0.0697567	0.0775795	0.0855775	0.0946287	0.104379	0.111878	0.118856	0.126436	0.130823	0.134135	0.139347
0.0465519	0.0405463	0.0363015	0.0345677	0.0335207	0.0338716	0.0336554	0.0334855	0.0341352	0.0347504	0.0345065	0.0350134	0.0352362	0.0355555	0.0359786	0.036433	0.0365307	0.0369411	0.0371461	0.0375267	0.037965	0.0384365	0.0391953	0.0396492	0.0404777	0.0409657	0.0416216	0.042106	0.0425585	0.0435205	0.0444131	0.0456844	0.0475545	0.0495561	0.0522622	0.0570071	0.0638308	0.0715512	0.0812344	0.0921176	0.102729	0.113434	0.126036	0.139288	0.149695	0.159284	0.169802	0.176521	0.180727	0.187268
0.0469539	0.0388093	0.0365355	0.0356342	0.0354709	0.0355531	0.0360541	0.036613	0.0371542	0.0378259	0.0385969	0.0387694	0.0395446	0.040669	0.0407433	0.0415316	0.0418674	0.0421969	0.0428805	0.0433238	0.0442296	0.0450885	0.0457456	0.0467225	0.0475636	0.0482171	0.0490287	0.0495144	0.0501773	0.0513184	0.0522648	0.0538303	0.0561432	0.058355	0.0611441	0.0659437	0.0727319	0.0800108	0.0891495	0.0991269	0.108591	0.117864	0.12911	0.14135	0.151347	0.159774	0.169127	0.175945	0.179879	0.185284
0.0457029	0.0385142	0.0360779	0.034376	0.0339231	0.0330026	0.0335357	0.0336357	0.033802	0.0342927	0.0352305	0.0354149	0.0359357	0.0359342	0.0366285	0.0371756	0.0368965	0.0377503	0.038214	0.0386971	0.0392439	0.0397006	0.0404903	0.0411537	0.0417017	0.042041	0.042735	0.0430078	0.0436556	0.0443151	0.0450326	0.0461704	0.0476234	0.0491632	0.0513731	0.0552136	0.061367	0.0683393	0.0768148	0.0871129	0.097774	0.108504	0.12092	0.134935	0.146745	0.156698	0.167589	0.175234	0.179882	0.186706
0.0447616	0.0367237	0.0333684	0.0320123	0.031302	0.0310361	0.0307555	0.0306703	0.0313711	0.031582	0.031817	0.0325208	0.0326335	0.033241	0.0331579	0.0335014	0.0340342	0.0342189	0.0344802	0.035063	0.0355353	0.0359278	0.0364558	0.0369037	0.0375412	0.0380707	0.0384717	0.0388697	0.0394546	0.039902	0.0405414	0.0416279	0.0429337	0.0448981	0.0474099	0.0515874	0.0581678	0.0654516	0.0749849	0.0859736	0.0973424	0.108965	0.122191	0.137063	0.149515	0.160456	0.171635	0.179889	0.184718	0.19242
0.0477883	0.043178	0.0396924	0.0385355	0.0386318	0.0397035	0.0387019	0.0398914	0.0408822	0.0413099	0.0421255	0.0426848	0.04318	0.0440335	0.0445614	0.0451009	0.0455249	0.04611	0.0464467	0.0471701	0.0476714	0.0484338	0.0492356	0.0498127	0.0504659	0.0512139	0.0518207	0.0524732	0.0529283	0.0536783	0.0544975	0.0557396	0.0571496	0.0588502	0.061541	0.0659338	0.0731106	0.0806081	0.0907009	0.10255	0.114384	0.126235	0.139773	0.154433	0.16679	0.177568	0.188819	0.196042	0.200445	0.208311
0.0421499	0.0333307	0.0308516	0.0280401	0.0270755	0.0268953	0.0268192	0.0268027	0.0274181	0.0275612	0.0280137	0.0283931	0.028714	0.0290855	0.0291013	0.0293844	0.0296297	0.0298667	0.0299686	0.0301708	0.0305118	0.0310563	0.0314098	0.0316879	0.0324805	0.0328618	0.0334476	0.0339257	0.0343572	0.0352091	0.0357957	0.0367084	0.0377941	0.039333	0.0409197	0.0439728	0.0485639	0.0538448	0.0603234	0.0674938	0.0743708	0.0812691	0.0895107	0.0984417	0.105156	0.111402	0.118244	0.122197	0.125281	0.129713
0.0454786	0.0374663	0.0322962	0.0306504	0.0297095	0.0292147	0.0290228	0.0287606	0.0291309	0.0291609	0.0289029	0.0297358	0.0298917	0.029787	0.0300752	0.0303649	0.030512	0.0305046	0.0307353	0.0311195	0.0313063	0.0317809	0.0321442	0.0327641	0.0332599	0.0336858	0.0343228	0.0346571	0.0350969	0.0359698	0.0366368	0.0378108	0.0393423	0.0410895	0.0432641	0.0472884	0.0529043	0.059325	0.0673626	0.0763939	0.0852993	0.0943865	0.105089	0.116377	0.125556	0.133905	0.143045	0.148839	0.152605	0.158395
0.0441417	0.0359661	0.0338227	0.0307435	0.0289403	0.0291954	0.0287816	0.029297	0.0292529	0.0295768	0.029451	0.0295764	0.0299858	0.0306044	0.0304369	0.0307091	0.0308325	0.030987	0.0313844	0.0315035	0.0318326	0.0322585	0.0325512	0.033253	0.0336747	0.0339927	0.0343072	0.0345437	0.0349621	0.035474	0.0362095	0.0369504	0.0383464	0.039836	0.0418739	0.0454326	0.0508381	0.0570763	0.0648275	0.0739608	0.0831465	0.0922147	0.102723	0.114332	0.124162	0.13259	0.141838	0.148619	0.152752	0.158357
0.0507084	0.0437141	0.0416244	0.0399529	0.0396293	0.0392304	0.0403722	0.0409995	0.0420994	0.0427232	0.0437969	0.044895	0.0454306	0.0459227	0.0462951	0.0472092	0.0475512	0.0484009	0.0490674	0.0495831	0.0502483	0.0510257	0.0516558	0.0523949	0.0531542	0.0537372	0.0545497	0.0549748	0.0555496	0.0567151	0.0575587	0.0587059	0.0602856	0.0622221	0.0644222	0.0684131	0.0750222	0.0822373	0.0906733	0.100899	0.111273	0.121072	0.132485	0.14559	0.156219	0.165362	0.175537	0.182547	0.186563	0.192641
0.0499915	0.0421487	0.0389288	0.0373369	0.0368891	0.0368784	0.0369128	0.0370664	0.0380485	0.0381915	0.0392653	0.0397867	0.0405229	0.0409484	0.0415454	0.0421805	0.0427771	0.0431425	0.0437686	0.0445673	0.0452825	0.0459399	0.04688	0.0475914	0.0486365	0.0493204	0.0504997	0.0512046	0.0521882	0.0530762	0.0541767	0.0556659	0.0572717	0.0594243	0.062053	0.066501	0.0736165	0.0810885	0.0903801	0.101089	0.111434	0.121507	0.133065	0.146132	0.156492	0.165481	0.175342	0.181872	0.185615	0.191857
0.0494976	0.0445481	0.0416816	0.03927	0.0405911	0.0411395	0.0411006	0.0419489	0.0428712	0.0434114	0.0444633	0.0451165	0.0459693	0.0468452	0.0472274	0.0475955	0.0482546	0.0486188	0.0490827	0.0497655	0.0502612	0.0509038	0.0518091	0.0523344	0.0532118	0.0540347	0.0547476	0.0554563	0.0560213	0.0568346	0.0578094	0.0592452	0.0612626	0.0635555	0.0666861	0.0719118	0.0801678	0.0889233	0.100042	0.113241	0.125952	0.138623	0.15304	0.168262	0.181178	0.19197	0.203745	0.211173	0.215246	0.222848
0.0419134	0.0326059	0.0305172	0.0278723	0.0266715	0.0265149	0.0261095	0.0267572	0.02668	0.0268826	0.0273956	0.0272256	0.0278609	0.0279933	0.0277769	0.0280801	0.0283231	0.0283106	0.0284548	0.0284893	0.028619	0.0289756	0.0291543	0.0294127	0.029899	0.0304236	0.0307509	0.0311976	0.0315409	0.0321083	0.0326458	0.0332959	0.0343567	0.0356266	0.0370205	0.0397224	0.0437603	0.0481133	0.0538138	0.0599149	0.0657903	0.0718272	0.078766	0.086443	0.0919633	0.0971879	0.102834	0.106111	0.108443	0.112094
0.0430238	0.0357014	0.0317001	0.0297384	0.0287745	0.0278873	0.0278113	0.0273639	0.0283551	0.0282936	0.0284452	0.0287683	0.0288724	0.0288638	0.0294181	0.0296863	0.0296606	0.0297539	0.03006	0.0300925	0.0305046	0.0308297	0.0310287	0.0315276	0.0320875	0.0324239	0.0331923	0.0336851	0.0341038	0.0348458	0.0354973	0.0362178	0.0373047	0.03852	0.0397781	0.0425506	0.0468412	0.0514324	0.0575315	0.0645162	0.071525	0.0786043	0.0872968	0.096701	0.104229	0.11104	0.118619	0.123492	0.126547	0.131138
0.043039	0.0343202	0.031183	0.0284831	0.0267638	0.0263368	0.0260788	0.0261432	0.0258265	0.0257355	0.0255693	0.0256599	0.0255669	0.0262448	0.025656	0.0262566	0.0257942	0.0258516	0.0259463	0.025918	0.0261031	0.0265087	0.0265517	0.0269765	0.0274712	0.0275455	0.027956	0.0282473	0.0286771	0.0291999	0.0296727	0.0304814	0.0318411	0.0330049	0.0347774	0.0379738	0.0427304	0.0481783	0.0551125	0.0633361	0.071356	0.0795212	0.0889926	0.099603	0.108175	0.115722	0.124087	0.129966	0.133633	0.138428
0.0491315	0.0406752	0.0373504	0.0350146	0.0346909	0.0345171	0.0346415	0.0352752	0.0361404	0.0366315	0.0376136	0.0379771	0.0382887	0.0388607	0.0389903	0.0396082	0.0398394	0.0404653	0.040625	0.0411422	0.0415794	0.0421853	0.0424942	0.0431998	0.0436463	0.0441689	0.0447847	0.0452866	0.045922	0.0468582	0.0475057	0.048478	0.0497703	0.0512469	0.0531473	0.056308	0.0617399	0.0677503	0.0753601	0.0842869	0.0935226	0.102664	0.113414	0.12569	0.136069	0.144927	0.154902	0.161928	0.166008	0.172198
0.0447602	0.0373348	0.034193	0.0313303	0.0308077	0.0298032	0.02958	0.0293345	0.0301474	0.0299863	0.0304044	0.0305124	0.0308332	0.0309963	0.0309999	0.0312253	0.0315246	0.0317874	0.0317564	0.0321074	0.0322015	0.0325254	0.0330465	0.0334777	0.0338763	0.0343737	0.0347161	0.0350253	0.0353786	0.0359538	0.0365591	0.0373924	0.0384696	0.0399075	0.0418788	0.0453033	0.0507864	0.057165	0.0654634	0.0749277	0.0849321	0.0951463	0.106848	0.119934	0.130766	0.140491	0.150359	0.157522	0.161775	0.168547
0.0475982	0.0418291	0.0380105	0.0353435	0.0347781	0.0349476	0.0338865	0.034962	0.0351863	0.0359069	0.0367258	0.0369224	0.0372595	0.037693	0.0382993	0.0384522	0.0390079	0.0391304	0.0390697	0.0395972	0.0400107	0.0405733	0.0411336	0.0417918	0.0424545	0.0431603	0.0437998	0.0443904	0.0447503	0.0457	0.046546	0.0476606	0.0493526	0.0511568	0.0538659	0.0584924	0.0655673	0.0731395	0.0824602	0.0935834	0.104424	0.115234	0.127343	0.140594	0.151596	0.160983	0.170892	0.177181	0.180517	0.18701
0.0514644	0.0419724	0.0386063	0.0344998	0.0334953	0.0331337	0.0329717	0.0331896	0.0330928	0.0326475	0.0323632	0.0322417	0.0327898	0.0325856	0.031916	0.0319547	0.0311979	0.031123	0.0307486	0.0302982	0.0304281	0.0306581	0.0309517	0.0307437	0.0310667	0.0314989	0.031661	0.0319673	0.0321645	0.0326452	0.0331807	0.033838	0.0349633	0.0364424	0.0381481	0.0412389	0.045964	0.0511364	0.0574387	0.0643587	0.0712737	0.0778829	0.0855638	0.0938599	0.100256	0.105914	0.112238	0.115886	0.118335	0.122709
0.0520907	0.0449418	0.0395672	0.0375718	0.0367199	0.0359927	0.0356094	0.0358839	0.0361061	0.0359547	0.036199	0.0366032	0.0364729	0.0364786	0.0366402	0.0366069	0.0365458	0.0364294	0.0362045	0.0363043	0.0362271	0.0365297	0.036654	0.0369354	0.0373828	0.0378367	0.03846	0.0389362	0.0391492	0.0399429	0.040634	0.0414847	0.0427221	0.0440253	0.0454906	0.0486505	0.0534437	0.058545	0.0652209	0.0728011	0.0807317	0.0884039	0.0976904	0.107507	0.115238	0.12239	0.130294	0.1351	0.137992	0.142619
0.0434248	0.0351342	0.0318737	0.0299423	0.0279599	0.028382	0.0282916	0.0295305	0.0295056	0.0300879	0.0303255	0.0309212	0.031326	0.0322243	0.0320358	0.0323517	0.0326832	0.0327263	0.033254	0.0335026	0.033948	0.0342902	0.0346799	0.0352989	0.0358081	0.0364852	0.0370764	0.0373687	0.038086	0.0390629	0.0397697	0.0409308	0.0424581	0.0441233	0.0461208	0.0499835	0.0552348	0.0612399	0.0687348	0.0770062	0.0852325	0.0934699	0.102799	0.113334	0.121686	0.128892	0.136829	0.142241	0.145578	0.150017
0.0473236	0.038374	0.0351634	0.0326811	0.0311935	0.0305689	0.0312831	0.0305464	0.0311407	0.0313523	0.0317221	0.031844	0.0322371	0.0319853	0.0325062	0.032544	0.0322895	0.0328378	0.0329038	0.0333294	0.0337764	0.0340838	0.0341829	0.0347353	0.0353109	0.0358915	0.036512	0.0368926	0.0376391	0.038601	0.0392716	0.0403402	0.0417015	0.043169	0.0450291	0.0480477	0.0528309	0.0581205	0.0647644	0.072434	0.0803446	0.0880787	0.0969763	0.107363	0.116199	0.123641	0.131783	0.137669	0.140952	0.145924
0.0501629	0.0432374	0.0387158	0.0367289	0.0363792	0.0357575	0.0357566	0.036296	0.0369034	0.0362106	0.0372646	0.0375408	0.0376293	0.0380722	0.0377009	0.0380003	0.0380362	0.0381647	0.038156	0.0382588	0.038427	0.0387581	0.0391203	0.0397072	0.0400532	0.0405	0.0409156	0.0413264	0.0417852	0.0423855	0.0432272	0.044163	0.0456383	0.0472645	0.0496088	0.0536259	0.0598127	0.066475	0.0748718	0.0844354	0.0940179	0.103403	0.114218	0.126271	0.136213	0.144776	0.153713	0.159684	0.163069	0.169037
0.0507107	0.0451148	0.0402216	0.0388471	0.0386715	0.0390743	0.0383925	0.0390564	0.0399548	0.0405665	0.0412547	0.0419846	0.0424641	0.0426927	0.0431787	0.0436172	0.0436656	0.0437185	0.0433678	0.0438926	0.0441016	0.0444432	0.0452294	0.0455409	0.0460551	0.0466579	0.0472382	0.0478169	0.0482711	0.0487998	0.049454	0.0501128	0.0510345	0.0521257	0.0536473	0.0567608	0.0618748	0.067155	0.0742829	0.0829839	0.0912761	0.0996802	0.109418	0.119935	0.128675	0.136138	0.144103	0.148574	0.151065	0.156038
[truncated: 126 more columns]
