# Supplementary material for: Recognition of maize seed varieties based on hyperspectral imaging technology and integrated learning algorithms
Source: PeerJ Comput Sci. 2023 May 10;9:e1354. doi: 10.7717/peerj-cs.1354 (PMC10280578; doi:10.7717/peerj-cs.1354)
Supplement: Supplemental Information 5 — Each row represents the hyperspectral data information of a seed. There are 60 rows representing the data information of 60 seeds. Each column represents the band information of each seed, and there are 176 columns in the table, representing 176 bands. [file peerj-cs-09-1354-s005.xls]

## Sheet: Sheet1
0.0451535	0.0369064	0.0345284	0.0329232	0.0323201	0.0323443	0.0323614	0.0332156	0.033863	0.0348062	0.0356291	0.0357639	0.0360619	0.0363972	0.0365869	0.0369335	0.036901	0.0369333	0.0371308	0.037376	0.0378044	0.0384013	0.0388489	0.0393184	0.0400828	0.0403919	0.0411234	0.0416146	0.0420269	0.0430648	0.0436375	0.0446387	0.0461783	0.0477934	0.0498647	0.0534745	0.0589043	0.064721	0.0720225	0.0803415	0.0882741	0.096487	0.106208	0.116567	0.124276	0.131667	0.139593	0.144215	0.147689	0.152895
0.0491005	0.0421338	0.0384023	0.0364347	0.0350202	0.0361087	0.0367661	0.0371629	0.038683	0.0393383	0.0406696	0.0411123	0.0418631	0.0423269	0.0424275	0.0432604	0.0438391	0.0438328	0.0442184	0.0446912	0.0452077	0.0458682	0.0465561	0.0473838	0.0481896	0.0489243	0.0495147	0.0502477	0.0510666	0.0519259	0.0531366	0.0543985	0.0563154	0.0585308	0.0610186	0.0655844	0.0722535	0.0795335	0.0888657	0.099183	0.109515	0.120342	0.13321	0.147222	0.158296	0.167888	0.178596	0.185799	0.18966	0.196288
0.0537653	0.0469563	0.0462702	0.0452074	0.0441701	0.0454137	0.0469774	0.0485623	0.0498308	0.0512372	0.0521008	0.0532047	0.0542481	0.0544611	0.0551691	0.055707	0.0562564	0.0564958	0.0568817	0.0575594	0.0581978	0.0591206	0.0598048	0.060959	0.0617202	0.0624549	0.0633418	0.0639613	0.0650461	0.0660187	0.0669689	0.0684632	0.0707651	0.07266	0.0753877	0.0804267	0.0881177	0.0963504	0.107304	0.11993	0.132724	0.14579	0.160793	0.177842	0.191967	0.203296	0.216101	0.225024	0.229702	0.236928
0.0520457	0.0450741	0.0426986	0.0414186	0.0422451	0.042255	0.0427973	0.0445561	0.0455781	0.0467718	0.0476188	0.0483437	0.0491115	0.0496778	0.0501732	0.0512854	0.0509294	0.0520611	0.0523661	0.053	0.0534651	0.0544438	0.0552452	0.0560854	0.0571315	0.0578748	0.0586958	0.0595345	0.0604304	0.0618779	0.0632602	0.0649201	0.0670989	0.0696172	0.0728607	0.0779391	0.0862231	0.094954	0.105319	0.118045	0.130667	0.143475	0.158363	0.175286	0.189583	0.201791	0.214897	0.223877	0.22885	0.236526
0.0640744	0.058315	0.0576323	0.0571992	0.0590569	0.0601917	0.0620972	0.0631115	0.0651656	0.0665112	0.0683319	0.0694069	0.0704021	0.0709042	0.071467	0.0721738	0.0724371	0.0729121	0.0731454	0.073769	0.0742587	0.0752672	0.0764092	0.0771824	0.0783305	0.079093	0.0798224	0.0808172	0.0817569	0.0829833	0.084468	0.0862722	0.0884941	0.0912972	0.0950767	0.101606	0.112047	0.123167	0.13713	0.15386	0.170554	0.187126	0.206337	0.227374	0.244932	0.259457	0.275086	0.285014	0.290128	0.29927
0.0547166	0.0501696	0.04875	0.0484459	0.0502322	0.0510902	0.0526979	0.0529091	0.0557375	0.0567952	0.0583256	0.0590524	0.0601459	0.0611963	0.0618611	0.0623401	0.0631909	0.0634677	0.0640138	0.0645328	0.0649607	0.0659519	0.0672198	0.0682246	0.0691071	0.0698229	0.0707304	0.0715179	0.0726131	0.0739753	0.0754873	0.0773226	0.0799742	0.0828958	0.0867861	0.0931912	0.10271	0.112879	0.125264	0.140167	0.154324	0.16823	0.184014	0.201266	0.215534	0.227269	0.239323	0.246692	0.250535	0.257872
0.0419578	0.0342693	0.0321582	0.0306794	0.0299298	0.0298524	0.0300515	0.0302222	0.0310405	0.031297	0.0326716	0.0326896	0.0331267	0.0338499	0.0342059	0.034761	0.0349441	0.0353701	0.0355333	0.0359478	0.0361281	0.0370175	0.0375133	0.0380743	0.0389053	0.0393548	0.0403041	0.0407761	0.0413164	0.0424425	0.0430988	0.044021	0.0454455	0.0470868	0.0490636	0.0523655	0.0575605	0.0628922	0.0698151	0.0777872	0.0855736	0.093565	0.103231	0.113574	0.121359	0.128713	0.136481	0.141027	0.144154	0.149498
0.0515694	0.0452126	0.0422151	0.0421662	0.0406528	0.0419891	0.0428361	0.043594	0.0448522	0.046185	0.0474159	0.0477267	0.0486853	0.0494899	0.0497234	0.0507255	0.0511405	0.0515622	0.052026	0.0525992	0.0530143	0.053782	0.0548846	0.0556326	0.0566039	0.0570979	0.057982	0.058457	0.0591902	0.0601944	0.0610708	0.0624462	0.0641961	0.0660393	0.0682783	0.072768	0.0794798	0.0870173	0.0966906	0.107569	0.118207	0.129373	0.142322	0.156323	0.167391	0.176995	0.187695	0.194534	0.198413	0.204489
0.0528663	0.0463035	0.0454884	0.0444316	0.0442714	0.0464053	0.047905	0.0496257	0.0507995	0.0523783	0.0538129	0.0550013	0.0561687	0.0572818	0.0578237	0.0589492	0.0596425	0.0603705	0.0614512	0.0624093	0.0631386	0.0643307	0.0652754	0.0663766	0.0674523	0.0684328	0.069329	0.0701393	0.0712196	0.072534	0.0735388	0.0750141	0.0772584	0.0791556	0.0815477	0.0864553	0.0937661	0.101446	0.111566	0.123463	0.135316	0.147088	0.160945	0.177159	0.190382	0.201116	0.213371	0.222073	0.226267	0.233026
0.0601692	0.0554503	0.0538026	0.0542356	0.0557568	0.0557866	0.0580051	0.059427	0.0608738	0.0624191	0.0642118	0.0653231	0.0664088	0.0678476	0.0686571	0.0696145	0.0701427	0.0712081	0.0722256	0.0732637	0.0741332	0.0754217	0.0765512	0.0778591	0.0788545	0.0799455	0.0809444	0.0816738	0.082856	0.0844905	0.0858001	0.0877661	0.0905512	0.0934311	0.0970333	0.103086	0.11296	0.123505	0.136362	0.151649	0.166475	0.181264	0.197993	0.217317	0.232916	0.245946	0.260312	0.269955	0.274744	0.283032
0.055872	0.0496476	0.0492354	0.0485885	0.049737	0.0503921	0.0520127	0.053292	0.0545904	0.0554044	0.0572166	0.0587237	0.0588369	0.0600005	0.060605	0.0612481	0.0616579	0.0622673	0.0630073	0.0637548	0.0646154	0.0653042	0.0667616	0.067512	0.0686804	0.069615	0.0703651	0.071059	0.0718365	0.0729939	0.0746446	0.0764154	0.0787796	0.0815084	0.0850144	0.091079	0.100496	0.110813	0.123386	0.138514	0.153499	0.168389	0.185571	0.204486	0.219826	0.232958	0.246817	0.255845	0.260519	0.268602
0.0562125	0.0522356	0.0509209	0.0509285	0.0528838	0.0537313	0.0562318	0.0567566	0.0589471	0.0595747	0.0613635	0.061559	0.0629097	0.0638076	0.0647362	0.0651409	0.0661959	0.0666656	0.0674962	0.0683476	0.0687637	0.0696811	0.0708541	0.0719811	0.0728726	0.0735997	0.0745833	0.0751011	0.0760691	0.0776497	0.0791493	0.0809628	0.0833867	0.0861089	0.0897603	0.0960337	0.105572	0.115655	0.128437	0.144018	0.159429	0.17476	0.192618	0.212455	0.228831	0.243199	0.257763	0.267306	0.272471	0.282012
0.0430978	0.0352439	0.0325241	0.0303355	0.0292756	0.0290382	0.0291263	0.0297843	0.0304169	0.0299303	0.0310838	0.0305973	0.031167	0.031746	0.0317681	0.0319262	0.0322967	0.0320322	0.0323929	0.0325093	0.0327486	0.0332449	0.0337493	0.0341533	0.0350344	0.0352455	0.0357647	0.0362902	0.0365474	0.0374075	0.0382282	0.0393499	0.0411576	0.0432309	0.0458125	0.0501323	0.0563057	0.0629917	0.0712512	0.0805404	0.0892454	0.0980662	0.108265	0.119068	0.127245	0.134802	0.142994	0.147701	0.151469	0.157221
0.0509358	0.0445032	0.0415876	0.0396431	0.0386216	0.0391808	0.0395688	0.0395221	0.0407279	0.0414079	0.041877	0.042467	0.0431517	0.0437186	0.0438324	0.0445807	0.0449077	0.0453912	0.045594	0.0462945	0.0467289	0.0472608	0.0480347	0.0487693	0.0497834	0.0501698	0.0509253	0.05163	0.0520385	0.0528692	0.0538867	0.0552814	0.0572754	0.059395	0.0621831	0.0672797	0.0746673	0.0830727	0.0938395	0.105688	0.117407	0.129336	0.142871	0.157608	0.168969	0.178887	0.190097	0.197401	0.201654	0.208647
0.0567906	0.0507319	0.0505778	0.0496209	0.0497395	0.0510503	0.0515617	0.0532702	0.0543943	0.0553069	0.05549	0.0568509	0.0572796	0.0583331	0.0586402	0.0593848	0.059764	0.0605292	0.0611233	0.0618341	0.0626173	0.0637027	0.0643078	0.0654707	0.0662666	0.0671127	0.0677452	0.0684914	0.0690681	0.0701313	0.070902	0.0722383	0.074311	0.0762235	0.079059	0.0843336	0.0922533	0.101204	0.112739	0.126324	0.139932	0.153714	0.169829	0.187802	0.202375	0.214904	0.228775	0.238693	0.244437	0.252475
0.0612931	0.0558578	0.0551184	0.0549115	0.0558658	0.0567671	0.0588044	0.0598062	0.0615637	0.0623361	0.0640641	0.0651988	0.0663728	0.0674895	0.0684761	0.0699798	0.0704218	0.071754	0.0730411	0.0742155	0.0752165	0.0764006	0.0774459	0.078847	0.0799221	0.0808096	0.0822982	0.0831397	0.0841546	0.08564	0.0870766	0.0885605	0.0905954	0.0927537	0.095291	0.100088	0.108342	0.117003	0.127782	0.1408	0.154608	0.168107	0.183714	0.20249	0.217795	0.230445	0.244559	0.254013	0.259109	0.26761
0.0590244	0.0532936	0.0530662	0.0535622	0.0553612	0.0563325	0.05847	0.0597567	0.0612758	0.0622238	0.063542	0.0649093	0.0655924	0.0665543	0.06716	0.0677366	0.0684063	0.0691807	0.070019	0.0708624	0.071445	0.0727137	0.0735609	0.0743788	0.0755169	0.0763721	0.0771367	0.0780323	0.0786372	0.0797307	0.0810846	0.0824409	0.0844312	0.0866173	0.08955	0.0948085	0.103587	0.112578	0.124811	0.139671	0.154696	0.170249	0.188662	0.209164	0.226369	0.241298	0.256984	0.267591	0.273143	0.283157
0.0512161	0.0461631	0.0448603	0.0443821	0.0454009	0.0471648	0.0479108	0.0483448	0.0499816	0.0507952	0.0516629	0.0519447	0.0527978	0.0535563	0.0537722	0.0544329	0.055197	0.055581	0.0563648	0.0568586	0.0575082	0.0580927	0.0590045	0.0598773	0.0606123	0.0612841	0.0621575	0.0625134	0.0633647	0.0643511	0.0654856	0.0670543	0.069162	0.0716629	0.074916	0.0804027	0.0889339	0.098343	0.110547	0.12564	0.140641	0.155841	0.173941	0.193184	0.209339	0.223612	0.237814	0.247323	0.252635	0.261636
0.0434016	0.0348708	0.0335704	0.0304173	0.0298582	0.0299293	0.0305221	0.0301766	0.0309578	0.0312069	0.0313876	0.0317154	0.0322878	0.0327196	0.0328193	0.0333374	0.0334037	0.0334969	0.0338648	0.0339129	0.0343128	0.0347758	0.0354268	0.0357887	0.0364238	0.0369084	0.037391	0.0379372	0.0383659	0.0390162	0.0396472	0.0406476	0.0418048	0.0434477	0.0455281	0.0487305	0.053995	0.0595863	0.0668468	0.0749864	0.0829096	0.091676	0.101851	0.112806	0.121597	0.129771	0.138286	0.143648	0.147677	0.153755
0.0494209	0.0435802	0.0409793	0.0394135	0.038724	0.0393714	0.0394999	0.0398977	0.0407544	0.0413199	0.0418293	0.0423619	0.0431105	0.0436622	0.0436656	0.0443045	0.0447357	0.0447672	0.0452021	0.0456719	0.0460561	0.0465272	0.0470754	0.0478178	0.0484237	0.0489806	0.0495656	0.050052	0.0505745	0.0512339	0.0517396	0.0529803	0.054188	0.0557314	0.0576703	0.0618497	0.0679725	0.0748144	0.0840494	0.0950122	0.106244	0.118422	0.132515	0.147732	0.159717	0.170686	0.182484	0.190186	0.194956	0.202032
0.0519008	0.046026	0.0456253	0.0447447	0.0441525	0.046355	0.0468438	0.0486466	0.049636	0.0506013	0.0516375	0.0524283	0.053606	0.0548212	0.0556742	0.0566386	0.0575928	0.0583919	0.0594043	0.0604239	0.0612645	0.0625206	0.0635921	0.0648838	0.0660844	0.0670496	0.0679821	0.0686593	0.069621	0.0707373	0.0717476	0.0735122	0.0760839	0.0783945	0.0816941	0.0873681	0.0956407	0.104597	0.115955	0.128777	0.141016	0.15298	0.166771	0.18248	0.194591	0.204447	0.216346	0.224711	0.229338	0.236327
0.0549495	0.0487133	0.0477408	0.0454752	0.0464151	0.0465048	0.0472019	0.0477471	0.0492712	0.0489024	0.0495784	0.0501325	0.0506705	0.0510015	0.0518882	0.0525573	0.0526809	0.0537982	0.0544866	0.0550705	0.0557802	0.0568034	0.0576713	0.0586278	0.059462	0.0603457	0.061292	0.0617884	0.0627705	0.0639031	0.0648577	0.0661032	0.0681687	0.070313	0.0729948	0.0777467	0.0855464	0.0942592	0.105029	0.118129	0.131915	0.145788	0.161846	0.180086	0.195555	0.208614	0.222713	0.23335	0.239408	0.248351
0.0581979	0.0515652	0.0515431	0.0522868	0.0542549	0.0552388	0.0566013	0.0576334	0.0591642	0.0601054	0.060682	0.0620249	0.0630435	0.0637555	0.0640492	0.0650327	0.0652731	0.0660644	0.0666215	0.0673617	0.0682925	0.0693043	0.0701632	0.070697	0.0720793	0.0727645	0.0733937	0.0741817	0.0747508	0.0757922	0.0768121	0.0783954	0.0807781	0.0833936	0.0869333	0.0930276	0.102453	0.112588	0.125188	0.140318	0.155254	0.170173	0.187153	0.206098	0.221629	0.234724	0.249079	0.258678	0.263489	0.272769
0.0546396	0.0507214	0.0497259	0.0496111	0.051178	0.0528637	0.0542051	0.0543017	0.0560126	0.0568299	0.0577032	0.0580803	0.0589506	0.0596879	0.0604885	0.0610547	0.061794	0.0622202	0.0630496	0.0636297	0.0641295	0.0650073	0.0660294	0.0668601	0.0677409	0.0683107	0.0692461	0.0696159	0.0703548	0.0715127	0.0725607	0.0741933	0.0765763	0.0790733	0.0826232	0.0883984	0.0973649	0.107211	0.119559	0.1348	0.149747	0.164995	0.182452	0.201348	0.217174	0.230356	0.24447	0.253549	0.258643	0.267912
0.0449369	0.0367294	0.0349002	0.0327393	0.0318461	0.0321693	0.0322346	0.0324097	0.0335371	0.0337219	0.0336021	0.0338777	0.0344355	0.0350518	0.0348122	0.0353793	0.035611	0.0356634	0.0358685	0.0359713	0.0363925	0.0368222	0.0372026	0.0373159	0.0381347	0.0385542	0.0388992	0.0394077	0.0398211	0.0403935	0.0410326	0.0416997	0.0430139	0.0444565	0.0463496	0.0497547	0.0549922	0.0608869	0.0685123	0.0774238	0.0861072	0.095217	0.105637	0.116962	0.125814	0.134074	0.142663	0.14801	0.151834	0.157969
0.0493956	0.0415264	0.0384311	0.0355417	0.0342777	0.0335689	0.0331153	0.0320466	0.0324977	0.032416	0.031841	0.0321653	0.0321399	0.0319446	0.03171	0.031971	0.0320051	0.0318014	0.0320127	0.0318986	0.0322238	0.0322928	0.0327895	0.0332895	0.0337912	0.0341469	0.034566	0.0348131	0.0349649	0.0356501	0.0362345	0.0373658	0.0390753	0.0410654	0.0437729	0.0484441	0.0552999	0.0633325	0.0738591	0.0859052	0.0979982	0.110699	0.125039	0.140209	0.152632	0.163643	0.175756	0.18409	0.188952	0.196399
0.0521505	0.0456188	0.0446871	0.0430102	0.0416496	0.0420547	0.0427056	0.04355	0.0436144	0.0437067	0.0442478	0.0447625	0.0451481	0.0455803	0.046085	0.0463228	0.0465653	0.0466991	0.0473307	0.0477653	0.0484082	0.049193	0.0497843	0.0508552	0.0515674	0.0523909	0.0528153	0.0531907	0.0538422	0.0546765	0.0556165	0.0570899	0.0594598	0.0620183	0.065417	0.0714254	0.0801156	0.0897868	0.10214	0.116	0.129748	0.143176	0.158054	0.174951	0.188214	0.199239	0.211677	0.221017	0.225617	0.232758
0.0522112	0.0476503	0.0466922	0.0459797	0.0471019	0.0474959	0.0488634	0.0491759	0.0504715	0.051069	0.0525999	0.0527616	0.0538776	0.0547087	0.0553882	0.0563396	0.0565162	0.0576655	0.0581338	0.0589954	0.0598924	0.0610833	0.0620873	0.0632871	0.0641078	0.0649417	0.0658914	0.0662994	0.0670089	0.0682565	0.0695857	0.07119	0.07359	0.0763311	0.0798132	0.085323	0.0942257	0.103677	0.114644	0.12783	0.140753	0.153372	0.168043	0.184689	0.198338	0.209922	0.222716	0.231704	0.236412	0.2444
0.0579733	0.0512695	0.0507226	0.0500657	0.0525886	0.0534232	0.0545158	0.0563373	0.0574156	0.0579644	0.0594911	0.060948	0.0620196	0.0630611	0.0642605	0.0651635	0.0660971	0.0670914	0.0679446	0.0691254	0.0702621	0.0716046	0.0731351	0.0742005	0.0757109	0.0766701	0.077749	0.0786501	0.0796008	0.0809625	0.0825337	0.0845121	0.0872414	0.0904575	0.0947801	0.101554	0.111714	0.122477	0.135542	0.150626	0.165389	0.179811	0.196215	0.214412	0.228932	0.241489	0.255102	0.263811	0.268364	0.277355
0.0533702	0.0492515	0.0476313	0.047069	0.0487098	0.0492534	0.0508119	0.0506304	0.0518255	0.0523723	0.0536649	0.053559	0.0543412	0.0550715	0.0557736	0.0559782	0.0565168	0.0566822	0.0574978	0.0582022	0.0586275	0.0595443	0.0604216	0.0612254	0.0619757	0.0624988	0.0630673	0.0634585	0.064058	0.0648924	0.0660537	0.0674724	0.0696164	0.0720637	0.0754921	0.0812009	0.0899669	0.0994469	0.11187	0.126822	0.141515	0.156295	0.173275	0.191256	0.206549	0.219424	0.232875	0.241866	0.247344	0.256489
0.0530988	0.0448444	0.0428207	0.0398279	0.0396634	0.0397904	0.0397846	0.0404366	0.0411412	0.0410248	0.0412646	0.0418438	0.0419325	0.0423313	0.0425859	0.0429528	0.0429011	0.0430449	0.0433361	0.0436152	0.0436073	0.0441857	0.0446138	0.0451332	0.0457965	0.0460502	0.046579	0.0469948	0.0474333	0.0481345	0.0489014	0.0499602	0.0513981	0.0534302	0.0558473	0.0601908	0.0668594	0.0740151	0.0833178	0.0938385	0.10392	0.11428	0.126089	0.139258	0.14921	0.158032	0.167544	0.173277	0.177227	0.183592
0.0510854	0.0450862	0.0416882	0.0403998	0.0405937	0.040854	0.0409047	0.040719	0.0420589	0.0424202	0.0428063	0.0435256	0.0436567	0.0441596	0.0443039	0.0451144	0.0452128	0.0454641	0.0457534	0.0460389	0.0465867	0.0469929	0.047464	0.0481997	0.0488968	0.0494062	0.0500002	0.050355	0.0506897	0.0515248	0.052375	0.0535898	0.0554583	0.0574812	0.059963	0.0647211	0.0715962	0.0791747	0.0890402	0.100239	0.111316	0.122825	0.136206	0.150756	0.162178	0.172772	0.183971	0.191576	0.195915	0.202663
0.0512241	0.0447236	0.0432952	0.0422656	0.0414927	0.0420942	0.0425545	0.0439678	0.0438146	0.0442426	0.0449568	0.0457912	0.0455576	0.0464997	0.0468103	0.0470831	0.0474782	0.0476758	0.0483667	0.0486145	0.0490571	0.0498583	0.0504305	0.0514536	0.0521685	0.0526963	0.0531594	0.0537187	0.0542093	0.0549729	0.0557949	0.0570399	0.0591878	0.0612302	0.0637554	0.0688112	0.0760172	0.0838598	0.0939206	0.10569	0.117577	0.129683	0.143811	0.159613	0.172565	0.183466	0.195724	0.204111	0.209127	0.216101
0.0521492	0.045875	0.0448022	0.0435528	0.0446639	0.0445252	0.0461259	0.0464441	0.0475309	0.0484368	0.0489715	0.050099	0.0508072	0.0515335	0.052331	0.0535535	0.0537984	0.0548506	0.055475	0.056348	0.0571968	0.0583346	0.0596882	0.0608611	0.0617694	0.0626443	0.0635055	0.0642245	0.0650443	0.0664929	0.0679421	0.0699144	0.0726754	0.0758489	0.0800241	0.0861698	0.0957449	0.105881	0.117812	0.131637	0.145604	0.159083	0.174348	0.191727	0.206076	0.217897	0.230955	0.239607	0.244137	0.251932
0.0511355	0.0446137	0.0415441	0.0412439	0.0425553	0.0427118	0.0438468	0.0445239	0.0452585	0.045847	0.0463159	0.0472848	0.0477828	0.0484618	0.0490866	0.0496857	0.050051	0.0507331	0.0512487	0.0516686	0.0522558	0.0531888	0.0539653	0.0545334	0.0554498	0.0560731	0.0565546	0.0573195	0.0577552	0.0585726	0.059543	0.0607091	0.0622549	0.0641517	0.0667684	0.071157	0.0781501	0.0856234	0.0951418	0.106741	0.118634	0.130938	0.145551	0.162095	0.175923	0.187705	0.200242	0.208605	0.213621	0.221442
0.0534614	0.0485086	0.0470832	0.0471512	0.0485937	0.0498149	0.051018	0.0515846	0.0533216	0.0538647	0.0549714	0.0554391	0.0563057	0.0575501	0.0581506	0.0586486	0.0593063	0.0598897	0.0605979	0.0613702	0.0619411	0.0625815	0.0638861	0.0648419	0.065622	0.0663351	0.066983	0.0673545	0.0680437	0.0691455	0.070445	0.0721893	0.074771	0.0778601	0.0818182	0.0883084	0.0978036	0.107962	0.120567	0.135616	0.149841	0.163775	0.179631	0.196965	0.211219	0.223153	0.235921	0.244088	0.248541	0.256873
0.0629413	0.0551933	0.053338	0.0512065	0.0506928	0.0504817	0.0517419	0.0518946	0.0528002	0.0530051	0.0533158	0.0537307	0.0543268	0.0546603	0.0547961	0.0550232	0.054756	0.0549568	0.0548431	0.0549677	0.0550749	0.0555078	0.0559649	0.0561619	0.0570232	0.0575359	0.0580187	0.058446	0.0590003	0.0598242	0.0607964	0.0617726	0.0634974	0.0656776	0.0682874	0.0728619	0.0800898	0.0880151	0.0980678	0.109678	0.120766	0.1324	0.145971	0.160816	0.172035	0.182349	0.193141	0.1993	0.203569	0.210365
0.0505533	0.0432618	0.0398373	0.038315	0.0378901	0.0373611	0.0377053	0.037968	0.0389279	0.0394131	0.039421	0.0402197	0.0404916	0.0408915	0.0411528	0.0418473	0.042149	0.0421906	0.0426944	0.042912	0.0434551	0.0439211	0.0444192	0.0451634	0.0458968	0.0465499	0.0473406	0.0479087	0.0483823	0.0493177	0.050136	0.0513854	0.0533911	0.0554009	0.0576714	0.0621145	0.0687299	0.0760953	0.085605	0.0966324	0.107926	0.119665	0.133802	0.149386	0.161787	0.173196	0.184989	0.19306	0.198059	0.205095
0.0485407	0.0409022	0.0382208	0.0373049	0.035707	0.0360432	0.0359153	0.0363961	0.0363204	0.0368027	0.0373122	0.0373465	0.0378434	0.0383394	0.0380165	0.0387206	0.0386623	0.0387122	0.0391614	0.0393506	0.0398507	0.0402766	0.0405815	0.0413079	0.0416361	0.0419849	0.0423926	0.0427026	0.0431031	0.0435985	0.04412	0.0449206	0.0463796	0.0478356	0.0498369	0.0536058	0.0593096	0.0659411	0.0747472	0.0851781	0.0960791	0.107394	0.120645	0.13519	0.14751	0.157973	0.169303	0.177666	0.182947	0.189632
0.0507642	0.0431563	0.040836	0.0391871	0.0390624	0.037947	0.0387927	0.0387515	0.039418	0.039419	0.0402555	0.0399868	0.0402597	0.0404875	0.0412072	0.0418432	0.0416309	0.0422684	0.0426322	0.0428469	0.0435333	0.0440221	0.0445584	0.0451687	0.0457424	0.0462992	0.046704	0.0470656	0.0475111	0.0482844	0.0491048	0.0502799	0.0521014	0.0543644	0.0572881	0.0620073	0.0696559	0.0783685	0.0890507	0.102141	0.115821	0.130218	0.146185	0.164203	0.179555	0.192405	0.206154	0.215665	0.221321	0.229264
0.0557481	0.0500867	0.0480559	0.0474406	0.0487261	0.0492178	0.0510652	0.0520445	0.0527148	0.0539768	0.0548344	0.0560641	0.0567476	0.0574962	0.0581786	0.059025	0.059455	0.0602443	0.0609759	0.0614129	0.062144	0.0628594	0.0640988	0.0647256	0.0656842	0.0663423	0.0673913	0.0680948	0.0686734	0.0695859	0.0707188	0.0720948	0.0738437	0.076188	0.0790536	0.0838966	0.0919463	0.100407	0.111238	0.124428	0.138073	0.152163	0.168821	0.187713	0.203346	0.216724	0.230912	0.240478	0.245966	0.254982
0.0725031	0.0712541	0.070522	0.0715436	0.0741722	0.0753419	0.0767722	0.077325	0.0796041	0.0800716	0.0810391	0.0816339	0.082159	0.0832604	0.0839852	0.0843716	0.0852233	0.0856381	0.0859113	0.0865716	0.0868731	0.0878208	0.088792	0.0896052	0.090634	0.0911456	0.0920334	0.0925754	0.0931261	0.0942183	0.0951984	0.0968703	0.0991386	0.101618	0.105131	0.111285	0.121573	0.131907	0.14565	0.162392	0.178787	0.194971	0.213571	0.233729	0.250424	0.264376	0.279149	0.288542	0.29346	0.302953
0.053041	0.0442071	0.0418872	0.0392142	0.0392786	0.0390615	0.0394593	0.0397696	0.0406354	0.0413928	0.0415158	0.0419484	0.0424808	0.0429404	0.0434299	0.0435851	0.0436571	0.0440036	0.0438786	0.0440575	0.0442088	0.0449119	0.0454419	0.0455512	0.0466083	0.047269	0.0478117	0.0484157	0.0490215	0.0499704	0.050997	0.052212	0.0541113	0.056366	0.0587469	0.0633224	0.0700152	0.0771134	0.0863922	0.0963503	0.106137	0.115903	0.127403	0.139805	0.149161	0.157518	0.166599	0.171868	0.175371	0.181312
0.0536812	0.0474736	0.043621	0.0420589	0.041646	0.0415659	0.0417056	0.0418069	0.042377	0.0429806	0.0432708	0.0438818	0.0446094	0.0445484	0.0447152	0.0453098	0.0452145	0.0456127	0.0458268	0.0458662	0.0462315	0.0466225	0.0471652	0.0477515	0.0484548	0.0488262	0.0496285	0.0499667	0.0502084	0.0511844	0.0520233	0.0533162	0.0549647	0.0569969	0.0592318	0.0637538	0.0702642	0.0774045	0.0867915	0.0971838	0.107441	0.118174	0.130301	0.143807	0.154231	0.163883	0.174023	0.180415	0.184229	0.190189
0.0582572	0.0495845	0.0479854	0.0470106	0.045909	0.0468393	0.0474665	0.0480532	0.0485478	0.0494491	0.0502664	0.0507135	0.0514545	0.0522236	0.0525035	0.0527491	0.0530045	0.0533792	0.0535698	0.0539891	0.0542538	0.0548764	0.0553285	0.0563016	0.0568791	0.0573117	0.0579209	0.0583379	0.0588875	0.0596564	0.0603566	0.061485	0.0635187	0.0652676	0.0679084	0.0727312	0.0797548	0.0878402	0.0983119	0.11038	0.122545	0.135003	0.149836	0.16593	0.179246	0.190308	0.202968	0.211581	0.216579	0.223139
0.0512778	0.0437272	0.0413645	0.0399579	0.0401987	0.0396048	0.0405156	0.0407473	0.0415897	0.0425249	0.0432863	0.0436689	0.0442268	0.044637	0.0450466	0.0458339	0.0457526	0.0464469	0.0467764	0.0469726	0.0473968	0.047864	0.0486761	0.0494027	0.0501093	0.050628	0.051372	0.0516966	0.0522174	0.0532673	0.0540468	0.0552486	0.0571327	0.0590811	0.0617241	0.0661075	0.0732862	0.0810363	0.0905489	0.101723	0.113555	0.125393	0.138659	0.153954	0.166504	0.177449	0.189548	0.198008	0.203027	0.210242
0.0709319	0.0652586	0.0658059	0.066845	0.0676833	0.0693731	0.0720254	0.0728152	0.0746256	0.0753899	0.0771069	0.0782863	0.079287	0.0799794	0.0806178	0.0815736	0.082002	0.0828906	0.0836801	0.0843178	0.0848408	0.0856324	0.0866803	0.0874548	0.088691	0.0895429	0.0904781	0.0914686	0.0920156	0.0930602	0.0942207	0.0954267	0.0969737	0.0989158	0.101387	0.10615	0.114474	0.123072	0.134423	0.148064	0.162124	0.176529	0.193415	0.212609	0.228677	0.242017	0.256484	0.265813	0.270443	0.279048
0.0643015	0.0595448	0.0575536	0.0577028	0.0588466	0.0600986	0.0618229	0.0621073	0.0636383	0.0643396	0.0651878	0.066037	0.0666661	0.0671663	0.0676888	0.0680807	0.0685237	0.0689281	0.069004	0.0694778	0.0693752	0.0696316	0.0707243	0.0713631	0.0722774	0.0728048	0.0736508	0.073803	0.0745298	0.075491	0.0764156	0.0775028	0.0794019	0.0813482	0.0841705	0.0896124	0.098091	0.107318	0.11914	0.134064	0.148616	0.163031	0.179779	0.197988	0.21307	0.225695	0.239261	0.247671	0.25212	0.260254
0.0539174	0.0459679	0.0439105	0.0410469	0.0408152	0.0406206	0.0415216	0.0426938	0.0433299	0.0436313	0.0445572	0.0450243	0.0453459	0.045915	0.0459469	0.0464971	0.0463161	0.0461304	0.0457705	0.0460526	0.0459364	0.0463261	0.0467354	0.0468825	0.047521	0.047857	0.0483746	0.0489087	0.0494329	0.0502116	0.0508572	0.0516824	0.0530037	0.0546289	0.0562338	0.0593724	0.0647032	0.0700885	0.0774473	0.0854581	0.0934903	0.101283	0.111039	0.12137	0.129224	0.136034	0.143654	0.147717	0.150265	0.155022
0.0509911	0.0450797	0.0409934	0.0387398	0.038908	0.0385955	0.0383319	0.0383986	0.0390614	0.0393529	0.0394355	0.0400635	0.0405617	0.0407601	0.040824	0.0410546	0.0409013	0.0409232	0.0408844	0.0410228	0.0413497	0.0415944	0.0418965	0.0426119	0.0430443	0.0434853	0.0441538	0.0447531	0.0449928	0.0460212	0.0468483	0.0480523	0.0498305	0.0518997	0.054208	0.0585026	0.0648931	0.0717607	0.0804544	0.0902581	0.100269	0.110538	0.122415	0.135616	0.145783	0.15503	0.164743	0.170485	0.17389	0.179549
0.04942	0.0414946	0.0383398	0.0368207	0.0356553	0.0362005	0.0364253	0.0371095	0.0372625	0.0383434	0.0388689	0.0392183	0.0399044	0.0407711	0.0406174	0.0413972	0.0414433	0.0414924	0.0419347	0.0420984	0.0425366	0.0432024	0.0435293	0.0443973	0.0447408	0.0452177	0.0458705	0.0463317	0.0470644	0.0478592	0.0486675	0.0499612	0.0516458	0.0532728	0.0553609	0.059222	0.0648217	0.0711494	0.0791744	0.0885395	0.097772	0.107489	0.119221	0.132359	0.143309	0.152707	0.163206	0.170807	0.174767	0.180598
0.0621519	0.0543904	0.0528146	0.0510582	0.0510656	0.0501668	0.0508907	0.051013	0.0522853	0.0526664	0.0530258	0.0533907	0.0537866	0.0542054	0.0542779	0.0546483	0.054011	0.0544441	0.0545064	0.0547326	0.0547426	0.0552085	0.0557112	0.0563071	0.0567298	0.0573246	0.0577036	0.0580883	0.058564	0.0594133	0.0604635	0.061616	0.0634711	0.0657634	0.0687485	0.073708	0.0815984	0.0903641	0.101102	0.114051	0.127206	0.140543	0.155989	0.173209	0.187708	0.199957	0.213053	0.222094	0.22713	0.234718
0.0562373	0.048841	0.0457588	0.0447046	0.0448529	0.045168	0.0461107	0.0470134	0.0475034	0.0485196	0.048884	0.0498123	0.0504435	0.0507604	0.0510405	0.0514308	0.0515424	0.0514352	0.0511705	0.0514932	0.0516289	0.0522336	0.053068	0.05328	0.0541548	0.0545225	0.055012	0.0555036	0.0558912	0.056579	0.0576133	0.0589062	0.0607139	0.0628448	0.0660042	0.070954	0.0788549	0.0874555	0.098217	0.110923	0.123829	0.136498	0.151258	0.167504	0.18115	0.192621	0.204708	0.212799	0.216643	0.223977
0.0629218	0.0577838	0.0555331	0.0542764	0.0551022	0.0562496	0.0569833	0.0574271	0.0586778	0.0601329	0.0612705	0.0613266	0.0622858	0.0632857	0.0636943	0.0639619	0.0642786	0.0646937	0.0643854	0.0647984	0.0649304	0.0655426	0.0664264	0.0675911	0.0685689	0.0693828	0.0701467	0.0706026	0.0714039	0.0727734	0.0738304	0.0755354	0.0779099	0.080487	0.0840912	0.0903718	0.10002	0.109877	0.122544	0.137455	0.151618	0.165678	0.181553	0.198663	0.212547	0.224167	0.236292	0.243432	0.246645	0.253661
0.0386684	0.0297933	0.0272908	0.0233322	0.0227004	0.0222113	0.02191	0.0219762	0.0220211	0.022505	0.0219347	0.021937	0.0223096	0.0223518	0.0222043	0.0224559	0.0219456	0.0219267	0.0220155	0.0220197	0.0220054	0.0224231	0.022735	0.02288	0.0234423	0.0237009	0.023966	0.0243131	0.0246073	0.0250232	0.0254916	0.0260621	0.0269725	0.0280351	0.0292659	0.0313682	0.0346192	0.0382571	0.0430596	0.0484222	0.0537168	0.0592333	0.0655373	0.0723819	0.0779138	0.0828113	0.0879556	0.0912598	0.0934673	0.0969986
0.0600543	0.0538619	0.0482849	0.0466134	0.0463932	0.0454107	0.0456297	0.0463644	0.046938	0.0475104	0.0475561	0.0481946	0.0489361	0.0488486	0.0486553	0.0488815	0.0486887	0.0484755	0.0480885	0.0479979	0.048172	0.0483612	0.0484567	0.0488473	0.0494776	0.0499156	0.0507992	0.0512523	0.0515166	0.0525473	0.0533916	0.0545935	0.0563887	0.058029	0.0601758	0.0642292	0.0702242	0.0765819	0.0846596	0.0942472	0.103603	0.113311	0.124415	0.136229	0.145787	0.153981	0.163098	0.168364	0.171286	0.175957
0.0663525	0.0589629	0.0563483	0.0547853	0.0538814	0.0542681	0.055485	0.0563122	0.0566997	0.057746	0.0580832	0.0586384	0.0589247	0.0594731	0.0593967	0.059812	0.059696	0.0592052	0.0593764	0.0592404	0.0594037	0.0597338	0.0599749	0.0607279	0.0612237	0.0617845	0.0625343	0.0630546	0.0637208	0.0647218	0.0657383	0.0672732	0.0695594	0.0716527	0.0744362	0.0794427	0.0866836	0.0943041	0.104262	0.115645	0.126664	0.137805	0.151053	0.165658	0.177145	0.18703	0.197638	0.205255	0.208989	0.214443
0.0620751	0.0534777	0.0514046	0.0506832	0.051318	0.0508338	0.0528741	0.0540608	0.0554833	0.0565314	0.0580833	0.0588752	0.0591573	0.0595393	0.0602311	0.060865	0.0604917	0.0610857	0.0615899	0.0617228	0.0619166	0.0628162	0.0633547	0.0642224	0.0647077	0.0653681	0.0662863	0.0666848	0.0675275	0.0687098	0.0699577	0.0713549	0.0731731	0.0753766	0.0780098	0.0822232	0.0893801	0.09676	0.105579	0.116294	0.126804	0.137123	0.149467	0.163552	0.175298	0.184928	0.195599	0.202622	0.206175	0.212123
0.0551172	0.0472842	0.0439037	0.0438598	0.0445103	0.0445682	0.0454527	0.0467675	0.0482238	0.0494785	0.0503534	0.0518073	0.0521401	0.0529225	0.0533402	0.0537001	0.0540763	0.0543283	0.0544562	0.0546205	0.0549297	0.0555887	0.0565356	0.0571077	0.0581248	0.0585952	0.0594378	0.0600729	0.0605531	0.0615007	0.0625128	0.0637563	0.0653063	0.0672933	0.069886	0.0743542	0.0814299	0.0886368	0.0978157	0.108504	0.119085	0.129764	0.141871	0.155669	0.166932	0.176333	0.186621	0.192903	0.196105	0.202192
0.0444459	0.0392905	0.0362636	0.0342012	0.0343472	0.0346285	0.0346915	0.0350246	0.0360239	0.0369082	0.0371861	0.0376585	0.0382171	0.0385197	0.039223	0.0389649	0.0394677	0.0395807	0.0392676	0.0394934	0.0393948	0.0397444	0.0404431	0.041006	0.0415551	0.0421156	0.0424887	0.0430138	0.0435623	0.0441625	0.0447525	0.0456215	0.0466826	0.0479007	0.0497225	0.0530793	0.0582325	0.0637152	0.0708824	0.0797446	0.088766	0.0982797	0.109558	0.121869	0.132386	0.14153	0.150962	0.156979	0.16038	0.166145
[truncated: 126 more columns]
