# Supplementary material for: Recognition of maize seed varieties based on hyperspectral imaging technology and integrated learning algorithms
Source: PeerJ Comput Sci. 2023 May 10;9:e1354. doi: 10.7717/peerj-cs.1354 (PMC10280578; doi:10.7717/peerj-cs.1354)
Supplement: Supplemental Information 6 — Each row represents the hyperspectral data information of a seed. There are 60 rows representing the data information of 60 seeds. Each column represents the band information of each seed, and there are 176 columns in the table, representing 176 bands. [file peerj-cs-09-1354-s006.xls]

## Sheet: Sheet1
0.0377586	0.0309196	0.0276392	0.0259206	0.0249451	0.0241167	0.0244686	0.0246098	0.0252601	0.0253178	0.0260114	0.0261869	0.0260571	0.0263456	0.0269838	0.026919	0.0267423	0.0270486	0.0271038	0.0273296	0.027534	0.0281955	0.0284447	0.0287955	0.029462	0.0297602	0.0304739	0.0309382	0.0314234	0.0321901	0.0327036	0.0338931	0.0350075	0.036645	0.0383235	0.0413083	0.0454693	0.0499527	0.0557276	0.061919	0.0677903	0.0735794	0.0805092	0.0878678	0.0932619	0.0981812	0.103516	0.10684	0.109222	0.113128
0.0436574	0.0371698	0.0327331	0.0315419	0.0302557	0.0307438	0.0312509	0.0311617	0.0321527	0.0332661	0.0338053	0.0344722	0.0352313	0.0352881	0.0357906	0.036326	0.0363622	0.0365721	0.0368406	0.0373452	0.0376341	0.0383162	0.0388642	0.039537	0.04023	0.0407577	0.0414565	0.042186	0.0427254	0.0435906	0.0444185	0.0454629	0.0471408	0.0490245	0.050992	0.0549705	0.060196	0.0660155	0.0733425	0.0816144	0.0895949	0.0980419	0.107756	0.118525	0.126807	0.134023	0.142258	0.14754	0.150811	0.155806
0.0488186	0.0416242	0.0408	0.0400402	0.0392937	0.0403687	0.0412841	0.0429213	0.0439883	0.0452148	0.0463083	0.0473125	0.0485429	0.0491377	0.0496058	0.0503704	0.0506489	0.0507685	0.0514562	0.052098	0.0528025	0.0536149	0.0543532	0.0555722	0.0563506	0.0574593	0.0582968	0.0590538	0.0600693	0.0612213	0.0622679	0.0637138	0.0661076	0.0681867	0.0708368	0.0758203	0.0828312	0.0900927	0.0994558	0.10993	0.120108	0.130225	0.142034	0.155571	0.166458	0.175235	0.185166	0.192042	0.19525	0.200976
0.0438568	0.0367724	0.0342369	0.0322269	0.0320269	0.0313889	0.0324162	0.0325996	0.0337335	0.034621	0.0353833	0.0360936	0.0365474	0.0368999	0.037701	0.0383395	0.0381957	0.0388423	0.0393196	0.0397767	0.0403278	0.0410194	0.0417859	0.0427454	0.0434399	0.0441357	0.0449887	0.0457843	0.0464945	0.0476879	0.0487832	0.0499778	0.0518615	0.0537656	0.0565377	0.0607791	0.0677189	0.0749883	0.0839778	0.0947282	0.105769	0.116809	0.129279	0.143261	0.155128	0.164784	0.175307	0.182686	0.186572	0.192927
0.0535278	0.0472643	0.0448584	0.0448602	0.0458697	0.0469426	0.0480289	0.0496221	0.0512326	0.0521385	0.0544651	0.0553974	0.056231	0.057367	0.0580096	0.0585035	0.0592102	0.0597966	0.0600914	0.0606146	0.0613114	0.062482	0.0636144	0.0643464	0.0653465	0.0664875	0.0673154	0.0684429	0.0694654	0.0706892	0.0721248	0.0740064	0.076218	0.0790233	0.0824987	0.0883367	0.0975134	0.10695	0.118664	0.132528	0.14594	0.159727	0.175259	0.192937	0.207222	0.219528	0.232302	0.240737	0.245338	0.253388
0.0551353	0.0533317	0.0515223	0.052277	0.0537952	0.0558744	0.0575964	0.0609669	0.0633577	0.0656453	0.0680213	0.0691645	0.0707419	0.0721634	0.0731595	0.0738826	0.0748393	0.075459	0.0758126	0.0767867	0.0777292	0.0791485	0.080356	0.0816943	0.0831564	0.0845255	0.0858709	0.0870824	0.0882954	0.0901341	0.0917393	0.0938838	0.0966994	0.0998703	0.103621	0.110114	0.120088	0.129799	0.142033	0.156158	0.169713	0.182455	0.197671	0.214233	0.227329	0.238394	0.250354	0.256599	0.259887	0.267596
0.0389491	0.0324657	0.0290285	0.0273621	0.026742	0.0267352	0.0265369	0.0276472	0.0274026	0.0283412	0.0290049	0.0293847	0.0297401	0.0302426	0.0305907	0.0310064	0.0310863	0.0314597	0.0316375	0.031919	0.0322387	0.0327894	0.0333336	0.0337979	0.0344953	0.0350205	0.0357345	0.0362631	0.0367694	0.0376158	0.0384771	0.0393283	0.0406566	0.0422798	0.044148	0.0473612	0.052215	0.05724	0.063587	0.0708997	0.0776468	0.0843334	0.0924122	0.101046	0.107292	0.113252	0.119715	0.123547	0.126281	0.130622
0.049027	0.0423832	0.0393628	0.0384756	0.0378618	0.0383655	0.0390534	0.0394889	0.0414401	0.0425219	0.0433324	0.0441806	0.045078	0.0458851	0.0460911	0.0469972	0.0475259	0.0477042	0.0482078	0.0487458	0.0493998	0.0502699	0.0512656	0.0522898	0.0531957	0.0540716	0.0550978	0.0559175	0.0567286	0.0580275	0.0594459	0.0610282	0.0634889	0.0661792	0.0692187	0.0745657	0.0821186	0.0899291	0.0997665	0.110335	0.120446	0.13012	0.141626	0.154108	0.163439	0.171508	0.180624	0.186107	0.189152	0.194428
0.0554521	0.0499814	0.0488522	0.0485236	0.0470093	0.0489317	0.0496637	0.0512885	0.0528065	0.0540958	0.0552572	0.0567985	0.0577279	0.0586958	0.0593501	0.0601687	0.0606848	0.0612998	0.0623343	0.0630267	0.0637369	0.0650778	0.0660367	0.0675198	0.0685411	0.0696892	0.070545	0.0714782	0.0725975	0.074146	0.0753832	0.0771537	0.0799118	0.0822639	0.0853262	0.0909781	0.0990992	0.107831	0.118861	0.131273	0.142922	0.154787	0.168386	0.184113	0.196459	0.206566	0.218362	0.226452	0.230356	0.236947
0.0602984	0.0548041	0.0539148	0.0537686	0.0555352	0.056388	0.0580063	0.0603158	0.0622476	0.0636579	0.0661333	0.0676702	0.0687458	0.0697682	0.0710074	0.0721051	0.0726275	0.0738405	0.0746158	0.0753969	0.076511	0.0777865	0.0789976	0.0804878	0.0816281	0.0826913	0.0838151	0.0847577	0.085977	0.087669	0.0893657	0.0915014	0.0941595	0.097268	0.101188	0.107627	0.118009	0.128957	0.141978	0.157161	0.172256	0.186619	0.202983	0.222183	0.237439	0.250218	0.264584	0.274009	0.278688	0.286886
0.0585509	0.0545592	0.053512	0.054149	0.0566516	0.0588837	0.061781	0.0629361	0.0656818	0.0676513	0.0700435	0.0719998	0.072926	0.074628	0.0753932	0.0762579	0.0773519	0.0785054	0.0792545	0.0800707	0.0813937	0.0824595	0.0842023	0.0851101	0.0867893	0.0878329	0.0889881	0.0904274	0.0915176	0.093298	0.0950698	0.097032	0.0995256	0.102344	0.105763	0.111932	0.121755	0.131896	0.144505	0.159607	0.174273	0.188894	0.206243	0.225949	0.241924	0.255736	0.27041	0.280357	0.285129	0.294323
0.0530676	0.0495669	0.0467948	0.0462133	0.0476865	0.0488684	0.0501714	0.0521932	0.0536503	0.0559148	0.0575667	0.0583262	0.0593378	0.0603874	0.0616233	0.062193	0.0629545	0.0641533	0.0646449	0.0656181	0.0665934	0.0678222	0.0690526	0.0705471	0.0718818	0.0730505	0.0744096	0.07557	0.0767686	0.0785507	0.0803711	0.0827185	0.0856104	0.088719	0.0927094	0.0991955	0.108972	0.118594	0.130837	0.145377	0.159329	0.173426	0.190012	0.208516	0.224005	0.2371	0.250781	0.259094	0.263606	0.272265
0.0442087	0.0358002	0.0340288	0.0333684	0.0321096	0.0331081	0.0336168	0.0341652	0.0356709	0.0362778	0.0371281	0.0375538	0.0384915	0.0394068	0.0402307	0.0406928	0.0410103	0.0415944	0.0420122	0.0425832	0.0430162	0.0438117	0.0444405	0.045142	0.0460498	0.0467076	0.0477213	0.0483405	0.0489363	0.0502906	0.051017	0.0521082	0.0536457	0.0554757	0.0575835	0.061184	0.0667637	0.0725338	0.0798268	0.0877306	0.0946497	0.101725	0.110214	0.118997	0.125396	0.131563	0.138409	0.142244	0.144899	0.149503
0.0509545	0.044069	0.0415405	0.0400878	0.0389808	0.0399566	0.0412193	0.0423095	0.0435233	0.0448559	0.0459385	0.0469287	0.0478822	0.0486931	0.0491273	0.0503684	0.0513201	0.0518414	0.0524765	0.0534139	0.054067	0.0548491	0.0558737	0.0569389	0.057928	0.0588345	0.0597372	0.0607281	0.0615599	0.0625841	0.0636297	0.0648007	0.066672	0.0683685	0.0704994	0.0744659	0.0804839	0.0870252	0.095331	0.104678	0.11342	0.122701	0.13368	0.14595	0.15555	0.164309	0.173761	0.180423	0.18406	0.190037
0.0544098	0.0491667	0.0489135	0.0492888	0.048558	0.0512218	0.0529203	0.0548789	0.0567583	0.058299	0.0599415	0.0613673	0.0628886	0.0640554	0.0651681	0.0663031	0.0674564	0.0684187	0.0693274	0.0704128	0.0715018	0.0727672	0.0740651	0.0754652	0.076631	0.0777561	0.0788165	0.0798227	0.0809585	0.0822067	0.0835108	0.0852598	0.087993	0.0903384	0.0935044	0.0994292	0.108291	0.117706	0.129932	0.14359	0.157156	0.170302	0.185637	0.202836	0.21644	0.227497	0.240157	0.249165	0.253215	0.260276
0.0607785	0.054431	0.053447	0.0534495	0.0549069	0.0559634	0.0581257	0.0596208	0.0615949	0.0628949	0.0645987	0.0655822	0.0674	0.0684207	0.0694946	0.0706054	0.0712327	0.0720815	0.0734035	0.0745724	0.0757042	0.0769564	0.0784803	0.0797855	0.081122	0.0823622	0.0834574	0.0845359	0.0855948	0.087471	0.0893316	0.0916933	0.0949744	0.0984402	0.102857	0.110088	0.121008	0.132818	0.146625	0.163072	0.179111	0.194598	0.212098	0.232389	0.248831	0.262419	0.277649	0.287763	0.293305	0.302372
0.0637626	0.0584902	0.0580684	0.0588253	0.0602232	0.0616822	0.0639516	0.0651717	0.0665721	0.0678988	0.0696811	0.0712837	0.0723409	0.0730114	0.0740027	0.0747637	0.0752813	0.0761382	0.077049	0.0780141	0.079423	0.0805584	0.0818059	0.0829104	0.0843641	0.0853308	0.0863833	0.0874423	0.08878	0.0900543	0.0919225	0.09407	0.0968508	0.0999331	0.104117	0.110843	0.121416	0.13254	0.146765	0.16316	0.179459	0.195811	0.214481	0.235667	0.252776	0.267504	0.283191	0.293767	0.298995	0.308758
0.0616399	0.0578968	0.0562258	0.0571758	0.0587721	0.0599187	0.0614535	0.0631383	0.0648308	0.0667224	0.0681763	0.0688574	0.0700609	0.0716381	0.0721022	0.0730333	0.0740183	0.0749865	0.0759181	0.0770462	0.0778158	0.0793778	0.0808734	0.0820113	0.0834982	0.0847067	0.0860029	0.0871982	0.0881797	0.0901413	0.0919581	0.0944867	0.0974586	0.100824	0.105087	0.112202	0.123073	0.134227	0.148187	0.165222	0.181342	0.19748	0.215991	0.236076	0.253015	0.267021	0.282052	0.291099	0.29579	0.305662
0.0424647	0.0347634	0.0330902	0.0316136	0.0308906	0.0311416	0.0313555	0.0319577	0.0324033	0.032897	0.033744	0.0339301	0.0345453	0.035209	0.0355436	0.0359851	0.0363346	0.0366737	0.0371456	0.0374037	0.0377151	0.0384801	0.0390361	0.0394486	0.0402642	0.0406683	0.0415309	0.0420732	0.0426638	0.0436737	0.0441851	0.0452381	0.0464791	0.0478741	0.0495945	0.0528693	0.0577978	0.0629491	0.0696235	0.077471	0.0849582	0.0928048	0.102451	0.113065	0.121294	0.129297	0.137774	0.142948	0.146776	0.152544
0.0509356	0.0454118	0.0428835	0.0414945	0.0409113	0.0420645	0.0423253	0.0433212	0.0443599	0.0454482	0.0463172	0.0470754	0.0474331	0.0482468	0.0487335	0.0496426	0.0499457	0.0507326	0.050994	0.051426	0.0522738	0.0528703	0.0536816	0.0545232	0.0554121	0.0561198	0.0567428	0.0572542	0.0580836	0.0588794	0.0598559	0.0608251	0.0626341	0.0646132	0.0668838	0.0714664	0.0782007	0.0855222	0.0951311	0.105893	0.116302	0.127162	0.139566	0.153237	0.163847	0.173316	0.184056	0.191063	0.195206	0.201949
0.0520974	0.0473922	0.0458609	0.0454511	0.0458422	0.0475168	0.0490484	0.0511391	0.0516112	0.0528911	0.0543296	0.0554043	0.0562384	0.057437	0.0582612	0.0591945	0.0601842	0.0612745	0.0622217	0.0633529	0.0643135	0.0653509	0.0665866	0.067921	0.0689082	0.0699493	0.0713088	0.0719978	0.0728213	0.0742033	0.0752549	0.0769144	0.0792037	0.081403	0.084196	0.0893984	0.0973095	0.105575	0.116164	0.128446	0.140705	0.152375	0.165748	0.181291	0.1935	0.203118	0.214566	0.222569	0.226562	0.23336
0.0592859	0.0534441	0.0532496	0.0537994	0.0559326	0.0564065	0.0592861	0.0611543	0.0624706	0.0648829	0.0661802	0.0675768	0.0689399	0.0700903	0.0717273	0.0731618	0.0735319	0.0754385	0.0766798	0.0781061	0.0793323	0.080829	0.0823222	0.0839747	0.0851605	0.086548	0.0878175	0.0887605	0.089705	0.0913115	0.0927812	0.0949537	0.0975925	0.100361	0.103964	0.110194	0.120229	0.130638	0.143406	0.158828	0.174441	0.189676	0.207474	0.227623	0.243878	0.257799	0.273086	0.283275	0.28849	0.297687
0.0562199	0.0513575	0.0499385	0.0489383	0.051	0.052284	0.0537311	0.0546664	0.0558132	0.0570596	0.0580214	0.0594752	0.0603942	0.0611128	0.062027	0.0627977	0.0632192	0.0639429	0.0649083	0.0657711	0.0670419	0.0679858	0.0694067	0.0703784	0.0718808	0.0729088	0.0737934	0.074914	0.0758863	0.0771402	0.0788193	0.0811674	0.0840127	0.0876855	0.0922539	0.0992361	0.110033	0.121347	0.135499	0.152052	0.168564	0.185313	0.204323	0.225576	0.243028	0.257796	0.273835	0.284386	0.290266	0.300209
0.0615998	0.0589477	0.0582718	0.0588963	0.0616986	0.0633875	0.0652582	0.0670498	0.0693733	0.0717682	0.073384	0.0748665	0.0763459	0.0775822	0.0789535	0.0800352	0.0813971	0.0824508	0.0838609	0.0854117	0.0869247	0.0884291	0.0901709	0.0915459	0.0932538	0.0948327	0.0962699	0.0974832	0.0987138	0.100465	0.10231	0.104873	0.108198	0.111955	0.116684	0.124329	0.135738	0.147487	0.162043	0.179133	0.194962	0.21065	0.228744	0.248236	0.264066	0.277488	0.292089	0.300831	0.305246	0.315116
0.046776	0.0389654	0.0367856	0.0349316	0.0344173	0.0348283	0.0354217	0.0358724	0.0368195	0.0372682	0.0381605	0.0385746	0.0391012	0.0400908	0.0405965	0.0408437	0.0416728	0.0420818	0.0425965	0.0427588	0.0433299	0.0440431	0.0447469	0.0453091	0.0463218	0.0470354	0.0479193	0.0484782	0.0491089	0.0502164	0.0510316	0.0522118	0.054051	0.0560199	0.0585465	0.0626856	0.0689288	0.0755711	0.0839051	0.0929193	0.101294	0.109688	0.119484	0.130398	0.138232	0.145667	0.153713	0.158383	0.161689	0.166932
0.0493027	0.0432324	0.0401192	0.0397894	0.0385136	0.0388224	0.040133	0.0399985	0.041206	0.0423184	0.0431853	0.0435912	0.0448933	0.0458411	0.0462503	0.0473505	0.0478401	0.0483714	0.0491473	0.049862	0.0505943	0.0514051	0.0524847	0.0536195	0.0545468	0.0555569	0.0563115	0.0571512	0.0580321	0.0590956	0.0602276	0.0614602	0.0637387	0.0659808	0.0687267	0.0739015	0.0810063	0.0887415	0.098614	0.109561	0.119912	0.130527	0.142614	0.155895	0.166069	0.175017	0.185568	0.192567	0.196675	0.203014
0.0582328	0.0523739	0.0520868	0.0516593	0.0519746	0.0537811	0.055076	0.0565817	0.0576744	0.0590133	0.0600942	0.0610838	0.0621651	0.0638678	0.0647217	0.0655482	0.066473	0.0674903	0.0685503	0.0694083	0.0704859	0.0716948	0.0728449	0.0744203	0.0755958	0.0766762	0.0778295	0.0787288	0.0796202	0.0811298	0.082264	0.0841834	0.0870399	0.0896185	0.0930617	0.0994329	0.108595	0.1183	0.130577	0.144504	0.157737	0.170878	0.185617	0.202172	0.215213	0.225932	0.238394	0.247114	0.251404	0.258883
0.0590307	0.0538822	0.0539342	0.0542801	0.0556366	0.0567191	0.0588347	0.0601293	0.0624841	0.0630594	0.065046	0.0658096	0.0673311	0.0687948	0.0699425	0.0714611	0.0722666	0.0738437	0.075215	0.0762968	0.0779277	0.0793696	0.0810614	0.0827772	0.0842794	0.0860016	0.0874805	0.0886048	0.0899173	0.0917946	0.0935512	0.095864	0.0991223	0.102584	0.10654	0.11286	0.123131	0.133807	0.146625	0.161569	0.176479	0.191261	0.208091	0.227395	0.243027	0.255808	0.269952	0.279171	0.284043	0.292609
0.0538943	0.0473496	0.045642	0.0459312	0.0470295	0.0486704	0.0501569	0.0507216	0.0524184	0.0537	0.0549274	0.0560791	0.0568353	0.0581434	0.0590398	0.0599042	0.0605215	0.0616572	0.0625228	0.0635239	0.0648096	0.0659965	0.067403	0.068448	0.0698841	0.0711235	0.0721753	0.0732302	0.0741033	0.0755	0.0771726	0.0792237	0.0816959	0.0847625	0.0886699	0.0950287	0.10431	0.114247	0.126721	0.141167	0.155604	0.170404	0.187626	0.206989	0.223007	0.236936	0.251801	0.261939	0.26773	0.277718
0.0566616	0.0529057	0.0530908	0.053555	0.0554814	0.0579225	0.0595661	0.0619771	0.063735	0.0658687	0.0677305	0.0689667	0.0702203	0.0715955	0.0726584	0.0739843	0.0752383	0.0764122	0.0776679	0.0792827	0.0805363	0.0823298	0.0840336	0.085514	0.0873179	0.0888072	0.090089	0.0913868	0.092476	0.0944069	0.096271	0.0987894	0.102087	0.105562	0.109939	0.117206	0.128219	0.139176	0.152881	0.169337	0.184466	0.199076	0.216293	0.234736	0.249237	0.261964	0.275624	0.283905	0.288539	0.298013
0.0480097	0.0406644	0.0386252	0.0376976	0.0373749	0.0370677	0.0378197	0.0386683	0.0394038	0.0404863	0.0411605	0.0417674	0.0424966	0.0431702	0.0440207	0.0444446	0.045219	0.0454367	0.0458311	0.0462345	0.0466865	0.0474028	0.0482336	0.0488221	0.0498731	0.0504862	0.0512807	0.0521166	0.05271	0.0538406	0.0549567	0.0562624	0.0582345	0.0604935	0.0631022	0.0674643	0.0741715	0.0812806	0.0901422	0.0999405	0.109212	0.118784	0.130015	0.142232	0.151242	0.159794	0.168938	0.174263	0.177912	0.183956
0.0558124	0.049266	0.0486542	0.0467073	0.0459984	0.0470724	0.047771	0.0483295	0.0499245	0.0510001	0.0516079	0.0526776	0.0533384	0.0541173	0.0543869	0.055633	0.056118	0.0566046	0.0569586	0.057569	0.0580977	0.0590554	0.0599655	0.0609804	0.0618445	0.0626248	0.0633975	0.0642016	0.0647818	0.0660676	0.066989	0.0686033	0.0710138	0.073467	0.0763648	0.0820758	0.0902224	0.099055	0.110391	0.123158	0.135646	0.148885	0.164224	0.181348	0.19453	0.206469	0.219696	0.228525	0.233434	0.241064
0.0577697	0.0522747	0.0527597	0.0525277	0.0532803	0.0548135	0.056875	0.0587895	0.0602675	0.0611702	0.0625935	0.0637484	0.0649764	0.0665247	0.0672514	0.0682948	0.0692342	0.070129	0.0713084	0.0720855	0.0731615	0.0744504	0.0754928	0.0769867	0.0783048	0.0791581	0.0801844	0.0810503	0.0818625	0.0831361	0.0843011	0.0859635	0.0887951	0.0910261	0.094291	0.100373	0.109364	0.11873	0.130776	0.144287	0.157144	0.1696	0.184142	0.200827	0.214316	0.224785	0.23754	0.246253	0.25095	0.25784
0.0582413	0.0506215	0.0496166	0.0496347	0.0513772	0.0516471	0.0529015	0.0539146	0.0555161	0.0566251	0.0578584	0.0590187	0.0598652	0.060623	0.0614665	0.0628799	0.0633525	0.0645257	0.0653709	0.0661983	0.0672167	0.0682827	0.0692321	0.070543	0.0715653	0.0723907	0.0735734	0.0742525	0.0750961	0.0763677	0.0774786	0.0790158	0.0810176	0.0832781	0.0861672	0.0911005	0.0994114	0.108422	0.119164	0.132201	0.145439	0.158617	0.173736	0.190947	0.205635	0.217529	0.230825	0.23993	0.245046	0.252858
0.0553331	0.0487075	0.0474738	0.0477831	0.049285	0.0499288	0.0520509	0.0528522	0.0548775	0.0557803	0.0572997	0.0589842	0.0596883	0.0608218	0.0618543	0.062883	0.0637643	0.064418	0.0655198	0.0667336	0.0678676	0.0690128	0.0703032	0.071161	0.0726132	0.0736593	0.0746851	0.0755404	0.0764052	0.0776531	0.0790018	0.0806567	0.0826834	0.0851995	0.0885149	0.0936148	0.102242	0.111012	0.122116	0.135438	0.148662	0.161879	0.178032	0.195923	0.210778	0.223534	0.23719	0.246375	0.251544	0.260567
0.0557365	0.0533799	0.0512776	0.0520496	0.0539488	0.0555603	0.0567006	0.0582298	0.0590196	0.0616907	0.0632238	0.0642762	0.065412	0.0667859	0.067655	0.068722	0.0699993	0.0708483	0.0716874	0.0731761	0.0741907	0.0757749	0.077475	0.0788374	0.0806431	0.0820692	0.0833786	0.0845817	0.0858443	0.0877471	0.0898163	0.0926636	0.0962188	0.100258	0.105246	0.113165	0.124678	0.136134	0.150272	0.166809	0.181737	0.196445	0.213093	0.231216	0.245452	0.257682	0.270791	0.278724	0.282613	0.291356
0.0480101	0.0405688	0.037842	0.036476	0.035988	0.0367543	0.0370649	0.0370764	0.0385058	0.0388723	0.0395667	0.0402109	0.0405438	0.0419022	0.0416989	0.0422672	0.0426412	0.0429597	0.0433154	0.0436266	0.0438667	0.0446776	0.0453426	0.0457802	0.046785	0.0473367	0.0482728	0.0487424	0.0495801	0.0504302	0.0516295	0.0527758	0.0547402	0.0571363	0.0598785	0.0645444	0.0713366	0.0787267	0.0877535	0.0981694	0.107501	0.117218	0.128616	0.140916	0.150108	0.158604	0.167903	0.173076	0.176763	0.182553
0.0531583	0.0473032	0.0447675	0.0437389	0.0430083	0.04401	0.0445052	0.0448541	0.0463699	0.0471292	0.0483959	0.0489989	0.0500009	0.0507748	0.0512487	0.0524315	0.0527852	0.0531144	0.0536522	0.0545018	0.0551529	0.0559724	0.05719	0.0580489	0.0592114	0.059922	0.060852	0.0617366	0.0625315	0.0636661	0.0649845	0.0667274	0.0691238	0.0719619	0.0750421	0.0804003	0.0884078	0.0967264	0.107279	0.118697	0.129343	0.139894	0.152481	0.166128	0.176255	0.18523	0.195432	0.201917	0.205349	0.211526
0.0541449	0.0483054	0.0473305	0.0464572	0.0462427	0.0478566	0.0487124	0.0500123	0.0510189	0.0519753	0.0527846	0.0538314	0.0547684	0.0559255	0.0567447	0.0575977	0.0581857	0.058978	0.0597952	0.0606399	0.0615142	0.0627476	0.0637342	0.0650836	0.0659739	0.0669995	0.0681071	0.0687246	0.0696856	0.0711024	0.072226	0.0741664	0.0767902	0.079222	0.0824822	0.088093	0.0963748	0.105251	0.116172	0.128833	0.141139	0.153104	0.167226	0.183188	0.195817	0.205975	0.218106	0.22655	0.23111	0.237835
0.0619015	0.0565342	0.0563892	0.0562621	0.0583331	0.0587979	0.0606091	0.0619744	0.0634029	0.0647317	0.0659408	0.0668726	0.0680657	0.0686694	0.0699912	0.0710563	0.0710518	0.0720249	0.072859	0.0737449	0.0744395	0.0755055	0.076771	0.0778203	0.0786226	0.0794095	0.0804544	0.0809641	0.0817633	0.0830317	0.0843157	0.0861494	0.0885673	0.0914358	0.0950135	0.100824	0.11057	0.120597	0.133019	0.147469	0.161938	0.176511	0.193341	0.212773	0.228883	0.241978	0.256353	0.26595	0.270991	0.27931
0.0553975	0.0502524	0.0483854	0.0487592	0.0503379	0.0509829	0.0528013	0.0538629	0.0554247	0.0572145	0.0585288	0.0600254	0.0605724	0.0615494	0.0625148	0.063131	0.063996	0.0648539	0.0654434	0.0664213	0.0671817	0.0679813	0.0691193	0.0699923	0.0713013	0.0720372	0.0731112	0.0736792	0.0745274	0.0756802	0.0768497	0.0786197	0.0806217	0.0832838	0.0868275	0.0926279	0.101828	0.111497	0.123776	0.138434	0.152637	0.16708	0.183559	0.201884	0.216568	0.229418	0.242791	0.25162	0.256269	0.265214
0.0519849	0.0478844	0.0462454	0.0455495	0.0462227	0.0471648	0.048107	0.0491774	0.0504543	0.0518311	0.0529087	0.0531463	0.0541595	0.0548085	0.0556852	0.0561107	0.056657	0.0570888	0.0576711	0.0582656	0.0585868	0.0594587	0.0605251	0.0612786	0.0623407	0.0630926	0.0639275	0.0643774	0.065144	0.0661571	0.0672681	0.0688998	0.0713111	0.0738297	0.0775457	0.083301	0.0925579	0.102149	0.11449	0.129111	0.143681	0.158549	0.175421	0.193141	0.207949	0.220511	0.233571	0.241565	0.245892	0.254863
0.0471953	0.0397078	0.0368098	0.0355818	0.0343821	0.0350117	0.0358512	0.0364534	0.037696	0.0385165	0.0393642	0.0401548	0.0412039	0.0418181	0.0420627	0.0426889	0.0432816	0.0434637	0.0439733	0.0442379	0.0445354	0.0453131	0.045958	0.0466581	0.0478514	0.0485696	0.0495597	0.0502959	0.0510007	0.0525269	0.0536444	0.0554083	0.0574101	0.059941	0.0628474	0.0675127	0.0743769	0.0816819	0.0905261	0.100358	0.109382	0.118388	0.129259	0.140842	0.14922	0.157162	0.165376	0.170173	0.173299	0.178688
0.0515698	0.0445097	0.040465	0.0385147	0.0375502	0.0385655	0.039055	0.039493	0.0408364	0.0414831	0.0427469	0.0436414	0.0444462	0.0451507	0.0457595	0.0463524	0.0468202	0.0474175	0.0479488	0.0485095	0.0492567	0.0496832	0.0508156	0.0518707	0.0529148	0.0536349	0.0547101	0.0554205	0.0563991	0.0576398	0.0588221	0.0605816	0.0632281	0.0657426	0.0686406	0.0739232	0.0813675	0.0892788	0.0991179	0.11042	0.121294	0.132329	0.145763	0.160264	0.17147	0.181422	0.192419	0.199266	0.20318	0.209308
0.0538595	0.0470598	0.0472038	0.0463853	0.0454356	0.0472542	0.0483327	0.0503988	0.0513681	0.0524822	0.0537131	0.0548355	0.0562509	0.0576427	0.0581958	0.0591018	0.0599436	0.0604545	0.0612951	0.0619712	0.0627959	0.0637109	0.064681	0.0658316	0.0669718	0.0679291	0.0690466	0.0697252	0.0708257	0.0721523	0.0732828	0.0750199	0.0774816	0.0796654	0.0823379	0.0876948	0.0952774	0.103371	0.113829	0.125541	0.136648	0.147583	0.16063	0.175473	0.187203	0.196624	0.207949	0.21555	0.219336	0.225329
0.05762	0.0511338	0.0493409	0.048419	0.0487412	0.0489116	0.0505174	0.0513732	0.052296	0.0535271	0.0549365	0.0553953	0.0563672	0.0570321	0.0576252	0.0588713	0.0587705	0.0597203	0.0603535	0.0612529	0.0619081	0.0628903	0.0635383	0.0647883	0.0656741	0.0664768	0.067444	0.068212	0.0688366	0.0702968	0.0714257	0.073316	0.0759739	0.0786899	0.0823137	0.0878839	0.0970696	0.106982	0.118573	0.13234	0.146015	0.159338	0.174709	0.191969	0.206332	0.217956	0.230863	0.239755	0.244682	0.252128
0.0579893	0.052029	0.0505511	0.0496982	0.0516124	0.0528243	0.053894	0.0556383	0.0569574	0.0581833	0.060155	0.0611349	0.0622423	0.0636095	0.0641783	0.0648741	0.0652657	0.0663362	0.0667595	0.0674749	0.068361	0.0689654	0.0699567	0.0709318	0.0718525	0.0728253	0.0736044	0.0744026	0.0752985	0.0761717	0.0772939	0.0788564	0.0804498	0.0828092	0.0856064	0.0904243	0.0985148	0.106799	0.117595	0.130156	0.142949	0.155573	0.170858	0.188018	0.202006	0.213684	0.226584	0.235085	0.239689	0.247793
0.0597754	0.0579094	0.056079	0.0544593	0.0558789	0.0570824	0.0572852	0.0585262	0.059715	0.0605551	0.0616351	0.0621751	0.0629818	0.06388	0.0644641	0.0646962	0.0651913	0.0655297	0.0657527	0.0661353	0.0664494	0.0669359	0.0678151	0.0684138	0.0693562	0.0701515	0.0708604	0.0714324	0.0718183	0.0726339	0.0734792	0.0749014	0.0765669	0.0783608	0.0809664	0.0859811	0.0938041	0.102017	0.113206	0.126754	0.140608	0.155048	0.172062	0.190745	0.206403	0.219905	0.234199	0.243085	0.24839	0.257348
0.0517777	0.0433909	0.0407278	0.0389612	0.0379416	0.0390349	0.039708	0.0406178	0.0420117	0.0425861	0.0437276	0.0442294	0.045205	0.04608	0.0462381	0.046831	0.0472064	0.0473971	0.0479153	0.0481545	0.0485771	0.0492991	0.04992	0.0504972	0.0516666	0.0524743	0.053552	0.0544287	0.0552966	0.0566362	0.0576904	0.0590887	0.0607284	0.0627581	0.0648776	0.0686502	0.0745226	0.0805058	0.0880268	0.0966699	0.10459	0.113008	0.123427	0.134834	0.14325	0.150787	0.158827	0.163271	0.166017	0.171001
0.0530441	0.0465763	0.043112	0.0421652	0.0419077	0.0424193	0.04294	0.0438859	0.0456874	0.0465426	0.0472998	0.0481455	0.0490493	0.0496398	0.0504409	0.0510805	0.0515378	0.0515517	0.0518908	0.0521151	0.0525356	0.0531139	0.0537482	0.0544299	0.0553135	0.0560687	0.0570161	0.0577987	0.0585808	0.0598362	0.0609361	0.0624734	0.0643013	0.0664629	0.068843	0.0735897	0.0803542	0.0875035	0.0966384	0.106845	0.116579	0.126448	0.138199	0.151216	0.160781	0.169355	0.179056	0.18465	0.187584	0.193314
0.0631412	0.0567896	0.0550475	0.0543205	0.0528391	0.0543699	0.0557648	0.0572069	0.0579837	0.0588503	0.0598679	0.0606664	0.0613364	0.0624534	0.0629024	0.063445	0.06376	0.0639399	0.0642064	0.0645263	0.0650619	0.0658427	0.0667138	0.0680716	0.0687794	0.0697706	0.0707106	0.0713837	0.0724201	0.0740203	0.0754078	0.0777716	0.0812611	0.0845012	0.0886122	0.0957652	0.105518	0.115735	0.128595	0.142756	0.155859	0.168859	0.183911	0.200624	0.213865	0.224477	0.236743	0.244805	0.248409	0.2547
0.0763768	0.0709545	0.0702414	0.0696628	0.0704597	0.0717343	0.0739449	0.0750436	0.0771425	0.0786211	0.0804349	0.08156	0.0827237	0.083752	0.0849291	0.0860664	0.0863947	0.0873962	0.0877757	0.0886465	0.0896366	0.0906721	0.0918514	0.0930308	0.0941798	0.0951432	0.0964715	0.0972124	0.0983521	0.100287	0.101705	0.103825	0.106615	0.10943	0.113153	0.119218	0.129052	0.139155	0.150987	0.164929	0.178088	0.190372	0.205174	0.222035	0.235678	0.246618	0.259121	0.267343	0.270893	0.277785
0.0569031	0.0514119	0.0491833	0.0488645	0.0508531	0.0519695	0.0535669	0.0552765	0.0573414	0.0590941	0.0613225	0.0628971	0.0641574	0.0657065	0.0664432	0.0676519	0.0687004	0.0694369	0.070362	0.0709606	0.0720969	0.0733409	0.0745845	0.075601	0.0769089	0.0784585	0.079458	0.0806235	0.0819349	0.0829265	0.0845844	0.0863251	0.0884626	0.0910706	0.0941643	0.0995726	0.108226	0.116939	0.127753	0.13989	0.151136	0.161782	0.174244	0.188403	0.199152	0.208093	0.21829	0.224511	0.227051	0.233176
0.0479653	0.042999	0.0389911	0.0373711	0.0386258	0.0389025	0.0383492	0.0398417	0.0408397	0.0414033	0.0422668	0.0430596	0.0437541	0.044309	0.0448629	0.0453825	0.0455775	0.045768	0.0455659	0.0461778	0.0463085	0.0466142	0.0474228	0.0478869	0.0486962	0.0491439	0.049729	0.0502451	0.0506862	0.051428	0.0520644	0.0529935	0.0541668	0.0556782	0.0579413	0.0616965	0.0679669	0.0745361	0.0830435	0.0935259	0.103951	0.1147	0.126964	0.140165	0.151254	0.160676	0.170653	0.176517	0.179794	0.185842
0.0474402	0.0395396	0.0364435	0.034101	0.0333156	0.0347027	0.0352055	0.0359095	0.0372068	0.0381296	0.0391732	0.0401525	0.0406384	0.0414786	0.0422645	0.0427598	0.0430406	0.0431515	0.0434654	0.043803	0.0441826	0.0447834	0.0452433	0.0460053	0.0469236	0.0476351	0.0484567	0.0492117	0.0499515	0.0510524	0.0517186	0.0527359	0.0539644	0.0551826	0.0565236	0.0593209	0.0633973	0.0675806	0.0729646	0.0786783	0.0838733	0.0892086	0.0956471	0.102862	0.108135	0.112923	0.118418	0.121276	0.123292	0.126922
0.0579368	0.0514981	0.0478401	0.0456924	0.0453422	0.0464185	0.0470339	0.0480416	0.0497285	0.0508753	0.0515899	0.0523412	0.0529074	0.0537274	0.0541756	0.0547699	0.0549786	0.0550366	0.0554042	0.0555624	0.0559373	0.0562513	0.0571584	0.058045	0.0589992	0.0598981	0.0610567	0.0619806	0.0627761	0.0640533	0.0655515	0.0674027	0.0699683	0.0726626	0.0756605	0.0810667	0.0886125	0.0962186	0.105923	0.116322	0.126082	0.135799	0.146968	0.158672	0.167223	0.174916	0.183638	0.188309	0.190174	0.194705
0.0563796	0.0480364	0.0467026	0.0442238	0.0438581	0.0447594	0.0460624	0.0469933	0.0477612	0.049381	0.050527	0.051144	0.0519571	0.0528596	0.0531124	0.0537503	0.0540036	0.0541863	0.0546445	0.0549096	0.0551628	0.0557641	0.0562693	0.0573171	0.058042	0.0589052	0.0597869	0.0606287	0.0615655	0.0628783	0.0638622	0.0655399	0.0679933	0.0699746	0.0726813	0.0774651	0.0843333	0.0912599	0.100481	0.110608	0.12049	0.130405	0.142225	0.155587	0.165932	0.174633	0.184614	0.19115	0.194492	0.199835
0.0584807	0.0498091	0.0470753	0.0448155	0.0445619	0.0447465	0.0454446	0.0465654	0.0482566	0.0485826	0.0499376	0.0509734	0.0517815	0.0525066	0.052882	0.0537938	0.0537297	0.0545358	0.054657	0.0550561	0.0556141	0.0563698	0.0569037	0.0579161	0.0588022	0.0596858	0.0605565	0.0612394	0.0621687	0.0635749	0.0650987	0.0667389	0.0693874	0.0719364	0.0752127	0.0803562	0.0882786	0.0964541	0.106098	0.117398	0.128401	0.138994	0.151163	0.16539	0.176683	0.186015	0.196698	0.203565	0.207048	0.213393
0.0531597	0.0452215	0.0420858	0.0403107	0.0402505	0.0402666	0.0411959	0.0415759	0.0431232	0.0440164	0.0452465	0.0464492	0.0469507	0.0477651	0.0480974	0.0484412	0.0489701	0.0492398	0.0496389	0.0500377	0.0505657	0.0513645	0.0521292	0.0530072	0.0540079	0.0547508	0.0558998	0.0566543	0.0575116	0.0585066	0.0599074	0.0615185	0.0634645	0.0659263	0.0689165	0.073591	0.0808763	0.0884308	0.0976532	0.108149	0.118448	0.128586	0.140384	0.153801	0.164636	0.173738	0.183487	0.189946	0.193318	0.199542
0.0535563	0.0501021	0.0472481	0.0463178	0.047467	0.0486073	0.0495104	0.0517106	0.053118	0.0546309	0.0563855	0.0573112	0.0584173	0.059452	0.0601639	0.0605651	0.0611039	0.0612647	0.0610796	0.0614671	0.0619305	0.0628276	0.0637252	0.0644634	0.0654458	0.06669	0.0676026	0.0684276	0.0692547	0.0703624	0.0714131	0.0727635	0.0746159	0.0766825	0.0794212	0.0843409	0.0921241	0.0997505	0.109347	0.12097	0.131633	0.1422	0.154454	0.167543	0.178113	0.186661	0.196068	0.200878	0.203023	0.208873
[truncated: 126 more columns]
